# Supplementary material for: Navigations of chemical space to further the understanding of polypharmacology in human nuclear receptors
Source: Royal Society of Chemistry journal article supplement (doi:10.1039/c2md20157g), 2012-09-15
Supplement: c2md20157g.pdf [file c2md20157g.pdf]

| PDB code_Chain | Nuclear Receptor | Phylogenetic Class | Signaling Group | Resolution (Ang.) | SiteScore | size | Dscore | volume   | exposure | enclosure |
|----------------|------------------|--------------------|-----------------|-------------------|-----------|------|--------|----------|----------|-----------|
| 1NAV_A         | TR_alpha         | NR1A1              | M/E             | 2.50              | 1.185     | 165  | 1.209  | 241.472  | 0.324    | 0.930     |
| 1BSX_A         | TR_beta          | NR1A2              | M/E             | 3.70              | 1.214     | 196  | 1.239  | 232.211  | 0.213    | 0.965     |
| 1N46_A         | TR_beta          | NR1A2              | M/E             | 2.20              | 1.197     | 150  | 1.204  | 165.669  | 0.206    | 0.979     |
| 1NAX_A         | TR_beta          | NR1A2              | M/E             | 2.70              | 1.208     | 153  | 1.225  | 197.568  | 0.261    | 0.974     |
| 1NQ0_A         | TR_beta          | NR1A2              | M/E             | 2.40              | 1.214     | 183  | 1.247  | 223.636  | 0.250    | 0.951     |
| 1NQ1_A         | TR_beta          | NR1A2              | M/E             | 2.90              | 1.205     | 162  | 1.229  | 195.510  | 0.253    | 0.956     |
| 1NQ2_A         | TR_beta          | NR1A2              | M/E             | 2.40              | 1.219     | 168  | 1.245  | 219.520  | 0.253    | 0.970     |
| 1NUO_A         | TR_beta          | NR1A2              | M/E             | 3.10              | 1.160     | 173  | 1.171  | 279.202  | 0.373    | 0.922     |
| 1Q4X_A         | TR_beta          | NR1A2              | M/E             | 2.80              | 1.214     | 225  | 1.258  | 343.000  | 0.288    | 0.930     |
| 1R6G_A         | TR_beta          | NR1A2              | M/E             | 3.00              | 1.238     | 196  | 1.279  | 246.960  | 0.180    | 0.967     |
| 1XZX_X         | TR_beta          | NR1A2              | M/E             | 2.50              | 1.248     | 170  | 1.292  | 185.906  | 0.217    | 0.975     |
| 1Y0X_X         | TR_beta          | NR1A2              | M/E             | 3.10              | 1.245     | 169  | 1.288  | 201.684  | 0.207    | 0.973     |
| 2J4A_A         | TR_beta          | NR1A2              | M/E             | 2.20              | 1.257     | 155  | 1.308  | 175.959  | 0.217    | 0.973     |
| 2PIN_A         | TR_beta          | NR1A2              | M/E             | 2.30              | 1.236     | 169  | 1.275  | 219.863  | 0.249    | 0.969     |
| 3D57_A         | TR_beta          | NR1A2              | M/E             | 2.20              | 1.249     | 166  | 1.296  | 208.887  | 0.228    | 0.971     |
| 3GWS_X         | TR_beta          | NR1A2              | M/E             | 2.20              | 1.230     | 170  | 1.263  | 203.399  | 0.238    | 0.973     |
| 3HZF_A         | TR_beta          | NR1A2              | M/E             | 2.50              | 1.200     | 143  | 1.211  | 189.336  | 0.278    | 0.974     |
| 3IMY_A         | TR_beta          | NR1A2              | M/E             | 2.55              | 1.255     | 163  | 1.306  | 211.631  | 0.256    | 0.972     |
| 1DKF_B         | RAR_alpha        | NR1B1              | M/E             | 2.50              | 1.178     | 242  | 1.230  | 468.195  | 0.355    | 0.868     |
| 1XAP_A         | RAR_beta         | NR1B2              | M/E             | 2.10              | 1.309     | 184  | 1.401  | 237.699  | 0.233    | 0.963     |
| 1EXA_A         | RAR_gamma        | NR1B3              | M/E             | 1.59              | 1.288     | 173  | 1.384  | 232.211  | 0.311    | 0.931     |
| 1EXX_A         | RAR_gamma        | NR1B3              | M/E             | 1.67              | 1.322     | 163  | 1.422  | 205.114  | 0.285    | 0.968     |
| 1FCX_A         | RAR_gamma        | NR1B3              | M/E             | 1.47              | 1.278     | 198  | 1.376  | 253.820  | 0.298    | 0.915     |
| 1FCY_A         | RAR_gamma        | NR1B3              | M/E             | 1.30              | 1.265     | 188  | 1.353  | 255.535  | 0.314    | 0.916     |
| 1FCZ_A         | RAR_gamma        | NR1B3              | M/E             | 1.38              | 1.312     | 164  | 1.409  | 199.969  | 0.251    | 0.959     |
| 1FD0_A         | RAR_gamma        | NR1B3              | M/E             | 1.38              | 1.279     | 185  | 1.376  | 253.134  | 0.305    | 0.918     |
| 2LBD_A         | RAR_gamma        | NR1B3              | M/E             | 2.06              | 1.250     | 171  | 1.336  | 245.245  | 0.342    | 0.898     |
| 3LBD_A         | RAR_gamma        | NR1B3              | M/E             | 2.40              | 1.315     | 150  | 1.410  | 196.196  | 0.235    | 0.966     |
| 4LBD_A         | RAR_gamma        | NR1B3              | M/E             | 2.50              | 1.282     | 173  | 1.370  | 254.849  | 0.319    | 0.935     |
| 1I7G_A         | PPAR_alpha       | NR1C1              | Metabolic       | 2.20              | 1.153     | 274  | 1.189  | 474.026  | 0.430    | 0.867     |
| 1K7L_A         | PPAR_alpha       | NR1C1              | Metabolic       | 2.50              | 1.155     | 410  | 1.200  | 689.087  | 0.362    | 0.853     |
| 1KKQ_A         | PPAR_alpha       | NR1C1              | Metabolic       | 3.00              | 1.150     | 515  | 1.203  | 1534.582 | 0.441    | 0.831     |
| 2NPA_A         | PPAR_alpha       | NR1C1              | Metabolic       | 2.30              | 1.155     | 405  | 1.177  | 675.710  | 0.364    | 0.893     |
| 2P54_A         | PPAR_alpha       | NR1C1              | Metabolic       | 1.79              | 1.186     | 304  | 1.235  | 526.162  | 0.414    | 0.885     |
| 2REW_A         | PPAR_alpha       | NR1C1              | Metabolic       | 2.35              | 1.134     | 438  | 1.182  | 680.512  | 0.415    | 0.820     |
| 2ZNN_A         | PPAR_alpha       | NR1C1              | Metabolic       | 2.01              | 1.188     | 367  | 1.244  | 621.859  | 0.357    | 0.874     |
| 3ET1_A         | PPAR_alpha       | NR1C1              | Metabolic       | 2.50              | 1.181     | 358  | 1.220  | 723.044  | 0.358    | 0.898     |
| 3G8I_A         | PPAR_alpha       | NR1C1              | Metabolic       | 2.20              | 1.164     | 369  | 1.187  | 541.597  | 0.285    | 0.903     |
| 1GWX_A         | PPAR_beta/delta  | NR1C2              | Metabolic       | 2.50              | 1.148     | 358  | 1.189  | 628.719  | 0.346    | 0.850     |
| 1Y0S_A         | PPAR_beta/delta  | NR1C2              | Metabolic       | 2.65              | 1.151     | 341  | 1.181  | 563.892  | 0.317    | 0.875     |

| PDB code_Chain | Nuclear Receptor | Phylogenetic Class | Signaling Group | Resolution (Ang.) | SiteScore | size | Dscore | volume  | exposure | enclosure |
|----------------|------------------|--------------------|-----------------|-------------------|-----------|------|--------|---------|----------|-----------|
| 2AWH_A         | PPAR_beta/delta  | NR1C2              | Metabolic       | 2.00              | 1.251     | 221  | 1.328  | 375.242 | 0.354    | 0.919     |
| 2B50_A         | PPAR_beta/delta  | NR1C2              | Metabolic       | 2.00              | 1.193     | 244  | 1.240  | 440.069 | 0.416    | 0.898     |
| 2BAW_A         | PPAR_beta/delta  | NR1C2              | Metabolic       | 2.30              | 1.237     | 253  | 1.303  | 441.441 | 0.374    | 0.917     |
| 2J14_A         | PPAR_beta/delta  | NR1C2              | Metabolic       | 2.80              | 1.212     | 223  | 1.282  | 379.015 | 0.389    | 0.879     |
| 2ZNP_A         | PPAR_beta/delta  | NR1C2              | Metabolic       | 3.00              | 1.169     | 292  | 1.214  | 556.689 | 0.417    | 0.871     |
| 2ZNQ_A         | PPAR_beta/delta  | NR1C2              | Metabolic       | 2.65              | 1.198     | 251  | 1.252  | 512.785 | 0.386    | 0.890     |
| 3D5F_A         | PPAR_beta/delta  | NR1C2              | Metabolic       | 2.20              | 1.245     | 236  | 1.314  | 419.489 | 0.387    | 0.924     |
| 3DY6_A         | PPAR_beta/delta  | NR1C2              | Metabolic       | 2.90              | 1.159     | 273  | 1.188  | 484.316 | 0.424    | 0.888     |
| 3ET2_A         | PPAR_beta/delta  | NR1C2              | Metabolic       | 2.24              | 1.160     | 277  | 1.178  | 512.785 | 0.407    | 0.909     |
| 3GZ9_A         | PPAR_beta/delta  | NR1C2              | Metabolic       | 2.00              | 1.205     | 258  | 1.252  | 509.012 | 0.443    | 0.911     |
| 1FM6_D         | PPAR_gamma       | NR1C3              | Metabolic       | 2.10              | 1.141     | 267  | 1.149  | 593.390 | 0.431    | 0.901     |
| 1FM9_D         | PPAR_gamma       | NR1C3              | Metabolic       | 2.10              | 1.165     | 404  | 1.197  | 755.972 | 0.370    | 0.889     |
| 1I7L_A         | PPAR_gamma       | NR1C3              | Metabolic       | 2.35              | 1.172     | 257  | 1.215  | 539.539 | 0.411    | 0.877     |
| 1KNU_A         | PPAR_gamma       | NR1C3              | Metabolic       | 2.50              | 1.136     | 417  | 1.159  | 620.830 | 0.326    | 0.868     |
| 1NYX_A         | PPAR_gamma       | NR1C3              | Metabolic       | 2.65              | 1.127     | 328  | 1.145  | 513.128 | 0.329    | 0.866     |
| 1RDT_D         | PPAR_gamma       | NR1C3              | Metabolic       | 2.40              | 1.151     | 308  | 1.193  | 490.833 | 0.388    | 0.851     |
| 1WM0_X         | PPAR_gamma       | NR1C3              | Metabolic       | 2.90              | 1.181     | 315  | 1.199  | 476.770 | 0.346    | 0.935     |
| 1ZEO_A         | PPAR_gamma       | NR1C3              | Metabolic       | 2.50              | 1.172     | 332  | 1.192  | 539.882 | 0.337    | 0.921     |
| 1ZGY_A         | PPAR_gamma       | NR1C3              | Metabolic       | 1.80              | 1.150     | 295  | 1.178  | 757.344 | 0.491    | 0.875     |
| 2ATH_A         | PPAR_gamma       | NR1C3              | Metabolic       | 2.28              | 1.159     | 330  | 1.182  | 720.643 | 0.429    | 0.898     |
| 2F4B_A         | PPAR_gamma       | NR1C3              | Metabolic       | 2.07              | 1.146     | 399  | 1.175  | 932.274 | 0.412    | 0.870     |
| 2FVJ_A         | PPAR_gamma       | NR1C3              | Metabolic       | 1.99              | 1.131     | 342  | 1.166  | 682.570 | 0.393    | 0.838     |
| 2G0G_A         | PPAR_gamma       | NR1C3              | Metabolic       | 2.54              | 1.165     | 290  | 1.184  | 617.400 | 0.429    | 0.916     |
| 2G0H_A         | PPAR_gamma       | NR1C3              | Metabolic       | 2.30              | 1.134     | 331  | 1.137  | 787.185 | 0.482    | 0.898     |
| 2GTK_A         | PPAR_gamma       | NR1C3              | Metabolic       | 2.10              | 1.173     | 199  | 1.231  | 377.300 | 0.370    | 0.851     |
| 2HWQ_A         | PPAR_gamma       | NR1C3              | Metabolic       | 1.97              | 1.141     | 300  | 1.184  | 700.406 | 0.444    | 0.839     |
| 2HWR_A         | PPAR_gamma       | NR1C3              | Metabolic       | 2.34              | 1.144     | 305  | 1.188  | 694.918 | 0.440    | 0.842     |
| 2I4J_A         | PPAR_gamma       | NR1C3              | Metabolic       | 2.10              | 1.137     | 404  | 1.154  | 680.512 | 0.355    | 0.880     |
| 2I4P_A         | PPAR_gamma       | NR1C3              | Metabolic       | 2.10              | 1.133     | 422  | 1.150  | 762.146 | 0.365    | 0.874     |
| 2I4Z_A         | PPAR_gamma       | NR1C3              | Metabolic       | 2.25              | 1.149     | 394  | 1.173  | 676.053 | 0.342    | 0.884     |
| 2OM9_A         | PPAR_gamma       | NR1C3              | Metabolic       | 2.80              | 1.120     | 401  | 1.115  | 815.997 | 0.386    | 0.877     |
| 2P4Y_A         | PPAR_gamma       | NR1C3              | Metabolic       | 2.25              | 1.118     | 278  | 1.137  | 492.548 | 0.335    | 0.851     |
| 2POB_A         | PPAR_gamma       | NR1C3              | Metabolic       | 2.30              | 1.162     | 344  | 1.193  | 623.231 | 0.373    | 0.887     |
| 2PRG_A         | PPAR_gamma       | NR1C3              | Metabolic       | 2.3               | 1.144     | 347  | 1.185  | 841.379 | 0.476    | 0.845     |
| 2Q59_A         | PPAR_gamma       | NR1C3              | Metabolic       | 2.20              | 1.182     | 304  | 1.235  | 506.611 | 0.304    | 0.872     |
| 2Q6R_A         | PPAR_gamma       | NR1C3              | Metabolic       | 2.4               | 1.115     | 322  | 1.143  | 619.800 | 0.389    | 0.830     |
| 2Q6S_B         | PPAR_gamma       | NR1C3              | Metabolic       | 2.4               | 1.144     | 279  | 1.121  | 479.510 | 0.391    | 0.913     |
| 2VST_A         | PPAR_gamma       | NR1C3              | Metabolic       | 2.35              | 1.132     | 325  | 1.158  | 742.938 | 0.403    | 0.856     |
| 2VV0_A         | PPAR_gamma       | NR1C3              | Metabolic       | 2.55              | 1.168     | 292  | 1.206  | 572.124 | 0.405    | 0.883     |
| 2VV1_A         | PPAR_gamma       | NR1C3              | Metabolic       | 2.20              | 1.138     | 283  | 1.161  | 591.675 | 0.456    | 0.872     |

| PDB code_Chain | Nuclear Receptor | Phylogenetic Class | Signaling Group | Resolution (Ang.) | SiteScore | size | Dscore | volume  | exposure | enclosure |
|----------------|------------------|--------------------|-----------------|-------------------|-----------|------|--------|---------|----------|-----------|
| 2VV2_A         | PPAR_gamma       | NR1C3              | Metabolic       | 2.75              | 1.155     | 282  | 1.190  | 574.525 | 0.434    | 0.870     |
| 2VV3_A         | PPAR_gamma       | NR1C3              | Metabolic       | 2.85              | 1.094     | 278  | 1.090  | 597.506 | 0.401    | 0.838     |
| 2VV4_A         | PPAR_gamma       | NR1C3              | Metabolic       | 2.35              | 1.126     | 287  | 1.141  | 561.148 | 0.425    | 0.870     |
| 2ZK1_A         | PPAR_gamma       | NR1C3              | Metabolic       | 2.61              | 1.167     | 373  | 1.189  | 584.815 | 0.327    | 0.909     |
| 2ZK2_A         | PPAR_gamma       | NR1C3              | Metabolic       | 2.26              | 1.163     | 384  | 1.187  | 717.213 | 0.334    | 0.900     |
| 2ZK3_A         | PPAR_gamma       | NR1C3              | Metabolic       | 2.58              | 1.176     | 300  | 1.190  | 486.374 | 0.326    | 0.937     |
| 2ZK4_A         | PPAR_gamma       | NR1C3              | Metabolic       | 2.57              | 1.133     | 431  | 1.132  | 710.696 | 0.377    | 0.897     |
| 2ZK5_A         | PPAR_gamma       | NR1C3              | Metabolic       | 2.45              | 1.200     | 200  | 1.224  | 330.995 | 0.361    | 0.951     |
| 2ZNO_A         | PPAR_gamma       | NR1C3              | Metabolic       | 2.40              | 1.136     | 352  | 1.185  | 662.676 | 0.453    | 0.821     |
| 2ZVT_A         | PPAR_gamma       | NR1C3              | Metabolic       | 1.90              | 1.147     | 305  | 1.157  | 527.191 | 0.397    | 0.905     |
| 3B3K_A         | PPAR_gamma       | NR1C3              | Metabolic       | 2.60              | 1.191     | 328  | 1.233  | 591.675 | 0.459    | 0.904     |
| 3BC5_A         | PPAR_gamma       | NR1C3              | Metabolic       | 2.27              | 1.116     | 266  | 1.129  | 425.320 | 0.340    | 0.862     |
| 3CDP_A         | PPAR_gamma       | NR1C3              | Metabolic       | 2.80              | 1.194     | 271  | 1.245  | 572.810 | 0.490    | 0.893     |
| 3CDS_A         | PPAR_gamma       | NR1C3              | Metabolic       | 2.65              | 1.169     | 323  | 1.207  | 693.203 | 0.476    | 0.882     |
| 3CS8_A         | PPAR_gamma       | NR1C3              | Metabolic       | 2.30              | 1.148     | 337  | 1.169  | 655.816 | 0.414    | 0.887     |
| 3CWD_A         | PPAR_gamma       | NR1C3              | Metabolic       | 2.40              | 1.139     | 297  | 1.151  | 557.375 | 0.390    | 0.891     |
| 3DZU_D         | PPAR_gamma       | NR1C3              | Metabolic       | 3.20              | 1.145     | 363  | 1.177  | 671.594 | 0.422    | 0.862     |
| 3DZY_D         | PPAR_gamma       | NR1C3              | Metabolic       | 3.10              | 1.143     | 284  | 1.177  | 546.399 | 0.438    | 0.856     |
| 3E00_D         | PPAR_gamma       | NR1C3              | Metabolic       | 3.10              | 1.161     | 263  | 1.186  | 751.513 | 0.461    | 0.897     |
| 3ET3_A         | PPAR_gamma       | NR1C3              | Metabolic       | 1.95              | 1.157     | 264  | 1.189  | 509.355 | 0.415    | 0.879     |
| 3FEI_A         | PPAR_gamma       | NR1C3              | Metabolic       | 2.40              | 1.154     | 314  | 1.191  | 479.171 | 0.357    | 0.866     |
| 3FEJ_A         | PPAR_gamma       | NR1C3              | Metabolic       | 2.01              | 1.094     | 270  | 1.111  | 568.694 | 0.518    | 0.825     |
| 3FUR_A         | PPAR_gamma       | NR1C3              | Metabolic       | 2.30              | 1.124     | 243  | 1.144  | 456.190 | 0.448    | 0.857     |
| 3G9E_A         | PPAR_gamma       | NR1C3              | Metabolic       | 2.30              | 1.103     | 324  | 1.131  | 575.554 | 0.459    | 0.816     |
| 3H0A_D         | PPAR_gamma       | NR1C3              | Metabolic       | 2.10              | 1.107     | 420  | 1.096  | 732.991 | 0.349    | 0.858     |
| 3H00_A         | PPAR_gamma       | NR1C3              | Metabolic       | 2.60              | 1.222     | 280  | 1.287  | 552.230 | 0.452    | 0.903     |
| 3HOD_A         | PPAR_gamma       | NR1C3              | Metabolic       | 2.10              | 1.208     | 269  | 1.257  | 541.597 | 0.458    | 0.913     |
| 3IA6_B         | PPAR_gamma       | NR1C3              | Metabolic       | 2.31              | 1.146     | 334  | 1.181  | 778.953 | 0.426    | 0.857     |
| 4PRG_A         | PPAR_gamma       | NR1C3              | Metabolic       | 2.90              | 1.079     | 457  | 1.089  | 779.639 | 0.344    | 0.816     |
| 1N83_A         | ROR_alpha        | NR1F1              | Metabolic       | 1.63              | 1.198     | 243  | 1.251  | 502.152 | 0.349    | 0.895     |
| 1S0X_A         | ROR_alpha        | NR1F1              | Metabolic       | 2.20              | 1.177     | 249  | 1.207  | 434.924 | 0.301    | 0.910     |
| 1P8D_A         | LXR_beta         | NR1H2              | Metabolic       | 2.80              | 1.232     | 261  | 1.287  | 427.721 | 0.320    | 0.932     |
| 1PQ6_A         | LXR_beta         | NR1H2              | Metabolic       | 2.40              | 1.161     | 227  | 1.196  | 416.402 | 0.370    | 0.878     |
| 1PQ9_A         | LXR_beta         | NR1H2              | Metabolic       | 2.10              | 1.298     | 115  | 1.374  | 129.997 | 0.230    | 0.982     |
| 1PQC_A         | LXR_beta         | NR1H2              | Metabolic       | 2.80              | 1.256     | 161  | 1.313  | 261.023 | 0.310    | 0.961     |
| 1UPV_A         | LXR_beta         | NR1H2              | Metabolic       | 2.10              | 1.237     | 172  | 1.300  | 346.087 | 0.430    | 0.923     |
| 1UPW_A         | LXR_beta         | NR1H2              | Metabolic       | 2.40              | 1.238     | 171  | 1.303  | 346.773 | 0.370    | 0.925     |
| 3KFC_A         | LXR_beta         | NR1H2              | Metabolic       | 2.40              | 1.220     | 248  | 1.251  | 331.681 | 0.255    | 0.962     |
| 1UHL_B         | LXR_alpha        | NR1H3              | Metabolic       | 2.90              | 1.215     | 219  | 1.273  | 566.979 | 0.350    | 0.905     |
| 2ACL_B         | LXR_alpha        | NR1H3              | Metabolic       | 2.80              | 1.253     | 235  | 1.315  | 340.942 | 0.300    | 0.948     |

| PDB code_Chain | Nuclear Receptor | Phylogenetic Class | Signaling Group | Resolution (Ang.) | SiteScore | size | Dscore | volume  | exposure | enclosure |
|----------------|------------------|--------------------|-----------------|-------------------|-----------|------|--------|---------|----------|-----------|
| 3FAL_B         | LXR_alpha        | NR1H3              | Metabolic       | 2.36              | 1.173     | 224  | 1.181  | 376.614 | 0.370    | 0.946     |
| 3FC6_B         | LXR_alpha        | NR1H3              | Metabolic       | 2.06              | 1.199     | 268  | 1.252  | 445.900 | 0.380    | 0.892     |
| 1OSH_A         | FXR              | NR1H4              | Metabolic       | 1.80              | 1.212     | 194  | 1.284  | 364.952 | 0.368    | 0.877     |
| 3BEJ_A         | FXR              | NR1H4              | Metabolic       | 1.90              | 1.150     | 219  | 1.168  | 401.653 | 0.385    | 0.896     |
| 3DCT_A         | FXR              | NR1H4              | Metabolic       | 2.50              | 1.218     | 295  | 1.276  | 536.109 | 0.363    | 0.909     |
| 3FLI_A         | FXR              | NR1H4              | Metabolic       | 2.00              | 1.256     | 222  | 1.320  | 327.220 | 0.240    | 0.946     |
| 3GD2_A         | FXR              | NR1H4              | Metabolic       | 3.20              | 1.207     | 261  | 1.258  | 441.100 | 0.319    | 0.910     |
| 3L1B_A         | FXR              | NR1H4              | Metabolic       | 1.90              | 1.171     | 181  | 1.264  | 396.850 | 0.436    | 0.782     |
| 3OKH_A         | FXR              | NR1H4              | Metabolic       | 2.50              | 1.204     | 236  | 1.276  | 468.540 | 0.306    | 0.866     |
| 3OKI_A         | FXR              | NR1H4              | Metabolic       | 2.00              | 1.165     | 242  | 1.222  | 414.340 | 0.414    | 0.841     |
| 3OLF_A         | FXR              | NR1H4              | Metabolic       | 1.90              | 1.198     | 240  | 1.238  | 406.110 | 0.330    | 0.919     |
| 3OMK_A         | FXR              | NR1H4              | Metabolic       | 1.90              | 1.168     | 249  | 1.210  | 407.140 | 0.393    | 0.873     |
| 3OMM_A         | FXR              | NR1H4              | Metabolic       | 2.10              | 1.251     | 193  | 1.315  | 352.260 | 0.263    | 0.943     |
| 3OOF_A         | FXR              | NR1H4              | Metabolic       | 2.29              | 1.197     | 230  | 1.229  | 390.330 | 0.341    | 0.932     |
| 3OOK_A         | FXR              | NR1H4              | Metabolic       | 2.29              | 1.164     | 220  | 1.207  | 382.440 | 0.415    | 0.867     |
| 1DB1_A         | VDR              | NR111              | M/E             | 1.80              | 1.241     | 202  | 1.295  | 360.150 | 0.299    | 0.946     |
| 1IE8_A         | VDR              | NR111              | M/E             | 1.52              | 1.234     | 199  | 1.282  | 332.367 | 0.279    | 0.950     |
| 1IE9_A         | VDR              | NR111              | M/E             | 1.40              | 1.236     | 200  | 1.285  | 327.908 | 0.267    | 0.950     |
| 1S0Z_A         | VDR              | NR111              | M/E             | 2.50              | 1.231     | 210  | 1.279  | 368.039 | 0.281    | 0.944     |
| 1S19_A         | VDR              | NR111              | M/E             | 2.10              | 1.222     | 203  | 1.264  | 359.121 | 0.319    | 0.945     |
| 1TXI_A         | VDR              | NR111              | M/E             | 1.90              | 1.236     | 213  | 1.288  | 359.464 | 0.263    | 0.943     |
| 2HAM_A         | VDR              | NR111              | M/E             | 1.90              | 1.237     | 211  | 1.287  | 342.314 | 0.262    | 0.947     |
| 2HAR_A         | VDR              | NR111              | M/E             | 1.90              | 1.234     | 210  | 1.283  | 342.657 | 0.281    | 0.947     |
| 2HAS_A         | VDR              | NR111              | M/E             | 1.96              | 1.223     | 234  | 1.266  | 350.203 | 0.207    | 0.946     |
| 2HB7_A         | VDR              | NR111              | M/E             | 1.80              | 1.231     | 208  | 1.278  | 347.459 | 0.304    | 0.947     |
| 2HB8_A         | VDR              | NR111              | M/E             | 2.00              | 1.233     | 211  | 1.281  | 347.802 | 0.287    | 0.948     |
| 3CS4_A         | VDR              | NR111              | M/E             | 2.00              | 1.237     | 204  | 1.288  | 349.860 | 0.284    | 0.948     |
| 3CS6_A         | VDR              | NR111              | M/E             | 1.80              | 1.237     | 203  | 1.287  | 343.343 | 0.280    | 0.948     |
| 1ILH_A         | PXR              | NR112              | Metabolic       | 2.76              | 1.232     | 184  | 1.307  | 634.207 | 0.496    | 0.896     |
| 1M13_A         | PXR              | NR112              | Metabolic       | 2.15              | 1.205     | 240  | 1.261  | 655.473 | 0.412    | 0.896     |
| 1NRL_A         | PXR              | NR112              | Metabolic       | 2.00              | 1.233     | 221  | 1.293  | 533.365 | 0.379    | 0.926     |
| 1SKX_A         | PXR              | NR112              | Metabolic       | 2.80              | 1.148     | 135  | 1.226  | 548.800 | 0.611    | 0.782     |
| 2O9I_A         | PXR              | NR112              | Metabolic       | 2.80              | 1.225     | 233  | 1.277  | 490.147 | 0.372    | 0.931     |
| 2QNV_A         | PXR              | NR112              | Metabolic       | 2.80              | 1.165     | 163  | 1.224  | 559.090 | 0.438    | 0.840     |
| 3HLV_B         | PXR              | NR112              | Metabolic       | 2.10              | 1.227     | 245  | 1.281  | 529.249 | 0.359    | 0.927     |
| 1XV9_B         | CAR              | NR113              | Metabolic       | 2.70              | 1.292     | 176  | 1.376  | 280.231 | 0.276    | 0.958     |
| 1XVP_B         | CAR              | NR113              | Metabolic       | 2.60              | 1.316     | 171  | 1.414  | 282.975 | 0.299    | 0.963     |
| 1PZL_A         | HNF4_alpha       | NR2A1              | Metabolic       | 2.10              | 1.312     | 150  | 1.404  | 185.906 | 0.194    | 0.970     |
| 3FS1_A         | HNF4_alpha       | NR2A1              | Metabolic       | 2.20              | 1.338     | 149  | 1.443  | 176.988 | 0.195    | 0.977     |
| 1LV2_A         | HNF4_gamma       | NR2A2              | Metabolic       | 2.70              | 1.272     | 185  | 1.347  | 245.588 | 0.312    | 0.949     |

| PDB code_Chain | Nuclear Receptor | Phylogenetic Class | Signaling Group | Resolution (Ang.) | SiteScore | size | Dscore | volume  | exposure | enclosure |
|----------------|------------------|--------------------|-----------------|-------------------|-----------|------|--------|---------|----------|-----------|
| 1FBY_A         | RXR_alpha        | NR2B1              | Metabolic       | 2.25              | 1.289     | 165  | 1.367  | 234.612 | 0.276    | 0.965     |
| 1FM6_A         | RXR_alpha        | NR2B1              | Metabolic       | 2.10              | 1.254     | 192  | 1.314  | 252.791 | 0.336    | 0.953     |
| 1FM9_A         | RXR_alpha        | NR2B1              | Metabolic       | 2.10              | 1.285     | 179  | 1.360  | 229.810 | 0.263    | 0.964     |
| 1G5Y_A         | RXR_alpha        | NR2B1              | Metabolic       | 2.00              | 1.123     | 198  | 1.164  | 774.494 | 0.564    | 0.818     |
| 1K74_A         | RXR_alpha        | NR2B1              | Metabolic       | 2.30              | 1.281     | 178  | 1.356  | 249.361 | 0.313    | 0.962     |
| 1MV9_A         | RXR_alpha        | NR2B1              | Metabolic       | 1.90              | 1.283     | 203  | 1.358  | 252.791 | 0.270    | 0.962     |
| 1MVC_A         | RXR_alpha        | NR2B1              | Metabolic       | 1.90              | 1.192     | 201  | 1.208  | 294.637 | 0.356    | 0.955     |
| 1MZN_A         | RXR_alpha        | NR2B1              | Metabolic       | 1.90              | 1.215     | 191  | 1.243  | 258.279 | 0.341    | 0.964     |
| 1RDT_A         | RXR_alpha        | NR2B1              | Metabolic       | 2.40              | 1.251     | 172  | 1.308  | 262.052 | 0.301    | 0.955     |
| 1XLS_A         | RXR_alpha        | NR2B1              | Metabolic       | 2.96              | 1.240     | 190  | 1.284  | 270.284 | 0.329    | 0.966     |
| 1XV9_A         | RXR_alpha        | NR2B1              | Metabolic       | 2.70              | 1.305     | 195  | 1.397  | 272.685 | 0.247    | 0.959     |
| 1XVP_A         | RXR_alpha        | NR2B1              | Metabolic       | 2.60              | 1.320     | 205  | 1.421  | 250.047 | 0.273    | 0.962     |
| 2ACL_A         | RXR_alpha        | NR2B1              | Metabolic       | 2.80              | 1.212     | 199  | 1.248  | 330.652 | 0.343    | 0.943     |
| 2P1T_A         | RXR_alpha        | NR2B1              | Metabolic       | 1.80              | 1.202     | 191  | 1.230  | 310.758 | 0.341    | 0.946     |
| 2P1U_A         | RXR_alpha        | NR2B1              | Metabolic       | 2.20              | 1.285     | 169  | 1.361  | 234.955 | 0.275    | 0.962     |
| 2P1V_A         | RXR_alpha        | NR2B1              | Metabolic       | 2.20              | 1.202     | 222  | 1.232  | 311.101 | 0.347    | 0.941     |
| 2ZXZ_A         | RXR_alpha        | NR2B1              | Metabolic       | 3.00              | 1.292     | 148  | 1.370  | 216.433 | 0.305    | 0.969     |
| 2ZY0_A         | RXR_alpha        | NR2B1              | Metabolic       | 2.90              | 1.281     | 151  | 1.352  | 221.921 | 0.263    | 0.966     |
| 3DZU_A         | RXR_alpha        | NR2B1              | Metabolic       | 3.20              | 1.309     | 197  | 1.406  | 272.342 | 0.284    | 0.956     |
| 3DZY_A         | RXR_alpha        | NR2B1              | Metabolic       | 3.10              | 1.253     | 196  | 1.327  | 347.116 | 0.310    | 0.926     |
| 3E00_A         | RXR_alpha        | NR2B1              | Metabolic       | 3.10              | 1.293     | 158  | 1.375  | 223.979 | 0.298    | 0.960     |
| 3FAL_A         | RXR_alpha        | NR2B1              | Metabolic       | 2.36              | 1.136     | 126  | 1.173  | 297.724 | 0.440    | 0.844     |
| 3FC6_A         | RXR_alpha        | NR2B1              | Metabolic       | 2.06              | 1.145     | 120  | 1.188  | 368.725 | 0.508    | 0.842     |
| 3H0A_A         | RXR_alpha        | NR2B1              | Metabolic       | 2.10              | 1.266     | 183  | 1.332  | 281.603 | 0.304    | 0.956     |
| 1H9U_A         | RXR_beta         | NR2B2              | Metabolic       | 2.70              | 1.279     | 173  | 1.370  | 240.786 | 0.276    | 0.926     |
| 1UHL_A         | RXR_beta         | NR2B2              | Metabolic       | 2.90              | 1.210     | 184  | 1.240  | 295.323 | 0.405    | 0.953     |
| 1A52_A         | ER_alpha         | NR3A1              | Endocrine       | 2.80              | 1.239     | 149  | 1.303  | 249.361 | 0.280    | 0.926     |
| 1ERE_A         | ER_alpha         | NR3A1              | Endocrine       | 3.10              | 1.306     | 134  | 1.389  | 191.051 | 0.202    | 0.977     |
| 1ERR_A         | ER_alpha         | NR3A1              | Endocrine       | 2.60              | 1.184     | 137  | 1.266  | 303.212 | 0.450    | 0.821     |
| 1G50_A         | ER_alpha         | NR3A1              | Endocrine       | 2.90              | 1.338     | 137  | 1.442  | 191.737 | 0.203    | 0.979     |
| 1GWQ_A         | ER_alpha         | NR3A1              | Endocrine       | 2.45              | 1.286     | 127  | 1.355  | 156.408 | 0.216    | 0.976     |
| 1GWR_A         | ER_alpha         | NR3A1              | Endocrine       | 2.40              | 1.287     | 121  | 1.358  | 197.225 | 0.275    | 0.974     |
| 1L2I_A         | ER_alpha         | NR3A1              | Endocrine       | 1.95              | 1.287     | 140  | 1.360  | 207.172 | 0.235    | 0.972     |
| 1PCG_A         | ER_alpha         | NR3A1              | Endocrine       | 2.70              | 1.288     | 129  | 1.360  | 198.597 | 0.237    | 0.974     |
| 1QKT_A         | ER_alpha         | NR3A1              | Endocrine       | 2.20              | 1.183     | 158  | 1.240  | 341.285 | 0.365    | 0.865     |
| 1QKU_A         | ER_alpha         | NR3A1              | Endocrine       | 3.20              | 1.318     | 135  | 1.410  | 196.882 | 0.229    | 0.975     |
| 1R5K_A         | ER_alpha         | NR3A1              | Endocrine       | 2.70              | 1.226     | 193  | 1.270  | 313.845 | 0.283    | 0.948     |
| 1SJ0_A         | ER_alpha         | NR3A1              | Endocrine       | 1.90              | 1.164     | 178  | 1.231  | 364.609 | 0.449    | 0.824     |
| 1UOM_A         | ER_alpha         | NR3A1              | Endocrine       | 2.28              | 1.231     | 136  | 1.320  | 223.979 | 0.333    | 0.869     |
| 1X7E_A         | ER_alpha         | NR3A1              | Endocrine       | 2.80              | 1.295     | 143  | 1.372  | 185.906 | 0.201    | 0.975     |

| PDB code_Chain | Nuclear Receptor | Phylogenetic Class | Signaling Group | Resolution (Ang.) | SiteScore | size | Dscore | volume  | exposure | enclosure |
|----------------|------------------|--------------------|-----------------|-------------------|-----------|------|--------|---------|----------|-----------|
| 1X7R_A         | ER_alpha         | NR3A1              | Endocrine       | 2.00              | 1.305     | 136  | 1.388  | 163.954 | 0.195    | 0.977     |
| 1XP1_A         | ER_alpha         | NR3A1              | Endocrine       | 1.80              | 1.113     | 265  | 1.151  | 503.867 | 0.425    | 0.810     |
| 1XP6_A         | ER_alpha         | NR3A1              | Endocrine       | 1.70              | 1.128     | 251  | 1.166  | 411.257 | 0.383    | 0.829     |
| 1XP9_A         | ER_alpha         | NR3A1              | Endocrine       | 1.80              | 1.125     | 252  | 1.149  | 396.165 | 0.311    | 0.852     |
| 1XPC_A         | ER_alpha         | NR3A1              | Endocrine       | 1.60              | 1.103     | 276  | 1.140  | 465.794 | 0.426    | 0.798     |
| 1XQC_A         | ER_alpha         | NR3A1              | Endocrine       | 2.05              | 1.224     | 146  | 1.302  | 281.946 | 0.336    | 0.882     |
| 1YIM_A         | ER_alpha         | NR3A1              | Endocrine       | 1.90              | 1.102     | 265  | 1.126  | 445.557 | 0.400    | 0.822     |
| 1YIN_A         | ER_alpha         | NR3A1              | Endocrine       | 2.20              | 1.199     | 146  | 1.272  | 295.323 | 0.368    | 0.857     |
| 1ZKY_A         | ER_alpha         | NR3A1              | Endocrine       | 2.25              | 1.275     | 140  | 1.336  | 185.563 | 0.200    | 0.980     |
| 2AYR_A         | ER_alpha         | NR3A1              | Endocrine       | 1.90              | 1.107     | 287  | 1.161  | 534.737 | 0.423    | 0.773     |
| 2B1V_A         | ER_alpha         | NR3A1              | Endocrine       | 1.80              | 1.285     | 134  | 1.351  | 173.558 | 0.212    | 0.982     |
| 2B1Z_A         | ER_alpha         | NR3A1              | Endocrine       | 1.78              | 1.306     | 133  | 1.390  | 183.505 | 0.194    | 0.976     |
| 2BJ4_A         | ER_alpha         | NR3A1              | Endocrine       | 2.00              | 1.212     | 139  | 1.298  | 215.404 | 0.368    | 0.850     |
| 2FAI_A         | ER_alpha         | NR3A1              | Endocrine       | 2.10              | 1.295     | 140  | 1.372  | 188.650 | 0.213    | 0.977     |
| 2G44_A         | ER_alpha         | NR3A1              | Endocrine       | 2.65              | 1.305     | 126  | 1.390  | 206.829 | 0.232    | 0.972     |
| 2I0G_A         | ER_alpha         | NR3A1              | Endocrine       | 1.60              | 1.162     | 269  | 1.221  | 433.552 | 0.393    | 0.836     |
| 2I0J_A         | ER_alpha         | NR3A1              | Endocrine       | 2.90              | 1.236     | 143  | 1.316  | 235.641 | 0.296    | 0.892     |
| 2I0K_A         | ER_alpha         | NR3A1              | Endocrine       | 2.40              | 1.236     | 152  | 1.338  | 311.101 | 0.374    | 0.850     |
| 2JF9_A         | ER_alpha         | NR3A1              | Endocrine       | 2.10              | 1.224     | 139  | 1.316  | 193.109 | 0.294    | 0.854     |
| 2JFA_A         | ER_alpha         | NR3A1              | Endocrine       | 2.55              | 1.192     | 126  | 1.260  | 206.829 | 0.330    | 0.857     |
| 2OCF_A         | ER_alpha         | NR3A1              | Endocrine       | 2.95              | 1.287     | 143  | 1.359  | 185.220 | 0.239    | 0.973     |
| 2OUZ_A         | ER_alpha         | NR3A1              | Endocrine       | 2.00              | 1.124     | 226  | 1.171  | 540.911 | 0.446    | 0.809     |
| 2P15_A         | ER_alpha         | NR3A1              | Endocrine       | 1.94              | 1.230     | 191  | 1.280  | 321.734 | 0.327    | 0.939     |
| 2POG_A         | ER_alpha         | NR3A1              | Endocrine       | 1.84              | 1.235     | 150  | 1.316  | 272.342 | 0.353    | 0.888     |
| 2Q70_A         | ER_alpha         | NR3A1              | Endocrine       | 1.95              | 1.181     | 151  | 1.240  | 268.569 | 0.398    | 0.861     |
| 2QA6_A         | ER_alpha         | NR3A1              | Endocrine       | 2.60              | 1.283     | 113  | 1.350  | 139.258 | 0.175    | 0.976     |
| 2QA8_A         | ER_alpha         | NR3A1              | Endocrine       | 1.85              | 1.302     | 140  | 1.385  | 163.954 | 0.222    | 0.974     |
| 2QAB_A         | ER_alpha         | NR3A1              | Endocrine       | 1.89              | 1.312     | 121  | 1.398  | 157.780 | 0.154    | 0.980     |
| 2QE4_A         | ER_alpha         | NR3A1              | Endocrine       | 2.40              | 1.261     | 142  | 1.353  | 225.694 | 0.272    | 0.902     |
| 2QGT_A         | ER_alpha         | NR3A1              | Endocrine       | 2.15              | 1.303     | 137  | 1.383  | 183.505 | 0.208    | 0.979     |
| 2QGW_A         | ER_alpha         | NR3A1              | Endocrine       | 2.39              | 1.298     | 130  | 1.374  | 159.495 | 0.177    | 0.978     |
| 2QH6_A         | ER_alpha         | NR3A1              | Endocrine       | 2.70              | 1.225     | 206  | 1.268  | 382.102 | 0.405    | 0.947     |
| 2QR9_A         | ER_alpha         | NR3A1              | Endocrine       | 2.00              | 1.321     | 136  | 1.420  | 215.404 | 0.236    | 0.965     |
| 2QSE_A         | ER_alpha         | NR3A1              | Endocrine       | 1.85              | 1.286     | 132  | 1.356  | 181.447 | 0.228    | 0.975     |
| 2QXM_A         | ER_alpha         | NR3A1              | Endocrine       | 2.30              | 1.289     | 132  | 1.363  | 192.080 | 0.224    | 0.971     |
| 2QXS_A         | ER_alpha         | NR3A1              | Endocrine       | 1.70              | 1.148     | 212  | 1.183  | 349.174 | 0.335    | 0.860     |
| 2R6W_A         | ER_alpha         | NR3A1              | Endocrine       | 2.00              | 1.171     | 154  | 1.254  | 276.115 | 0.412    | 0.802     |
| 2R6Y_A         | ER_alpha         | NR3A1              | Endocrine       | 2.00              | 1.173     | 143  | 1.231  | 294.980 | 0.426    | 0.852     |
| 3DT3_A         | ER_alpha         | NR3A1              | Endocrine       | 2.40              | 1.223     | 158  | 1.297  | 328.594 | 0.360    | 0.886     |
| 3ERD_A         | ER_alpha         | NR3A1              | Endocrine       | 2.03              | 1.309     | 136  | 1.395  | 175.959 | 0.218    | 0.978     |



| PDB code_Chain | Nuclear Receptor | Phylogenetic Class | Signaling Group | Resolution (Ang.) | SiteScore | size | Dscore | volume  | exposure | enclosure |
|----------------|------------------|--------------------|-----------------|-------------------|-----------|------|--------|---------|----------|-----------|
| 3ERT_A         | ER_alpha         | NR3A1              | Endocrine       | 1.90              | 1.200     | 161  | 1.282  | 415.373 | 0.449    | 0.840     |
| 1L2J_B         | ER_beta          | NR3A2              | Endocrine       | 2.95              | 1.173     | 141  | 1.232  | 337.169 | 0.376    | 0.849     |
| 1NDE_A         | ER_beta          | NR3A2              | Endocrine       | 3.00              | 1.197     | 184  | 1.267  | 343.343 | 0.361    | 0.858     |
| 1QKM_A         | ER_beta          | NR3A2              | Endocrine       | 1.80              | 1.318     | 116  | 1.408  | 134.799 | 0.165    | 0.980     |
| 1QKN_A         | ER_beta          | NR3A2              | Endocrine       | 2.25              | 1.223     | 132  | 1.303  | 219.863 | 0.327    | 0.876     |
| 1U3Q_A         | ER_beta          | NR3A2              | Endocrine       | 2.40              | 1.318     | 131  | 1.407  | 139.944 | 0.225    | 0.983     |
| 1U3R_A         | ER_beta          | NR3A2              | Endocrine       | 2.21              | 1.317     | 137  | 1.407  | 169.442 | 0.235    | 0.978     |
| 1U3S_A         | ER_beta          | NR3A2              | Endocrine       | 2.50              | 1.321     | 142  | 1.417  | 179.732 | 0.215    | 0.974     |
| 1U9E_A         | ER_beta          | NR3A2              | Endocrine       | 2.40              | 1.335     | 125  | 1.436  | 156.065 | 0.194    | 0.983     |
| 1X76_A         | ER_beta          | NR3A2              | Endocrine       | 2.20              | 1.322     | 123  | 1.413  | 161.896 | 0.217    | 0.983     |
| 1X78_A         | ER_beta          | NR3A2              | Endocrine       | 2.30              | 1.333     | 125  | 1.432  | 155.379 | 0.199    | 0.983     |
| 1X7B_A         | ER_beta          | NR3A2              | Endocrine       | 2.30              | 1.344     | 123  | 1.450  | 139.601 | 0.169    | 0.985     |
| 1X7J_A         | ER_beta          | NR3A2              | Endocrine       | 2.30              | 1.318     | 129  | 1.407  | 158.809 | 0.213    | 0.981     |
| 1YY4_A         | ER_beta          | NR3A2              | Endocrine       | 2.70              | 1.326     | 120  | 1.421  | 173.215 | 0.231    | 0.979     |
| 1YYE_A         | ER_beta          | NR3A2              | Endocrine       | 2.03              | 1.325     | 135  | 1.420  | 152.978 | 0.196    | 0.980     |
| 1ZAF_A         | ER_beta          | NR3A2              | Endocrine       | 2.20              | 1.329     | 134  | 1.427  | 162.925 | 0.202    | 0.978     |
| 2GIU_A         | ER_beta          | NR3A2              | Endocrine       | 2.20              | 1.287     | 147  | 1.360  | 199.283 | 0.250    | 0.973     |
| 2JJ3_A         | ER_beta          | NR3A2              | Endocrine       | 2.28              | 1.331     | 127  | 1.430  | 170.128 | 0.206    | 0.979     |
| 2NV7_A         | ER_beta          | NR3A2              | Endocrine       | 2.10              | 1.335     | 139  | 1.436  | 151.606 | 0.201    | 0.982     |
| 2QTU_A         | ER_beta          | NR3A2              | Endocrine       | 2.53              | 1.316     | 126  | 1.422  | 186.935 | 0.254    | 0.946     |
| 2Z4B_A         | ER_beta          | NR3A2              | Endocrine       | 2.34              | 1.309     | 134  | 1.407  | 171.500 | 0.230    | 0.952     |
| 2PJL_A         | ERR_alpha        | NR3B1              | Metabolic       | 2.30              | 1.195     | 160  | 1.240  | 216.776 | 0.234    | 0.905     |
| 2E2R_A         | ERR_gamma        | NR3B3              | Metabolic       | 1.60              | 1.275     | 108  | 1.333  | 126.910 | 0.206    | 0.984     |
| 2EWP_A         | ERR_gamma        | NR3B3              | Metabolic       | 2.30              | 1.178     | 163  | 1.244  | 271.313 | 0.366    | 0.841     |
| 2GPP_A         | ERR_gamma        | NR3B3              | Metabolic       | 2.60              | 1.195     | 144  | 1.215  | 217.805 | 0.276    | 0.950     |
| 2GPU_A         | ERR_gamma        | NR3B3              | Metabolic       | 1.70              | 1.174     | 195  | 1.242  | 341.628 | 0.405    | 0.835     |
| 2GPV_A         | ERR_gamma        | NR3B3              | Metabolic       | 2.85              | 1.217     | 135  | 1.299  | 233.240 | 0.360    | 0.864     |
| 2P7G_A         | ERR_gamma        | NR3B3              | Metabolic       | 2.10              | 1.272     | 93   | 1.339  | 124.166 | 0.250    | 0.984     |
| 2P7Z_A         | ERR_gamma        | NR3B3              | Metabolic       | 2.50              | 1.163     | 170  | 1.225  | 269.255 | 0.339    | 0.832     |
| 2ZAS_A         | ERR_gamma        | NR3B3              | Metabolic       | 2.00              | 1.218     | 88   | 1.253  | 109.760 | 0.254    | 0.988     |
| 2ZKC_A         | ERR_gamma        | NR3B3              | Metabolic       | 1.70              | 1.287     | 110  | 1.354  | 132.741 | 0.247    | 0.985     |
| 1M2Z_A         | GR               | NR3C1              | Endocrine       | 2.50              | 1.211     | 161  | 1.236  | 240.100 | 0.265    | 0.963     |
| 1NHZ_A         | GR               | NR3C1              | Endocrine       | 2.30              | 1.102     | 156  | 1.146  | 487.060 | 0.532    | 0.786     |
| 1P93_A         | GR               | NR3C1              | Endocrine       | 2.70              | 1.238     | 171  | 1.289  | 276.458 | 0.250    | 0.951     |
| 3BQD_A         | GR               | NR3C1              | Endocrine       | 2.50              | 1.208     | 244  | 1.244  | 411.943 | 0.333    | 0.936     |
| 3CLD_A         | GR               | NR3C1              | Endocrine       | 2.84              | 1.253     | 167  | 1.310  | 273.028 | 0.209    | 0.956     |
| 3E7C_A         | GR               | NR3C1              | Endocrine       | 2.15              | 1.169     | 238  | 1.191  | 414.001 | 0.298    | 0.915     |
| 3GN8_A         | GR               | NR3C1              | Endocrine       | 2.50              | 1.246     | 146  | 1.293  | 209.230 | 0.189    | 0.969     |
| 3H52_A         | GR               | NR3C1              | Endocrine       | 2.80              | 1.264     | 178  | 1.344  | 344.715 | 0.323    | 0.929     |
| 3K23_B         | GR               | NR3C1              | Endocrine       | 3.00              | 1.207     | 270  | 1.250  | 455.161 | 0.289    | 0.925     |

| PDB code_Chain | Nuclear Receptor | Phylogenetic Class | Signaling Group | Resolution (Ang.) | SiteScore | size | Dscore | volume  | exposure | enclosure |
|----------------|------------------|--------------------|-----------------|-------------------|-----------|------|--------|---------|----------|-----------|
| 1Y9R_A         | MR               | NR3C2              | Endocrine       | 1.96              | 1.287     | 143  | 1.357  | 177.674 | 0.210    | 0.977     |
| 1YA3_A         | MR               | NR3C2              | Endocrine       | 2.34              | 1.275     | 138  | 1.340  | 203.056 | 0.242    | 0.972     |
| 2A3I_A         | MR               | NR3C2              | Endocrine       | 1.95              | 1.238     | 140  | 1.275  | 191.394 | 0.231    | 0.974     |
| 2AA2_A         | MR               | NR3C2              | Endocrine       | 1.95              | 1.248     | 142  | 1.291  | 191.051 | 0.193    | 0.978     |
| 2AA5_A         | MR               | NR3C2              | Endocrine       | 2.20              | 1.250     | 141  | 1.295  | 186.935 | 0.242    | 0.975     |
| 2AA6_A         | MR               | NR3C2              | Endocrine       | 1.95              | 1.266     | 143  | 1.319  | 183.162 | 0.178    | 0.980     |
| 2AA7_A         | MR               | NR3C2              | Endocrine       | 2.20              | 1.255     | 128  | 1.302  | 182.476 | 0.251    | 0.979     |
| 2AAX_A         | MR               | NR3C2              | Endocrine       | 1.75              | 1.252     | 151  | 1.297  | 189.679 | 0.209    | 0.979     |
| 2AB2_A         | MR               | NR3C2              | Endocrine       | 1.85              | 1.265     | 142  | 1.320  | 194.481 | 0.237    | 0.977     |
| 2ABI_A         | MR               | NR3C2              | Endocrine       | 2.33              | 1.247     | 137  | 1.290  | 186.249 | 0.217    | 0.976     |
| 2OAX_A         | MR               | NR3C2              | Endocrine       | 2.29              | 1.282     | 146  | 1.353  | 230.496 | 0.223    | 0.968     |
| 1A28_A         | PR               | NR3C3              | Endocrine       | 1.80              | 1.296     | 147  | 1.374  | 208.201 | 0.265    | 0.974     |
| 1E3K_A         | PR               | NR3C3              | Endocrine       | 2.80              | 1.260     | 141  | 1.311  | 173.558 | 0.194    | 0.977     |
| 1SQN_A         | PR               | NR3C3              | Endocrine       | 1.45              | 1.291     | 146  | 1.366  | 202.370 | 0.211    | 0.974     |
| 1SR7_A         | PR               | NR3C3              | Endocrine       | 1.46              | 1.282     | 166  | 1.360  | 282.975 | 0.284    | 0.955     |
| 1ZUC_A         | PR               | NR3C3              | Endocrine       | 2.00              | 1.273     | 138  | 1.332  | 173.558 | 0.220    | 0.980     |
| 2W8Y_A         | PR               | NR3C3              | Endocrine       | 1.80              | 1.279     | 165  | 1.350  | 252.791 | 0.260    | 0.966     |
| 3KBA_A         | PR               | NR3C3              | Endocrine       | 2.00              | 1.278     | 140  | 1.347  | 215.404 | 0.296    | 0.968     |
| 1E3G_A         | AR               | NR3C4              | Endocrine       | 2.40              | 1.279     | 129  | 1.341  | 158.123 | 0.168    | 0.980     |
| 1GS4_A         | AR               | NR3C4              | Endocrine       | 1.95              | 1.241     | 153  | 1.281  | 206.486 | 0.215    | 0.974     |
| 1T5Z_A         | AR               | NR3C4              | Endocrine       | 2.30              | 1.294     | 134  | 1.368  | 187.278 | 0.207    | 0.977     |
| 1T63_A         | AR               | NR3C4              | Endocrine       | 2.07              | 1.292     | 131  | 1.366  | 192.766 | 0.243    | 0.976     |
| 1T65_A         | AR               | NR3C4              | Endocrine       | 1.66              | 1.290     | 136  | 1.363  | 187.278 | 0.218    | 0.976     |
| 1XJ7_A         | AR               | NR3C4              | Endocrine       | 2.70              | 1.262     | 127  | 1.320  | 207.515 | 0.274    | 0.966     |
| 1XOW_A         | AR               | NR3C4              | Endocrine       | 1.80              | 1.298     | 133  | 1.374  | 158.123 | 0.174    | 0.983     |
| 1XQ3_A         | AR               | NR3C4              | Endocrine       | 2.25              | 1.305     | 133  | 1.385  | 163.611 | 0.208    | 0.981     |
| 1Z95_A         | AR               | NR3C4              | Endocrine       | 1.80              | 1.296     | 162  | 1.377  | 215.404 | 0.210    | 0.970     |
| 2AM9_A         | AR               | NR3C4              | Endocrine       | 1.64              | 1.284     | 133  | 1.355  | 190.022 | 0.244    | 0.970     |
| 2AMA_A         | AR               | NR3C4              | Endocrine       | 1.90              | 1.264     | 133  | 1.321  | 188.650 | 0.249    | 0.972     |
| 2AMB_A         | AR               | NR3C4              | Endocrine       | 1.75              | 1.261     | 144  | 1.315  | 187.278 | 0.200    | 0.973     |
| 2A06_A         | AR               | NR3C4              | Endocrine       | 1.89              | 1.301     | 129  | 1.379  | 159.838 | 0.199    | 0.982     |
| 2AX6_A         | AR               | NR3C4              | Endocrine       | 1.50              | 1.275     | 111  | 1.335  | 131.026 | 0.218    | 0.981     |
| 2AX7_A         | AR               | NR3C4              | Endocrine       | 1.90              | 1.274     | 147  | 1.338  | 188.650 | 0.272    | 0.973     |
| 2AX8_A         | AR               | NR3C4              | Endocrine       | 1.70              | 1.265     | 148  | 1.322  | 202.027 | 0.285    | 0.972     |
| 2AX9_A         | AR               | NR3C4              | Endocrine       | 1.65              | 1.275     | 119  | 1.335  | 148.176 | 0.207    | 0.979     |
| 2AXA_A         | AR               | NR3C4              | Endocrine       | 1.80              | 1.281     | 144  | 1.350  | 197.568 | 0.273    | 0.973     |
| 2HVC_A         | AR               | NR3C4              | Endocrine       | 2.10              | 1.243     | 131  | 1.284  | 164.983 | 0.234    | 0.976     |
| 2OZ7_A         | AR               | NR3C4              | Endocrine       | 1.80              | 1.259     | 157  | 1.316  | 238.042 | 0.259    | 0.964     |
| 2PIO_A         | AR               | NR3C4              | Endocrine       | 2.03              | 1.264     | 138  | 1.323  | 197.568 | 0.254    | 0.967     |
| 2PIP_A         | AR               | NR3C4              | Endocrine       | 1.80              | 1.270     | 146  | 1.334  | 195.510 | 0.215    | 0.967     |



| PDB code_Chain | Nuclear Receptor | Phylogenetic Class | Signaling Group | Resolution (Ang.) | SiteScore | size | Dscore | volume  | exposure | enclosure |
|----------------|------------------|--------------------|-----------------|-------------------|-----------|------|--------|---------|----------|-----------|
| 2PIQ_A         | AR               | NR3C4              | Endocrine       | 2.40              | 1.279     | 140  | 1.349  | 194.824 | 0.251    | 0.967     |
| 2PIR_A         | AR               | NR3C4              | Endocrine       | 2.10              | 1.281     | 142  | 1.354  | 213.689 | 0.245    | 0.965     |
| 2PIT_A         | AR               | NR3C4              | Endocrine       | 1.76              | 1.283     | 141  | 1.354  | 193.795 | 0.221    | 0.970     |
| 2PIU_A         | AR               | NR3C4              | Endocrine       | 2.12              | 1.270     | 139  | 1.327  | 174.587 | 0.201    | 0.980     |
| 2PIV_A         | AR               | NR3C4              | Endocrine       | 1.95              | 1.276     | 149  | 1.343  | 190.365 | 0.199    | 0.969     |
| 2PIW_A         | AR               | NR3C4              | Endocrine       | 2.58              | 1.273     | 135  | 1.334  | 184.877 | 0.211    | 0.976     |
| 2PIX_A         | AR               | NR3C4              | Endocrine       | 2.40              | 1.295     | 141  | 1.372  | 199.283 | 0.199    | 0.974     |
| 2PKL_A         | AR               | NR3C4              | Endocrine       | 2.49              | 1.317     | 130  | 1.406  | 162.582 | 0.161    | 0.979     |
| 2PNU_A         | AR               | NR3C4              | Endocrine       | 1.65              | 1.256     | 200  | 1.314  | 282.289 | 0.225    | 0.959     |
| 2Q7I_A         | AR               | NR3C4              | Endocrine       | 1.87              | 1.325     | 132  | 1.419  | 166.355 | 0.195    | 0.983     |
| 2Q7J_A         | AR               | NR3C4              | Endocrine       | 1.90              | 1.319     | 125  | 1.408  | 163.954 | 0.204    | 0.983     |
| 2Q7K_A         | AR               | NR3C4              | Endocrine       | 1.80              | 1.323     | 131  | 1.414  | 165.326 | 0.155    | 0.984     |
| 2Q7L_A         | AR               | NR3C4              | Endocrine       | 1.92              | 1.296     | 130  | 1.372  | 181.447 | 0.198    | 0.979     |
| 2Z4J_A         | AR               | NR3C4              | Endocrine       | 2.60              | 1.301     | 127  | 1.380  | 189.336 | 0.253    | 0.978     |
| 3B5R_A         | AR               | NR3C4              | Endocrine       | 1.80              | 1.277     | 159  | 1.344  | 207.858 | 0.264    | 0.972     |
| 3B65_A         | AR               | NR3C4              | Endocrine       | 1.80              | 1.299     | 153  | 1.378  | 194.824 | 0.257    | 0.974     |
| 3B66_A         | AR               | NR3C4              | Endocrine       | 1.65              | 1.294     | 147  | 1.373  | 207.515 | 0.279    | 0.972     |
| 3B67_A         | AR               | NR3C4              | Endocrine       | 1.90              | 1.219     | 156  | 1.248  | 234.955 | 0.307    | 0.965     |
| 3B68_A         | AR               | NR3C4              | Endocrine       | 1.90              | 1.287     | 157  | 1.361  | 201.341 | 0.249    | 0.971     |

| PDB code_Chain | contact | phobic | philic | balance | don/acc | refdist | refmin | refavg | sitemin |
|----------------|---------|--------|--------|---------|---------|---------|--------|--------|---------|
| 1NAV_A         | 1.325   | 3.047  | 0.887  | 3.436   | 0.819   | 2.911   | 0.085  | 0.572  | 0.953   |
| 1BSX_A         | 1.274   | 2.967  | 0.858  | 3.459   | 0.285   | 0.287   | 0.213  | 0.589  | 1.004   |
| 1N46_A         | 1.298   | 3.603  | 0.991  | 3.635   | 0.223   | 0.348   | 0.169  | 0.561  | 0.901   |
| 1NAX_A         | 1.333   | 3.629  | 0.917  | 3.959   | 0.275   | 1.725   | 0.165  | 0.620  | 0.693   |
| 1NQ0_A         | 1.268   | 3.507  | 0.810  | 4.331   | 0.344   | 0.732   | 0.081  | 0.608  | 1.055   |
| 1NQ1_A         | 1.248   | 2.766  | 0.872  | 3.171   | 0.385   | 0.646   | 0.137  | 0.601  | 1.052   |
| 1NQ2_A         | 1.302   | 3.436  | 0.849  | 4.046   | 0.219   | 0.740   | 0.157  | 0.638  | 0.803   |
| 1NUO_A         | 1.246   | 2.421  | 0.991  | 2.444   | 0.492   | 0.720   | 0.216  | 0.673  | 1.259   |
| 1Q4X_A         | 1.237   | 3.421  | 0.735  | 4.652   | 0.220   | 0.537   | 0.166  | 0.600  | 1.268   |
| 1R6G_A         | 1.230   | 3.346  | 0.741  | 4.515   | 0.345   | 0.702   | 0.082  | 0.621  | 1.338   |
| 1XZX_X         | 1.303   | 4.146  | 0.715  | 5.798   | 0.236   | 0.837   | 0.195  | 0.559  | 0.706   |
| 1Y0X_X         | 1.309   | 3.939  | 0.722  | 5.453   | 0.192   | 0.848   | 0.219  | 0.609  | 0.775   |
| 2J4A_A         | 1.314   | 4.675  | 0.662  | 7.067   | 0.248   | 0.549   | 0.067  | 0.617  | 0.960   |
| 2PIN_A         | 1.253   | 3.383  | 0.757  | 4.468   | 0.288   | 0.132   | 0.241  | 0.554  | 0.964   |
| 3D57_A         | 1.286   | 3.974  | 0.695  | 5.718   | 0.324   | 0.463   | 0.132  | 0.631  | 0.777   |
| 3GWS_X         | 1.265   | 3.740  | 0.801  | 4.669   | 0.308   | 0.952   | 0.179  | 0.587  | 0.798   |
| 3HZF_A         | 1.360   | 3.662  | 0.963  | 3.804   | 0.541   | 1.853   | 0.136  | 0.584  | 0.991   |
| 3IMY_A         | 1.262   | 3.945  | 0.667  | 5.911   | 0.259   | 0.688   | 0.180  | 0.622  | 1.117   |
| 1DKF_B         | 1.158   | 2.791  | 0.709  | 3.935   | 0.462   | 0.955   | 0.210  | 0.670  | 1.225   |
| 1XAP_A         | 1.264   | 4.699  | 0.358  | 13.135  | 0.254   | 0.389   | 0.098  | 0.581  | 0.549   |
| 1EXA_A         | 1.260   | 4.272  | 0.353  | 12.103  | 0.520   | 0.380   | 0.129  | 0.587  | 0.924   |
| 1EXX_A         | 1.250   | 4.506  | 0.303  | 14.864  | 0.366   | 0.344   | 0.161  | 0.641  | 1.185   |
| 1FCX_A         | 1.222   | 4.222  | 0.347  | 12.151  | 0.343   | 1.303   | 0.148  | 0.609  | 1.368   |
| 1FCY_A         | 1.226   | 4.225  | 0.421  | 10.039  | 0.246   | 1.432   | 0.062  | 0.582  | 1.416   |
| 1FCZ_A         | 1.280   | 4.856  | 0.326  | 14.896  | 0.327   | 0.227   | 0.113  | 0.570  | 1.047   |
| 1FD0_A         | 1.239   | 4.355  | 0.353  | 12.331  | 0.254   | 1.112   | 0.076  | 0.610  | 1.380   |
| 2LBD_A         | 1.181   | 4.046  | 0.436  | 9.271   | 0.195   | 0.845   | 0.111  | 0.595  | 0.587   |
| 3LBD_A         | 1.302   | 4.775  | 0.337  | 14.183  | 0.214   | 0.020   | 0.156  | 0.591  | 0.533   |
| 4LBD_A         | 1.250   | 3.858  | 0.402  | 9.587   | 0.364   | 0.717   | 0.124  | 0.571  | 1.176   |
| 1I7G_A         | 1.127   | 1.960  | 0.833  | 2.353   | 0.623   | 2.149   | 0.098  | 0.623  | 1.726   |
| 1K7L_A         | 1.109   | 2.047  | 0.772  | 2.653   | 0.714   | 3.037   | 0.123  | 0.603  | 1.473   |
| 1KKQ_A         | 1.102   | 1.816  | 0.723  | 2.511   | 0.900   | 3.221   | 0.353  | 1.202  | 3.556   |
| 2NPA_A         | 1.166   | 2.017  | 0.915  | 2.203   | 0.635   | 3.034   | 0.217  | 0.591  | 2.077   |
| 2P54_A         | 1.120   | 2.177  | 0.726  | 2.999   | 0.680   | 2.118   | 0.146  | 0.572  | 1.351   |
| 2REW_A         | 1.074   | 2.241  | 0.767  | 2.921   | 0.798   | 1.965   | 0.221  | 0.561  | 2.835   |
| 2ZNN_A         | 1.120   | 2.360  | 0.678  | 3.483   | 0.628   | 2.606   | 0.150  | 0.624  | 0.517   |
| 3ET1_A         | 1.150   | 2.191  | 0.795  | 2.756   | 0.760   | 3.727   | 0.133  | 0.575  | 1.132   |
| 3G8I_A         | 1.212   | 2.216  | 0.905  | 2.449   | 0.874   | 3.792   | 0.188  | 0.623  | 1.561   |
| 1GWX_A         | 1.118   | 2.017  | 0.799  | 2.524   | 0.768   | 2.995   | 0.241  | 0.684  | 1.534   |
| 1Y0S_A         | 1.142   | 2.176  | 0.869  | 2.504   | 0.582   | 2.996   | 0.149  | 0.692  | 1.663   |

| PDB code_Chain | contact | phobic | philic | balance | don/acc | refdist | refmin | refavg | sitemin |
|----------------|---------|--------|--------|---------|---------|---------|--------|--------|---------|
| 2AWH_A         | 1.181   | 3.589  | 0.503  | 7.138   | 0.775   | 1.467   | 0.153  | 0.672  | 1.418   |
| 2B50_A         | 1.132   | 2.811  | 0.731  | 3.845   | 0.661   | 1.601   | 0.088  | 0.631  | 1.629   |
| 2BAW_A         | 1.171   | 3.553  | 0.573  | 6.198   | 0.533   | 1.055   | 0.212  | 0.693  | 1.124   |
| 2J14_A         | 1.211   | 3.152  | 0.568  | 5.550   | 0.681   | 1.767   | 0.071  | 0.598  | 1.390   |
| 2ZNP_A         | 1.158   | 2.579  | 0.762  | 3.384   | 0.667   | 2.406   | 0.116  | 0.626  | 0.607   |
| 2ZNQ_A         | 1.166   | 2.696  | 0.683  | 3.946   | 0.743   | 1.911   | 0.147  | 0.639  | 0.382   |
| 3D5F_A         | 1.209   | 3.374  | 0.554  | 6.092   | 0.731   | 0.883   | 0.124  | 0.586  | 0.857   |
| 3DY6_A         | 1.151   | 2.411  | 0.873  | 2.763   | 1.066   | 1.423   | 0.087  | 0.602  | 1.717   |
| 3ET2_A         | 1.210   | 2.024  | 0.942  | 2.149   | 0.680   | 1.929   | 0.231  | 0.568  | 1.934   |
| 3GZ9_A         | 1.208   | 2.613  | 0.720  | 3.630   | 0.720   | 1.199   | 0.071  | 0.585  | 1.134   |
| 1FM6_D         | 1.195   | 1.836  | 1.016  | 1.806   | 0.863   | 1.695   | 0.059  | 0.648  | 1.542   |
| 1FM9_D         | 1.161   | 1.987  | 0.848  | 2.342   | 0.750   | 2.979   | 0.186  | 0.625  | 2.561   |
| 1I7L_A         | 1.146   | 2.228  | 0.771  | 2.891   | 0.600   | 1.628   | 0.076  | 0.650  | 2.043   |
| 1KNU_A         | 1.165   | 1.647  | 0.927  | 1.778   | 0.809   | 2.256   | 0.128  | 0.676  | 1.601   |
| 1NYX_A         | 1.195   | 1.657  | 0.964  | 1.719   | 0.455   | 1.735   | 0.098  | 0.585  | 0.674   |
| 1RDT_D         | 1.109   | 2.137  | 0.791  | 2.701   | 0.542   | 1.216   | 0.172  | 0.608  | 2.068   |
| 1WM0_X         | 1.248   | 2.083  | 0.925  | 2.252   | 0.837   | 2.618   | 0.234  | 0.578  | 0.790   |
| 1ZEO_A         | 1.223   | 2.030  | 0.922  | 2.201   | 0.532   | 3.178   | 0.165  | 0.682  | 1.788   |
| 1ZGY_A         | 1.161   | 1.669  | 0.880  | 1.896   | 0.970   | 2.518   | 0.137  | 0.595  | 2.292   |
| 2ATH_A         | 1.184   | 1.843  | 0.911  | 2.023   | 0.821   | 2.340   | 0.227  | 0.612  | 1.105   |
| 2F4B_A         | 1.157   | 1.678  | 0.882  | 1.902   | 0.713   | 3.136   | 0.151  | 0.700  | 0.362   |
| 2FVJ_A         | 1.106   | 1.846  | 0.848  | 2.177   | 0.976   | 2.661   | 0.073  | 0.695  | 0.384   |
| 2G0G_A         | 1.204   | 1.540  | 0.938  | 1.641   | 0.514   | 3.326   | 0.262  | 0.593  | 1.615   |
| 2G0H_A         | 1.157   | 1.473  | 1.048  | 1.406   | 0.757   | 2.934   | 0.078  | 0.601  | 2.435   |
| 2GTK_A         | 1.062   | 2.263  | 0.673  | 3.363   | 0.937   | 1.142   | 0.316  | 0.666  | 2.398   |
| 2HWQ_A         | 1.102   | 1.581  | 0.797  | 1.983   | 0.666   | 3.057   | 0.098  | 0.861  | 1.160   |
| 2HWR_A         | 1.098   | 1.628  | 0.789  | 2.063   | 0.811   | 2.603   | 0.094  | 0.784  | 0.690   |
| 2I4J_A         | 1.176   | 1.952  | 0.962  | 2.029   | 0.652   | 3.301   | 0.151  | 0.755  | 1.441   |
| 2I4P_A         | 1.170   | 1.847  | 0.966  | 1.913   | 0.638   | 2.985   | 0.160  | 0.772  | 0.856   |
| 2I4Z_A         | 1.215   | 2.108  | 0.912  | 2.310   | 0.550   | 3.154   | 0.155  | 0.753  | 1.587   |
| 2OM9_A         | 1.153   | 1.411  | 1.077  | 1.310   | 0.460   | 1.948   | 0.218  | 0.750  | 1.102   |
| 2P4Y_A         | 1.151   | 1.696  | 0.961  | 1.765   | 0.621   | 2.100   | 0.132  | 0.867  | 1.214   |
| 2POB_A         | 1.158   | 1.933  | 0.856  | 2.259   | 0.427   | 1.199   | 0.176  | 0.664  | 2.491   |
| 2PRG_A         | 1.135   | 1.807  | 0.802  | 2.253   | 0.631   | 2.053   | 0.105  | 0.635  | 2.762   |
| 2Q59_A         | 1.147   | 2.556  | 0.701  | 3.649   | 0.583   | 1.690   | 0.165  | 0.695  | 0.846   |
| 2Q6R_A         | 1.112   | 1.558  | 0.905  | 1.720   | 0.963   | 1.718   | 0.217  | 0.758  | 0.667   |
| 2Q6S_B         | 1.263   | 1.710  | 1.124  | 1.522   | 0.829   | 2.813   | 0.165  | 0.608  | 0.831   |
| 2VST_A         | 1.117   | 1.686  | 0.908  | 1.856   | 0.831   | 1.866   | 0.240  | 0.887  | 1.271   |
| 2VV0_A         | 1.157   | 2.216  | 0.809  | 2.739   | 0.621   | 2.083   | 0.115  | 0.731  | 1.255   |
| 2VV1_A         | 1.154   | 1.814  | 0.926  | 1.958   | 0.578   | 1.744   | 0.075  | 0.795  | 0.357   |

| PDB code_Chain | contact | phobic | philic | balance | don/acc | refdist | refmin | refavg | sitemin |
|----------------|---------|--------|--------|---------|---------|---------|--------|--------|---------|
| 2VV2_A         | 1.123   | 1.973  | 0.835  | 2.363   | 0.746   | 2.027   | 0.105  | 0.806  | 1.395   |
| 2VV3_A         | 1.129   | 1.130  | 1.082  | 1.045   | 0.707   | 1.918   | 0.322  | 0.845  | 1.710   |
| 2VV4_A         | 1.162   | 1.601  | 0.984  | 1.627   | 0.602   | 1.308   | 0.318  | 0.995  | 0.849   |
| 2ZK1_A         | 1.189   | 1.956  | 0.907  | 2.156   | 0.899   | 2.481   | 0.130  | 0.769  | 1.291   |
| 2ZK2_A         | 1.194   | 2.167  | 0.900  | 2.409   | 0.853   | 1.653   | 0.074  | 0.838  | 1.491   |
| 2ZK3_A         | 1.239   | 1.953  | 0.958  | 2.038   | 0.889   | 1.907   | 0.229  | 0.828  | 2.297   |
| 2ZK4_A         | 1.238   | 2.060  | 1.062  | 1.939   | 0.702   | 1.146   | 0.079  | 0.782  | 2.472   |
| 2ZK5_A         | 1.240   | 2.759  | 0.881  | 3.133   | 0.931   | 0.203   | 0.156  | 0.649  | 1.083   |
| 2ZNO_A         | 1.079   | 2.052  | 0.761  | 2.696   | 0.591   | 2.989   | 0.162  | 0.875  | 1.692   |
| 2ZVT_A         | 1.199   | 1.970  | 0.999  | 1.972   | 0.704   | 2.352   | 0.238  | 0.651  | 1.192   |
| 3B3K_A         | 1.187   | 2.501  | 0.765  | 3.271   | 0.887   | 1.046   | 0.311  | 0.717  | 1.791   |
| 3BC5_A         | 1.113   | 1.585  | 1.007  | 1.574   | 0.551   | 2.457   | 0.090  | 0.573  | 2.812   |
| 3CDP_A         | 1.180   | 2.472  | 0.708  | 3.492   | 1.759   | 1.048   | 0.134  | 0.602  | 1.203   |
| 3CDS_A         | 1.174   | 2.479  | 0.805  | 3.080   | 0.886   | 2.360   | 0.134  | 0.637  | 3.079   |
| 3CS8_A         | 1.179   | 1.943  | 0.929  | 2.093   | 0.635   | 2.082   | 0.222  | 0.690  | 1.819   |
| 3CWD_A         | 1.172   | 1.830  | 0.993  | 1.844   | 0.358   | 0.705   | 0.124  | 0.720  | 1.185   |
| 3DZU_D         | 1.131   | 1.972  | 0.859  | 2.297   | 0.861   | 3.067   | 0.054  | 0.577  | 1.058   |
| 3DZY_D         | 1.095   | 1.838  | 0.848  | 2.167   | 0.610   | 2.876   | 0.141  | 0.588  | 0.443   |
| 3E00_D         | 1.154   | 1.637  | 0.897  | 1.823   | 0.516   | 0.754   | 0.162  | 1.004  | 0.804   |
| 3ET3_A         | 1.190   | 1.788  | 0.853  | 2.097   | 0.456   | 2.537   | 0.305  | 0.637  | 2.104   |
| 3FEI_A         | 1.156   | 1.896  | 0.824  | 2.300   | 0.962   | 4.296   | 0.071  | 0.693  | 1.383   |
| 3FEJ_A         | 1.052   | 1.531  | 0.995  | 1.539   | 1.321   | 2.377   | 0.266  | 0.640  | 1.961   |
| 3FUR_A         | 1.147   | 1.729  | 0.951  | 1.819   | 0.572   | 1.910   | 0.071  | 0.624  | 0.988   |
| 3G9E_A         | 1.072   | 1.546  | 0.916  | 1.687   | 1.084   | 1.675   | 0.224  | 0.656  | 1.618   |
| 3H0A_D         | 1.147   | 1.735  | 1.100  | 1.578   | 0.561   | 1.764   | 0.205  | 0.609  | 1.237   |
| 3H00_A         | 1.177   | 2.651  | 0.598  | 4.435   | 0.670   | 0.819   | 0.179  | 0.745  | 1.198   |
| 3HOD_A         | 1.170   | 2.496  | 0.707  | 3.529   | 0.741   | 1.397   | 0.079  | 0.748  | 1.756   |
| 3IA6_B         | 1.113   | 1.955  | 0.838  | 2.334   | 0.730   | 1.844   | 0.228  | 0.631  | 2.060   |
| 4PRG_A         | 1.084   | 1.347  | 1.046  | 1.289   | 0.802   | 2.789   | 0.191  | 0.745  | 1.601   |
| 1N83_A         | 1.120   | 2.367  | 0.694  | 3.408   | 0.422   | 2.613   | 0.105  | 0.736  | 0.915   |
| 1S0X_A         | 1.154   | 2.068  | 0.857  | 2.414   | 0.687   | 1.406   | 0.089  | 0.693  | 0.685   |
| 1P8D_A         | 1.208   | 2.766  | 0.650  | 4.259   | 2.284   | 0.823   | 0.319  | 0.641  | 1.409   |
| 1PQ6_A         | 1.167   | 2.569  | 0.830  | 3.095   | 1.075   | 1.576   | 0.164  | 0.715  | 1.425   |
| 1PQ9_A         | 1.256   | 3.602  | 0.476  | 7.572   | 1.905   | 0.455   | 0.143  | 0.618  | 0.797   |
| 1PQC_A         | 1.183   | 2.995  | 0.624  | 4.798   | 0.971   | 0.174   | 0.212  | 0.652  | 0.767   |
| 1UPV_A         | 1.168   | 2.624  | 0.593  | 4.424   | 2.142   | 1.092   | 0.229  | 0.753  | 1.439   |
| 1UPW_A         | 1.186   | 2.749  | 0.590  | 4.658   | 1.348   | 1.028   | 0.219  | 0.776  | 1.450   |
| 3KFC_A         | 1.249   | 2.778  | 0.816  | 3.403   | 1.155   | 2.021   | 0.290  | 0.619  | 0.661   |
| 1UHL_B         | 1.161   | 2.265  | 0.645  | 3.510   | 1.375   | 1.020   | 0.148  | 0.828  | 1.653   |
| 2ACL_B         | 1.211   | 2.917  | 0.595  | 4.904   | 1.842   | 1.842   | 0.075  | 0.650  | 1.231   |

| PDB code_Chain | contact | phobic | philic | balance | don/acc | refdist | refmin | refavg | sitemin |
|----------------|---------|--------|--------|---------|---------|---------|--------|--------|---------|
| 3FAL_B         | 1.247   | 2.256  | 1.001  | 2.254   | 1.057   | 1.777   | 0.334  | 0.762  | 0.621   |
| 3FC6_B         | 1.187   | 2.937  | 0.684  | 4.296   | 0.659   | 1.657   | 0.082  | 0.622  | 0.408   |
| 1OSH_A         | 1.159   | 2.888  | 0.560  | 5.158   | 0.985   | 0.828   | 0.131  | 0.723  | 1.548   |
| 3BEJ_A         | 1.191   | 1.764  | 0.949  | 1.859   | 0.391   | 1.415   | 0.135  | 0.644  | 0.561   |
| 3DCT_A         | 1.217   | 3.152  | 0.644  | 4.896   | 0.928   | 1.077   | 0.088  | 0.650  | 1.287   |
| 3FLI_A         | 1.215   | 3.424  | 0.574  | 5.963   | 0.864   | 1.138   | 0.063  | 0.612  | 1.031   |
| 3GD2_A         | 1.147   | 2.679  | 0.699  | 3.832   | 0.468   | 1.520   | 0.131  | 0.590  | 1.024   |
| 3L1B_A         | 1.038   | 2.983  | 0.446  | 6.682   | 0.347   | 2.854   | 0.149  | 1.336  | 1.346   |
| 3OKH_A         | 1.118   | 2.758  | 0.564  | 4.891   | 0.364   | 1.142   | 0.157  | 0.697  | 1.230   |
| 3OKI_A         | 1.138   | 2.368  | 0.682  | 3.472   | 1.131   | 1.355   | 0.170  | 0.741  | 0.316   |
| 3OLF_A         | 1.219   | 2.790  | 0.777  | 3.590   | 0.821   | 0.467   | 0.109  | 0.731  | 0.684   |
| 3OMK_A         | 1.156   | 2.499  | 0.779  | 3.208   | 0.901   | 0.902   | 0.217  | 0.716  | 0.513   |
| 3OMM_A         | 1.235   | 3.011  | 0.586  | 5.138   | 1.404   | 1.266   | 0.158  | 0.747  | 0.519   |
| 3OOF_A         | 1.223   | 2.397  | 0.828  | 2.893   | 0.814   | 0.962   | 0.176  | 0.648  | 0.452   |
| 3OOK_A         | 1.138   | 2.106  | 0.778  | 2.708   | 1.228   | 1.079   | 0.204  | 0.676  | 0.476   |
| 1DB1_A         | 1.172   | 2.495  | 0.651  | 3.831   | 0.983   | 0.653   | 0.117  | 0.658  | 0.610   |
| 1IE8_A         | 1.195   | 2.553  | 0.699  | 3.652   | 0.837   | 0.544   | 0.186  | 0.696  | 0.739   |
| 1IE9_A         | 1.198   | 2.644  | 0.690  | 3.833   | 1.093   | 0.630   | 0.195  | 0.705  | 0.686   |
| 1SOZ_A         | 1.185   | 2.572  | 0.696  | 3.695   | 1.148   | 1.220   | 0.145  | 0.694  | 1.332   |
| 1S19_A         | 1.169   | 2.598  | 0.745  | 3.487   | 0.955   | 0.907   | 0.080  | 0.689  | 1.142   |
| 1TXI_A         | 1.173   | 2.668  | 0.668  | 3.996   | 0.860   | 0.874   | 0.115  | 0.661  | 1.502   |
| 2HAM_A         | 1.197   | 2.823  | 0.678  | 4.165   | 0.908   | 0.295   | 0.147  | 0.662  | 1.123   |
| 2HAR_A         | 1.194   | 2.680  | 0.689  | 3.889   | 1.054   | 0.665   | 0.057  | 0.655  | 1.041   |
| 2HAS_A         | 1.185   | 2.593  | 0.742  | 3.494   | 0.910   | 0.441   | 0.159  | 0.637  | 1.303   |
| 2HB7_A         | 1.163   | 2.612  | 0.705  | 3.704   | 0.841   | 0.695   | 0.091  | 0.681  | 0.957   |
| 2HB8_A         | 1.154   | 2.490  | 0.698  | 3.568   | 0.788   | 0.813   | 0.154  | 0.667  | 1.161   |
| 3CS4_A         | 1.158   | 2.809  | 0.675  | 4.159   | 0.847   | 0.691   | 0.082  | 0.689  | 0.879   |
| 3CS6_A         | 1.187   | 2.656  | 0.680  | 3.907   | 1.106   | 0.704   | 0.141  | 0.734  | 0.742   |
| 1ILH_A         | 1.024   | 2.139  | 0.523  | 4.086   | 1.031   | 0.419   | 0.173  | 1.174  | 1.233   |
| 1M13_A         | 1.128   | 2.163  | 0.662  | 3.266   | 0.639   | 3.343   | 0.209  | 1.127  | 0.436   |
| 1NRL_A         | 1.190   | 2.563  | 0.622  | 4.118   | 1.041   | 1.905   | 0.230  | 0.902  | 1.407   |
| 1SKX_A         | 0.890   | 1.689  | 0.560  | 3.014   | 0.778   | 1.223   | 0.137  | 1.591  | 1.020   |
| 2O9I_A         | 1.194   | 2.272  | 0.680  | 3.342   | 1.519   | 1.997   | 0.225  | 0.835  | 1.460   |
| 2QNV_A         | 1.110   | 1.878  | 0.673  | 2.789   | 0.776   | 1.636   | 0.250  | 1.181  | 0.988   |
| 3HLV_B         | 1.200   | 2.622  | 0.660  | 3.971   | 0.977   | 2.422   | 0.045  | 0.863  | 1.822   |
| 1XV9_B         | 1.144   | 3.562  | 0.425  | 8.378   | 0.526   | 0.411   | 0.108  | 0.711  | 0.892   |
| 1XVP_B         | 1.204   | 4.087  | 0.320  | 12.755  | 1.393   | 0.760   | 0.205  | 0.599  | 1.590   |
| 1PZL_A         | 1.233   | 4.926  | 0.362  | 13.621  | 0.248   | 0.943   | 0.091  | 0.586  | 1.529   |
| 3FS1_A         | 1.239   | 4.929  | 0.256  | 19.284  | 0.524   | 0.863   | 0.037  | 0.541  | 1.425   |
| 1LV2_A         | 1.182   | 3.930  | 0.497  | 7.914   | 0.289   | 0.475   | 0.181  | 0.581  | 1.579   |

| PDB code_Chain | contact | phobic | philic | balance | don/acc | refdist | refmin | refavg | sitemin |
|----------------|---------|--------|--------|---------|---------|---------|--------|--------|---------|
| 1FBY_A         | 1.212   | 4.339  | 0.466  | 9.302   | 0.160   | 0.314   | 0.171  | 0.652  | 0.726   |
| 1FM6_A         | 1.213   | 3.639  | 0.608  | 5.987   | 0.444   | 0.109   | 0.218  | 0.562  | 0.865   |
| 1FM9_A         | 1.221   | 4.087  | 0.485  | 8.425   | 0.264   | 0.069   | 0.134  | 0.563  | 0.893   |
| 1G5Y_A         | 1.049   | 1.901  | 0.818  | 2.325   | 0.429   | 1.981   | 0.139  | 1.119  | 0.604   |
| 1K74_A         | 1.216   | 4.142  | 0.494  | 8.379   | 0.482   | 0.192   | 0.249  | 0.747  | 0.616   |
| 1MV9_A         | 1.212   | 4.338  | 0.487  | 8.913   | 0.130   | 0.268   | 0.138  | 0.641  | 1.137   |
| 1MVC_A         | 1.235   | 2.941  | 0.936  | 3.142   | 0.223   | 1.390   | 0.085  | 0.612  | 1.340   |
| 1MZN_A         | 1.244   | 3.249  | 0.846  | 3.842   | 0.306   | 0.264   | 0.198  | 0.570  | 0.725   |
| 1RDT_A         | 1.192   | 3.233  | 0.630  | 5.135   | 0.298   | 0.174   | 0.090  | 0.684  | 0.709   |
| 1XLS_A         | 1.239   | 3.095  | 0.723  | 4.283   | 0.411   | 0.877   | 0.084  | 0.635  | 0.425   |
| 1XV9_A         | 1.204   | 4.410  | 0.362  | 12.168  | 0.371   | 0.737   | 0.305  | 0.662  | 1.192   |
| 1XVP_A         | 1.184   | 4.619  | 0.295  | 15.684  | 0.355   | 1.024   | 0.171  | 0.590  | 1.502   |
| 2ACL_A         | 1.240   | 3.459  | 0.791  | 4.374   | 0.422   | 0.451   | 0.166  | 0.670  | 0.423   |
| 2P1T_A         | 1.243   | 3.080  | 0.852  | 3.615   | 0.383   | 1.236   | 0.184  | 0.640  | 0.562   |
| 2P1U_A         | 1.221   | 3.940  | 0.480  | 8.216   | 0.549   | 0.505   | 0.205  | 0.604  | 0.479   |
| 2P1V_A         | 1.235   | 3.250  | 0.835  | 3.894   | 0.548   | 0.844   | 0.138  | 0.632  | 0.433   |
| 2ZXZ_A         | 1.207   | 3.971  | 0.464  | 8.553   | 0.495   | 0.346   | 0.208  | 0.634  | 0.751   |
| 2ZY0_A         | 1.213   | 3.804  | 0.513  | 7.422   | 0.147   | 0.276   | 0.126  | 0.619  | 0.908   |
| 3DZU_A         | 1.201   | 4.710  | 0.330  | 14.287  | 0.878   | 0.864   | 0.247  | 0.675  | 1.080   |
| 3DZY_A         | 1.195   | 3.398  | 0.518  | 6.557   | 0.637   | 0.720   | 0.041  | 0.708  | 0.599   |
| 3E00_A         | 1.208   | 3.918  | 0.432  | 9.069   | 0.262   | 0.565   | 0.245  | 0.599  | 1.111   |
| 3FAL_A         | 1.138   | 2.348  | 0.838  | 2.801   | 0.372   | 2.186   | 0.110  | 1.030  | 1.170   |
| 3FC6_A         | 1.104   | 2.224  | 0.791  | 2.813   | 1.020   | 0.701   | 0.237  | 0.909  | 1.449   |
| 3H0A_A         | 1.230   | 3.256  | 0.558  | 5.838   | 0.585   | 1.024   | 0.090  | 0.681  | 1.445   |
| 1H9U_A         | 1.187   | 3.848  | 0.383  | 10.037  | 0.459   | 0.290   | 0.216  | 0.591  | 1.068   |
| 1UHL_A         | 1.216   | 3.230  | 0.835  | 3.868   | 0.387   | 0.760   | 0.191  | 0.591  | 1.070   |
| 1A52_A         | 1.222   | 3.259  | 0.589  | 5.534   | 1.001   | 0.722   | 0.106  | 0.667  | 1.198   |
| 1ERE_A         | 1.201   | 3.910  | 0.420  | 9.307   | 0.758   | 0.365   | 0.089  | 0.630  | 0.830   |
| 1ERR_A         | 1.038   | 2.434  | 0.511  | 4.767   | 2.376   | 2.425   | 0.049  | 0.886  | 1.395   |
| 1G50_A         | 1.260   | 4.683  | 0.261  | 17.936  | 0.659   | 0.523   | 0.131  | 0.691  | 0.900   |
| 1GWQ_A         | 1.253   | 3.848  | 0.523  | 7.359   | 0.770   | 0.453   | 0.176  | 0.732  | 0.769   |
| 1GWR_A         | 1.215   | 3.538  | 0.512  | 6.909   | 0.676   | 0.183   | 0.173  | 0.661  | 0.613   |
| 1L2I_A         | 1.199   | 3.836  | 0.501  | 7.658   | 0.755   | 0.368   | 0.164  | 0.729  | 0.478   |
| 1PCG_A         | 1.254   | 3.666  | 0.503  | 7.284   | 1.215   | 0.304   | 0.039  | 0.671  | 0.984   |
| 1QKT_A         | 1.115   | 2.427  | 0.672  | 3.611   | 1.580   | 1.624   | 0.311  | 0.709  | 1.166   |
| 1QKU_A         | 1.241   | 4.404  | 0.354  | 12.433  | 1.578   | 0.555   | 0.106  | 0.671  | 0.787   |
| 1R5K_A         | 1.228   | 2.628  | 0.734  | 3.580   | 0.897   | 0.578   | 0.155  | 0.645  | 0.330   |
| 1SJ0_A         | 1.044   | 2.446  | 0.623  | 3.926   | 1.451   | 1.191   | 0.280  | 0.808  | 0.505   |
| 1UOM_A         | 1.075   | 3.593  | 0.435  | 8.267   | 1.781   | 3.261   | 0.158  | 1.109  | 0.784   |
| 1X7E_A         | 1.240   | 4.446  | 0.471  | 9.448   | 0.824   | 0.591   | 0.206  | 0.726  | 0.837   |



| PDB code_Chain | contact | phobic | philic | balance | don/acc | refdist | refmin | refavg | sitemin |
|----------------|---------|--------|--------|---------|---------|---------|--------|--------|---------|
| 1X7R_A         | 1.219   | 4.496  | 0.423  | 10.628  | 1.043   | 0.571   | 0.204  | 0.694  | 0.944   |
| 1XP1_A         | 1.056   | 1.619  | 0.845  | 1.916   | 1.101   | 1.574   | 0.115  | 0.632  | 1.327   |
| 1XP6_A         | 1.084   | 1.799  | 0.834  | 2.156   | 1.254   | 1.508   | 0.277  | 0.658  | 1.388   |
| 1XP9_A         | 1.097   | 1.926  | 0.927  | 2.078   | 0.848   | 1.712   | 0.178  | 0.678  | 1.188   |
| 1XPC_A         | 1.067   | 1.588  | 0.855  | 1.857   | 1.195   | 2.146   | 0.214  | 0.663  | 1.040   |
| 1XQC_A         | 1.135   | 3.204  | 0.512  | 6.254   | 2.238   | 2.114   | 0.132  | 0.836  | 0.710   |
| 1YIM_A         | 1.093   | 1.545  | 0.943  | 1.639   | 0.977   | 2.202   | 0.107  | 0.641  | 1.332   |
| 1YIN_A         | 1.075   | 2.426  | 0.560  | 4.328   | 1.695   | 2.257   | 0.177  | 0.884  | 1.344   |
| 1ZKY_A         | 1.201   | 3.503  | 0.590  | 5.940   | 0.513   | 0.238   | 0.123  | 0.661  | 0.534   |
| 2AYR_A         | 1.030   | 2.208  | 0.745  | 2.961   | 0.555   | 1.366   | 0.121  | 0.736  | 1.065   |
| 2B1V_A         | 1.269   | 3.985  | 0.546  | 7.297   | 0.924   | 0.204   | 0.114  | 0.582  | 0.990   |
| 2B1Z_A         | 1.201   | 3.850  | 0.416  | 9.259   | 1.851   | 0.326   | 0.136  | 0.679  | 0.916   |
| 2BJ4_A         | 1.042   | 2.697  | 0.466  | 5.791   | 2.400   | 1.977   | 0.134  | 0.916  | 0.605   |
| 2FAI_A         | 1.199   | 4.056  | 0.473  | 8.573   | 0.572   | 0.419   | 0.270  | 0.686  | 0.596   |
| 2G44_A         | 1.233   | 4.367  | 0.408  | 10.702  | 1.087   | 0.099   | 0.210  | 0.704  | 0.576   |
| 2I0G_A         | 1.095   | 2.292  | 0.676  | 3.388   | 1.664   | 0.956   | 0.250  | 0.694  | 0.786   |
| 2I0J_A         | 1.133   | 3.099  | 0.490  | 6.329   | 1.267   | 1.148   | 0.281  | 0.756  | 1.018   |
| 2I0K_A         | 1.052   | 3.166  | 0.344  | 9.203   | 1.807   | 0.553   | 0.138  | 0.735  | 1.444   |
| 2JF9_A         | 1.084   | 3.325  | 0.420  | 7.921   | 2.136   | 1.677   | 0.257  | 0.938  | 0.902   |
| 2JFA_A         | 1.062   | 2.929  | 0.596  | 4.917   | 1.365   | 3.214   | 0.351  | 1.817  | 0.802   |
| 2OCF_A         | 1.200   | 3.616  | 0.507  | 7.133   | 0.634   | 0.480   | 0.107  | 0.645  | 0.811   |
| 2OUZ_A         | 1.059   | 1.730  | 0.781  | 2.215   | 1.278   | 2.027   | 0.125  | 0.836  | 1.495   |
| 2P15_A         | 1.213   | 3.349  | 0.685  | 4.887   | 0.987   | 0.585   | 0.117  | 0.634  | 1.279   |
| 2POG_A         | 1.059   | 3.385  | 0.479  | 7.060   | 1.443   | 0.594   | 0.196  | 0.652  | 0.999   |
| 2Q70_A         | 1.036   | 2.455  | 0.666  | 3.687   | 1.093   | 0.917   | 0.150  | 0.698  | 1.034   |
| 2QA6_A         | 1.220   | 3.671  | 0.538  | 6.824   | 0.739   | 0.236   | 0.313  | 0.657  | 0.914   |
| 2QA8_A         | 1.247   | 4.617  | 0.428  | 10.794  | 0.516   | 0.407   | 0.322  | 0.671  | 0.728   |
| 2QAB_A         | 1.263   | 4.351  | 0.398  | 10.936  | 0.554   | 0.647   | 0.088  | 0.592  | 0.805   |
| 2QE4_A         | 1.163   | 3.809  | 0.394  | 9.662   | 1.510   | 0.410   | 0.142  | 0.655  | 0.394   |
| 2QGT_A         | 1.238   | 4.053  | 0.442  | 9.169   | 0.655   | 0.605   | 0.110  | 0.613  | 0.625   |
| 2QGW_A         | 1.238   | 4.223  | 0.468  | 9.021   | 0.889   | 0.311   | 0.229  | 0.623  | 0.553   |
| 2QH6_A         | 1.256   | 2.941  | 0.738  | 3.987   | 1.410   | 1.429   | 0.085  | 0.648  | 0.617   |
| 2QR9_A         | 1.215   | 4.415  | 0.303  | 14.593  | 1.337   | 0.713   | 0.236  | 0.842  | 0.631   |
| 2QSE_A         | 1.224   | 3.829  | 0.518  | 7.392   | 0.694   | 0.310   | 0.310  | 0.726  | 0.595   |
| 2QXM_A         | 1.232   | 3.737  | 0.491  | 7.611   | 0.758   | 0.600   | 0.255  | 0.708  | 0.453   |
| 2QXS_A         | 1.130   | 1.972  | 0.836  | 2.359   | 1.095   | 0.649   | 0.157  | 0.611  | 0.904   |
| 2R6W_A         | 1.003   | 2.283  | 0.512  | 4.460   | 2.328   | 2.928   | 0.135  | 1.082  | 1.409   |
| 2R6Y_A         | 1.059   | 2.245  | 0.674  | 3.329   | 1.459   | 1.927   | 0.152  | 0.946  | 0.913   |
| 3DT3_A         | 1.096   | 2.771  | 0.536  | 5.167   | 1.345   | 0.280   | 0.192  | 0.673  | 1.053   |
| 3ERD_A         | 1.224   | 4.411  | 0.406  | 10.863  | 0.935   | 0.144   | 0.279  | 0.586  | 0.661   |

| PDB code_Chain | contact | phobic | philic | balance | don/acc | refdist | refmin | refavg | sitemin |
|----------------|---------|--------|--------|---------|---------|---------|--------|--------|---------|
| 3ERT_A         | 1.024   | 2.490  | 0.496  | 5.025   | 1.776   | 0.735   | 0.195  | 1.025  | 0.537   |
| 1L2J_B         | 1.084   | 2.366  | 0.667  | 3.548   | 0.996   | 1.154   | 0.189  | 0.726  | 1.154   |
| 1NDE_A         | 1.081   | 3.021  | 0.577  | 5.240   | 1.040   | 0.844   | 0.074  | 0.787  | 1.185   |
| 1QKM_A         | 1.252   | 4.684  | 0.368  | 12.724  | 0.852   | 0.309   | 0.197  | 0.587  | 0.708   |
| 1QKN_A         | 1.118   | 3.233  | 0.500  | 6.469   | 1.278   | 3.258   | 0.134  | 1.709  | 0.864   |
| 1U3Q_A         | 1.267   | 4.937  | 0.376  | 13.136  | 0.709   | 0.184   | 0.156  | 0.557  | 0.857   |
| 1U3R_A         | 1.228   | 4.844  | 0.368  | 13.148  | 0.900   | 0.830   | 0.178  | 0.615  | 1.085   |
| 1U3S_A         | 1.227   | 4.837  | 0.331  | 14.598  | 1.130   | 0.562   | 0.171  | 0.568  | 1.034   |
| 1U9E_A         | 1.230   | 5.114  | 0.289  | 17.688  | 1.000   | 0.856   | 0.090  | 0.603  | 0.766   |
| 1X76_A         | 1.231   | 4.556  | 0.360  | 12.672  | 1.182   | 0.437   | 0.180  | 0.613  | 0.574   |
| 1X78_A         | 1.238   | 5.179  | 0.299  | 17.298  | 1.873   | 0.218   | 0.127  | 0.641  | 0.589   |
| 1X7B_A         | 1.266   | 5.513  | 0.249  | 22.178  | 0.839   | 0.281   | 0.156  | 0.586  | 0.613   |
| 1X7J_A         | 1.213   | 4.432  | 0.372  | 11.921  | 1.760   | 0.417   | 0.154  | 0.683  | 0.790   |
| 1YY4_A         | 1.238   | 4.530  | 0.325  | 13.922  | 2.195   | 0.468   | 0.259  | 0.759  | 0.759   |
| 1YYE_A         | 1.231   | 4.626  | 0.330  | 14.030  | 1.397   | 0.674   | 0.236  | 0.657  | 0.937   |
| 1ZAF_A         | 1.255   | 4.696  | 0.305  | 15.396  | 1.487   | 0.570   | 0.139  | 0.642  | 0.775   |
| 2GIU_A         | 1.213   | 3.839  | 0.502  | 7.652   | 1.019   | 1.127   | 0.182  | 0.684  | 0.856   |
| 2JJ3_A         | 1.213   | 4.850  | 0.298  | 16.277  | 0.769   | 0.560   | 0.184  | 0.707  | 0.574   |
| 2NV7_A         | 1.253   | 4.860  | 0.287  | 16.942  | 0.751   | 0.192   | 0.092  | 0.594  | 0.654   |
| 2QTU_A         | 1.202   | 4.503  | 0.262  | 17.154  | 1.208   | 0.478   | 0.114  | 0.750  | 0.829   |
| 2Z4B_A         | 1.236   | 4.223  | 0.319  | 13.246  | 1.300   | 0.276   | 0.064  | 0.620  | 0.832   |
| 2PJL_A         | 1.143   | 2.597  | 0.746  | 3.480   | 5.779   | 0.548   | 0.084  | 0.705  | 1.835   |
| 2E2R_A         | 1.285   | 3.367  | 0.605  | 5.566   | 1.354   | 0.056   | 0.159  | 0.595  | 1.148   |
| 2EWP_A         | 1.050   | 2.624  | 0.614  | 4.270   | 7.645   | 0.412   | 0.174  | 0.692  | 0.262   |
| 2GPP_A         | 1.351   | 3.247  | 0.905  | 3.588   | 1.459   | 0.950   | 0.109  | 0.621  | 1.284   |
| 2GPU_A         | 1.126   | 2.737  | 0.611  | 4.478   | 4.328   | 0.746   | 0.127  | 0.616  | 1.126   |
| 2GPV_A         | 1.083   | 3.239  | 0.489  | 6.620   | 2.899   | 1.452   | 0.236  | 0.875  | 0.681   |
| 2P7G_A         | 1.270   | 4.154  | 0.484  | 8.578   | 3.425   | 0.125   | 0.135  | 0.625  | 1.209   |
| 2P7Z_A         | 1.040   | 2.304  | 0.658  | 3.504   | 2.999   | 1.139   | 0.305  | 0.808  | 0.649   |
| 2ZAS_A         | 1.272   | 3.397  | 0.680  | 4.993   | 0.918   | 0.198   | 0.172  | 0.632  | 1.025   |
| 2ZKC_A         | 1.237   | 3.654  | 0.543  | 6.734   | 1.342   | 0.384   | 0.290  | 0.693  | 0.832   |
| 1M2Z_A         | 1.209   | 1.852  | 0.864  | 2.144   | 1.273   | 0.261   | 0.201  | 0.693  | 1.251   |
| 1NHZ_A         | 1.005   | 1.335  | 0.814  | 1.641   | 1.242   | 1.622   | 0.152  | 0.936  | 1.276   |
| 1P93_A         | 1.209   | 2.569  | 0.681  | 3.775   | 1.808   | 0.444   | 0.073  | 0.712  | 1.068   |
| 3BQD_A         | 1.227   | 2.423  | 0.789  | 3.071   | 0.866   | 1.340   | 0.198  | 0.719  | 0.481   |
| 3CLD_A         | 1.204   | 2.817  | 0.625  | 4.510   | 1.453   | 0.289   | 0.134  | 0.687  | 1.185   |
| 3E7C_A         | 1.257   | 2.002  | 0.915  | 2.187   | 0.876   | 1.322   | 0.184  | 0.637  | 0.507   |
| 3GN8_A         | 1.241   | 2.476  | 0.701  | 3.531   | 1.273   | 0.213   | 0.202  | 0.672  | 1.122   |
| 3H52_A         | 1.177   | 3.238  | 0.469  | 6.902   | 2.081   | 1.058   | 0.069  | 0.699  | 0.879   |
| 3K23_B         | 1.252   | 2.550  | 0.752  | 3.391   | 0.945   | 0.650   | 0.137  | 0.636  | 1.168   |

| PDB code_Chain | contact | phobic | philic | balance | don/acc | refdist | refmin | refavg | sitemin |
|----------------|---------|--------|--------|---------|---------|---------|--------|--------|---------|
| 1Y9R_A         | 1.245   | 3.901  | 0.521  | 7.492   | 0.839   | 0.140   | 0.205  | 0.671  | 1.056   |
| 1YA3_A         | 1.228   | 3.307  | 0.561  | 5.892   | 0.922   | 0.213   | 0.310  | 0.676  | 1.177   |
| 2A3I_A         | 1.215   | 2.572  | 0.764  | 3.366   | 0.993   | 0.214   | 0.142  | 0.642  | 1.122   |
| 2AA2_A         | 1.225   | 3.014  | 0.723  | 4.169   | 0.701   | 0.141   | 0.157  | 0.640  | 0.922   |
| 2AA5_A         | 1.225   | 2.746  | 0.705  | 3.897   | 1.227   | 0.416   | 0.131  | 0.664  | 1.351   |
| 2AA6_A         | 1.218   | 3.147  | 0.642  | 4.905   | 0.833   | 0.094   | 0.211  | 0.630  | 1.020   |
| 2AA7_A         | 1.216   | 2.849  | 0.691  | 4.126   | 0.469   | 0.345   | 0.192  | 0.680  | 0.920   |
| 2AAX_A         | 1.234   | 3.151  | 0.705  | 4.470   | 0.998   | 0.135   | 0.231  | 0.615  | 1.078   |
| 2AB2_A         | 1.216   | 3.156  | 0.630  | 5.006   | 1.345   | 0.383   | 0.117  | 0.768  | 1.045   |
| 2ABI_A         | 1.224   | 2.787  | 0.721  | 3.867   | 1.130   | 0.137   | 0.242  | 0.702  | 0.994   |
| 2OAX_A         | 1.220   | 3.177  | 0.514  | 6.184   | 1.870   | 0.149   | 0.214  | 0.708  | 0.904   |
| 1A28_A         | 1.207   | 3.438  | 0.463  | 7.429   | 1.841   | 0.230   | 0.049  | 0.667  | 0.979   |
| 1E3K_A         | 1.251   | 2.847  | 0.662  | 4.302   | 3.147   | 0.822   | 0.068  | 0.584  | 0.649   |
| 1SQN_A         | 1.231   | 3.495  | 0.486  | 7.189   | 2.534   | 0.729   | 0.115  | 0.631  | 1.382   |
| 1SR7_A         | 1.179   | 3.049  | 0.470  | 6.485   | 1.525   | 0.222   | 0.094  | 0.668  | 0.611   |
| 1ZUC_A         | 1.264   | 3.142  | 0.602  | 5.221   | 1.695   | 0.337   | 0.197  | 0.578  | 0.688   |
| 2W8Y_A         | 1.203   | 3.443  | 0.520  | 6.625   | 2.146   | 0.420   | 0.236  | 0.706  | 0.995   |
| 3KBA_A         | 1.218   | 3.291  | 0.532  | 6.182   | 3.055   | 0.372   | 0.069  | 0.673  | 0.776   |
| 1E3G_A         | 1.295   | 3.701  | 0.572  | 6.467   | 1.485   | 0.268   | 0.195  | 0.630  | 0.670   |
| 1GS4_A         | 1.240   | 3.007  | 0.747  | 4.024   | 0.797   | 0.538   | 0.116  | 0.714  | 0.787   |
| 1T5Z_A         | 1.231   | 3.650  | 0.484  | 7.546   | 1.273   | 0.247   | 0.129  | 0.654  | 0.769   |
| 1T63_A         | 1.203   | 3.413  | 0.488  | 6.990   | 1.435   | 0.183   | 0.258  | 0.631  | 0.762   |
| 1T65_A         | 1.166   | 3.563  | 0.498  | 7.149   | 1.561   | 0.408   | 0.066  | 0.624  | 0.780   |
| 1XJ7_A         | 1.223   | 3.149  | 0.612  | 5.145   | 1.152   | 0.397   | 0.163  | 0.716  | 0.722   |
| 1XOW_A         | 1.257   | 4.001  | 0.478  | 8.365   | 1.746   | 0.317   | 0.098  | 0.609  | 0.856   |
| 1XQ3_A         | 1.266   | 3.922  | 0.440  | 8.916   | 1.342   | 0.229   | 0.104  | 0.653  | 0.730   |
| 1Z95_A         | 1.291   | 3.766  | 0.446  | 8.452   | 3.315   | 0.404   | 0.168  | 0.588  | 1.478   |
| 2AM9_A         | 1.205   | 3.562  | 0.512  | 6.956   | 0.632   | 0.745   | 0.085  | 0.630  | 0.728   |
| 2AMA_A         | 1.222   | 3.295  | 0.619  | 5.321   | 0.709   | 0.673   | 0.115  | 0.604  | 0.746   |
| 2AMB_A         | 1.242   | 3.595  | 0.642  | 5.601   | 1.534   | 0.536   | 0.151  | 0.619  | 0.937   |
| 2AO6_A         | 1.264   | 3.996  | 0.460  | 8.696   | 1.636   | 0.341   | 0.104  | 0.622  | 0.835   |
| 2AX6_A         | 1.319   | 3.602  | 0.595  | 6.055   | 1.745   | 0.554   | 0.249  | 0.616  | 1.204   |
| 2AX7_A         | 1.299   | 3.950  | 0.570  | 6.929   | 2.901   | 0.491   | 0.203  | 0.546  | 1.396   |
| 2AX8_A         | 1.281   | 2.720  | 0.617  | 4.411   | 1.420   | 0.388   | 0.129  | 0.569  | 1.734   |
| 2AX9_A         | 1.282   | 3.482  | 0.590  | 5.900   | 2.337   | 0.452   | 0.054  | 0.568  | 1.076   |
| 2AXA_A         | 1.337   | 3.617  | 0.534  | 6.780   | 1.318   | 0.420   | 0.128  | 0.593  | 1.664   |
| 2HVC_A         | 1.209   | 3.052  | 0.742  | 4.114   | 1.283   | 0.435   | 0.194  | 0.609  | 0.703   |
| 2OZ7_A         | 1.188   | 2.912  | 0.621  | 4.689   | 0.248   | 0.522   | 0.236  | 0.661  | 0.898   |
| 2PIO_A         | 1.201   | 3.122  | 0.606  | 5.150   | 0.873   | 0.462   | 0.183  | 0.631  | 0.664   |
| 2PIP_A         | 1.195   | 3.226  | 0.570  | 5.657   | 0.841   | 0.290   | 0.140  | 0.618  | 0.782   |

| PDB code_Chain | contact | phobic | philic | balance | don/acc | refdist | refmin | refavg | sitemin |
|----------------|---------|--------|--------|---------|---------|---------|--------|--------|---------|
| 2PIQ_A         | 1.218   | 3.575  | 0.525  | 6.812   | 1.230   | 0.197   | 0.130  | 0.642  | 0.786   |
| 2PIR_A         | 1.180   | 3.315  | 0.507  | 6.542   | 0.145   | 0.382   | 0.105  | 0.635  | 0.741   |
| 2PIT_A         | 1.221   | 3.317  | 0.517  | 6.419   | 0.863   | 0.464   | 0.079  | 0.626  | 0.599   |
| 2PIU_A         | 1.248   | 3.270  | 0.617  | 5.304   | 1.218   | 0.361   | 0.110  | 0.621  | 0.814   |
| 2PIV_A         | 1.219   | 3.221  | 0.547  | 5.893   | 0.836   | 0.422   | 0.197  | 0.627  | 0.595   |
| 2PIW_A         | 1.202   | 3.309  | 0.588  | 5.629   | 0.579   | 0.468   | 0.113  | 0.634  | 0.610   |
| 2PIX_A         | 1.206   | 3.439  | 0.467  | 7.361   | 1.556   | 0.391   | 0.204  | 0.631  | 0.692   |
| 2PKL_A         | 1.225   | 3.849  | 0.371  | 10.376  | 0.367   | 0.300   | 0.139  | 0.582  | 0.767   |
| 2PNU_A         | 1.241   | 3.247  | 0.618  | 5.251   | 0.883   | 0.502   | 0.169  | 0.583  | 1.282   |
| 2Q7I_A         | 1.227   | 4.153  | 0.340  | 12.224  | 1.416   | 0.501   | 0.064  | 0.595  | 0.752   |
| 2Q7J_A         | 1.238   | 4.413  | 0.374  | 11.805  | 1.654   | 0.696   | 0.151  | 0.649  | 0.780   |
| 2Q7K_A         | 1.271   | 4.290  | 0.356  | 12.037  | 1.576   | 0.708   | 0.107  | 0.596  | 0.815   |
| 2Q7L_A         | 1.243   | 3.563  | 0.475  | 7.501   | 2.239   | 0.260   | 0.159  | 0.657  | 0.768   |
| 2Z4J_A         | 1.212   | 3.623  | 0.451  | 8.027   | 1.298   | 0.235   | 0.214  | 0.656  | 0.815   |
| 3B5R_A         | 1.315   | 3.642  | 0.550  | 6.623   | 2.136   | 0.423   | 0.188  | 0.649  | 1.874   |
| 3B65_A         | 1.356   | 4.160  | 0.448  | 9.276   | 1.749   | 0.958   | 0.100  | 0.603  | 1.201   |
| 3B66_A         | 1.338   | 3.844  | 0.462  | 8.318   | 2.357   | 0.707   | 0.191  | 0.627  | 1.858   |
| 3B67_A         | 1.288   | 2.551  | 0.831  | 3.071   | 0.928   | 0.334   | 0.136  | 0.565  | 1.542   |
| 3B68_A         | 1.329   | 3.624  | 0.495  | 7.315   | 1.492   | 0.911   | 0.176  | 0.591  | 1.779   |

| Cognate Ligand (SMILE)                                                                         | PDB code_Chain |
|------------------------------------------------------------------------------------------------|----------------|
| <chem>O=C(O)Cc1cc(Cl)c(c(Cl)c1)Oc(c2)ccc(O)c2C(C)C</chem>                                      | 1NAV_A         |
| <chem>O=C(O)[C@@H]([NH4])Cc(cc1)cc(l)c1Oc(cc2)cc(l)c2O</chem>                                  | 1BSX_A         |
| <chem>CC(C)c1c(O)ccc(c1)Oc(c2C)c(C)ccc(c2)-n(c(=O)[nH]3)ncc3=O</chem>                          | 1N46_A         |
| <chem>O=C(O)Cc1cc(Cl)c(c(Cl)c1)Oc(c2)ccc(O)c2C(C)C</chem>                                      | 1NAX_A         |
| <chem>O=C(O)Cc(cc1)cc(l)c1Oc(cc2)cc(l)c2O</chem>                                               | 1NQ0_A         |
| <chem>O=C(O)Cc(cc1)cc(l)c1Oc(cc2)cc(l)c2O</chem>                                               | 1NQ1_A         |
| <chem>O=C(O)Cc(cc1)cc(l)c1Oc(cc2)cc(l)c2O</chem>                                               | 1NQ2_A         |
| <chem>O=C(O)Cc(cc1)cc(l)c1Oc(cc2)cc(l)c2O</chem>                                               | 1NUO_A         |
| <chem>O=C(O)COc(cc1C)cc(C)c1Cc(c2)ccc(O)c2Cc3cccc3</chem>                                      | 1Q4X_A         |
| <chem>c1cccc1CCNC(=O)c2c(O)ccc(c2)Oc(c(Br)c3)c(Br)cc3CC(O)O</chem>                             | 1R6G_A         |
| <chem>O=C(O)[C@@H]([NH4])Cc(cc1)cc(l)c1Oc(cc2)cc(l)c2O</chem>                                  | 1XZX_X         |
| <chem>O=C(O)[C@@H]([NH4])Cc(cc1)cc(l)c1Oc(cc2)cc(l)c2O</chem>                                  | 1Y0X_X         |
| <chem>O=C(O)CCc1cc(Br)c(c(Br)c1)Oc(c2)ccc(O)c2C(C)C</chem>                                     | 2J4A_A         |
| <chem>O=C(O)Cc(cc1)cc(l)c1Oc(cc2)cc(l)c2O</chem>                                               | 2PIN_A         |
| <chem>O=C(O)Cc(cc1)cc(l)c1Oc(cc2)cc(l)c2O</chem>                                               | 3D57_A         |
| <chem>O=C(O)[C@@H]([NH4])Cc(cc1)cc(l)c1Oc(cc2)cc(l)c2O</chem>                                  | 3GWS_X         |
| <chem>O=C(O)COc(cc1C)cc(C)c1Cc(c2)ccc(O)c2C(C)C</chem>                                         | 3HZF_A         |
| <chem>O=C(O)COc(cc1C)cc(C)c1Cc(c2)ccc(O)c2C(C)C</chem>                                         | 3IMY_A         |
| <chem>O=C(O)c1ccc(cc1)NC(=O)c(cc2)cc(c23)C(CCC3(C)C)c(c4)cnc(c45)cccc5</chem>                  | 1DKF_B         |
| <chem>O=C(O)c1ccc(cc1)/C=C(\C)c(c2)ccc(c23)C(C)(C)CCC3(C)C</chem>                              | 1XAP_A         |
| <chem>O=C(O)c1cc(F)c(cc1)NC(=O)[C@H](O)c(c2)ccc(c23)C(C)(C)CCC3(C)C</chem>                     | 1EXA_A         |
| <chem>O=C(O)c1cc(F)c(cc1)NC(=O)[C@@H](O)c(c2)ccc(c23)C(C)(C)CCC3(C)C</chem>                    | 1EXX_A         |
| <chem>O=C(O)c(c1)ccc(c12)cc(cc2)[C@H](O)c(c3)ccc(c34)C(C)(C)CCC4(C)C</chem>                    | 1FCX_A         |
| <chem>c1cc(C(=O)O)cc(c12)ccc(c2)C(=O)c(c3)ccc(c34)C(C)(C)CCC4(C)C</chem>                       | 1FCY_A         |
| <chem>O=C(O)c1ccc(cc1)\C=C(\C(=O)c(c2)ccc(c23)C(C)(C)CCC3(C)C</chem>                           | 1FCZ_A         |
| <chem>c1cc(C(=O)O)cc(c12)ccc(c2)C(=N/O)\c(c3)ccc(c34)C(C)(C)CCC4(C)C</chem>                    | 1FD0_A         |
| <chem>O=C(O)\C=C(C)\C=C\C=C(C)\C=C\C(C1(C)C)=C(C)CCC1</chem>                                   | 2LBD_A         |
| <chem>O=C(O)\C=C(C)\C=C\C=C(C)/C=C/C(C1(C)C)=C(C)CCC1</chem>                                   | 3LBD_A         |
| <chem>O=C(O)c1cc(F)c(cc1)NC(=O)[C@@H](O)c(c2)ccc(c23)C(C)(C)CCC3(C)C</chem>                    | 4LBD_A         |
| <chem>CCO[C@H](C(=O)O)Cc1ccc(cc1)OCCc2ccc(cc2)OS(=O)(=O)C</chem>                               | 1I7G_A         |
| <chem>c1cccc1C(=O)\C=C(\C)N[C@H](C(=O)O)Cc2ccc(cc2)OCCc3=NC(OC3C)c4cccc4</chem>                | 1K7L_A         |
| <chem>c1cc(C(F)F)ccc1C(=O)\C=C(\C)N[C@H](CNC(=O)CC)Cc2ccc(cc2)OCCc3c(C)oc(n3)-c4cccc4</chem>   | 1KKQ_A         |
| <chem>CCCON=C(C)[C@H](C(=O)O)Cc1ccc(cc1)OCc2c(C)oc(n2)-c3cccc3</chem>                          | 2NPA_A         |
| <chem>O=C(O)C(C)(C)Oc(cc1)ccc1CNC(=O)c2c(C)nc(s2)-c(cc3)ccc3C(F)F</chem>                       | 2P54_A         |
| <chem>COc(cc1)ccc1N2[C@H](C(=O)O)[C@@H](C2=O)Cc3cc(ccc3)OCCc4c(C)oc(n4)-c5cccc5</chem>         | 2REW_A         |
| <chem>CC[C@H](C(=O)O)Cc(c1)ccc(OCCC)c1CNC(=O)c2ccc(cc2)C34[C@@H]5C[C@H](C3)C[C@H](C4)C5</chem> | 2ZNN_A         |
| <chem>COc(c1)ccc(c12)n(cc2CCC(=O)O)S(=O)(=O)c(cc3)ccc3OC</chem>                                | 3ET1_A         |
| <chem>CO[C@H](C(=O)O)Cc(c12)sc(c1)ccc2OCCC3=NC(OC3C)c4cccc4</chem>                             | 3G8I_A         |
| <chem>O=C(O)C(C)(C)Oc(cc1)ccc1CCCN(C(=O)Nc(c2Cl)cccc2Cl)CCc3c(F)cccc3Cl</chem>                 | 1GWX_A         |
| <chem>CC[C@@](C)(C(=O)O)Oc(cc1)ccc1CCN(CCCCC)C(=O)Nc2c(F)cc(F)cc2</chem>                       | 1Y0S_A         |

| Cognate Ligand (SMILE)                                                                      | PDB code_Chain |
|---------------------------------------------------------------------------------------------|----------------|
| <chem>O=C(O)CCCCCCCC/C=C\CCCCC</chem>                                                       | 2AWH_A         |
| <chem>O=C(O)CCCCCCCC/C=C\CCCCC</chem>                                                       | 2B50_A         |
| <chem>O=C(O)CCCCCCCC/C=C\CCCCC</chem>                                                       | 2BAW_A         |
| <chem>c1cccc1-c2onc(-c(ccc3)cc3CC(=O)O)c2C(=O)NCCOc4c(Cl)cc(Cl)cc4</chem>                   | 2J14_A         |
| <chem>CC[C@H](C(=O)O)Cc(c1)ccc(OCCc)C1CNC(=O)C2C(F)cc(C(F)F)cc2</chem>                      | 2ZNP_A         |
| <chem>CC[C@H](C(=O)O)Cc(c1)ccc(OC)c1CNC(=O)C2C(F)cc(C(F)F)cc2</chem>                        | 2ZNO_A         |
| <chem>O=C(O)COc1ccc(cc1)OCCCOc(cc2)c(CCC)c(O)c2C(=O)C</chem>                                | 3D5F_A         |
| <chem>c1cccc(c1C(=O)O)NC(=O)c2cc(ccc2)S(=O)(=O)N(CC3)Cc(c34)cccc4</chem>                    | 3DY6_A         |
| <chem>COc(c1)ccc(c12)n(cc2CCC(=O)O)S(=O)(=O)c(cc3)ccc3OC</chem>                             | 3ET2_A         |
| <chem>FC(F)F)c1ccc(cc1)OCc2cc(OCC#C)c(cc2)Sc(c(C)c3C)ccc3OCC(=O)O</chem>                    | 3GZ9_A         |
| <chem>N1C=CCC=C1N(C)CCOc(cc2)ccc2C[C@H](C3=O)SC(=O)N3</chem>                                | 1FM6_D         |
| <chem>c1cccc1C(=O)c2c(ccc2)N[C@H](C(=O)O)Cc3ccc(cc3)OCCc4c(C)oc(n4)-c5cccc5</chem>          | 1FM9_D         |
| <chem>CCO[C@H](C(=O)O)Cc1ccc(cc1)OCCc2ccc(cc2)OS(=O)(=O)C</chem>                            | 1I7L_A         |
| <chem>CCO[C@H](C(=O)O)Cc1ccc(cc1)OCCn(c2ccc3)c(c4c23)cccc4</chem>                           | 1KNU_A         |
| <chem>CCO[C@H](C(=O)O)Cc1ccc(cc1)OCCN2c(ccc3)j3Oc(c24)cccc4</chem>                          | 1NYX_A         |
| <chem>c1cccc1C(=O)c2c(ccc2)N[C@H](C(=O)O)Cc3ccc(cc3)OCCc4c(C)oc(n4)-c5cccc5</chem>          | 1RDT_D         |
| <chem>c1cc(Cl)cc(Cl)c1C(=O)Nc(c2C(=O)O)ccc(c2)Oc3ncccn3</chem>                              | 1WM0_X         |
| <chem>CC(C)c(cc1)ccc1[C@H](C(=O)O)Oc(c(c2)CCC)c(CCC)c(c23)on(C)c3=O</chem>                  | 1ZE0_A         |
| <chem>N1C=CCC=C1N(C)CCOc(cc2)ccc2C[C@H](C3=O)SC(=O)N3</chem>                                | 1ZGY_A         |
| <chem>O=C(O)Cn(cc1)c(c12)ccc(c2)OCCCOc(cc3)c(CCC)c(c34)onc4C(F)F</chem>                     | 2ATH_A         |
| <chem>O=C(O)Cn(cc1)c(c12)ccc(c2)OCCCOc(c3CCC)ccc(c34)cc(cc4)C(=O)c5cccc5</chem>             | 2F4B_A         |
| <chem>COc(cc1)c(OC)cc1Cc(c(c23)cc(OC)c(c3)OC)ncc2C[NH2](CC4)CC[C@H]4c5c(OC)cccc5</chem>     | 2FVJ_A         |
| <chem>s1cccc1-c2cc(NS(=O)(=O)c(cc3F)ccc3)n(n2)-c4ccc(F)cc4</chem>                           | 2G0G_A         |
| <chem>FC(F)F)c1cc(C(F)F)cc(c1)S(=O)(=O)Nc(cc2-c3cccc3)n(n2)-c4ccc(F)cc4</chem>              | 2G0H_A         |
| <chem>CCO[C@H](C(=O)O)Cc(c1)ccc(c12)n(cc2)Cc3c(C)oc(n3)-c4c(Cl)cccc4</chem>                 | 2GTK_A         |
| <chem>O=C(O)COc(c1)ccc(c12)n(cc2)CCCOc(c3CCC)ccc(c34)cc(cc4)C(=O)c5cccc5</chem>             | 2HWQ_A         |
| <chem>O=C(O)C(C)Oc1cccc(c12)n(cc2)CCCOc(c3CCC)ccc(c34)cc(cc4)C(=O)c5cccc5</chem>            | 2HWR_A         |
| <chem>CC[C@](C)(C(=O)O)Oc(cc1)ccc1CCN(CCCCCC)c(n2)oc(c23)cccc3</chem>                       | 2I4J_A         |
| <chem>CC[C@](C)(C(=O)O)Oc(cc1)ccc1CCN(CCCCCC)c(n2)oc(c23)cccc3</chem>                       | 2I4P_A         |
| <chem>CC[C@](C)(C(=O)O)Oc(cc1)ccc1CCN(CCCCCC)c(n2)oc(c23)cccc3</chem>                       | 2I4Z_A         |
| <chem>CCCCCC(C)C(c(c1O)cc(c12)OC(C)C)[C@H]3[C@H]2CC(C(=O)O)=CC3</chem>                      | 2OM9_A         |
| <chem>O=C(O)[C@H](C)Oc(c1)ccc(Cl)c1Cn(c(c23)cc(cc3)OC(F)F)c(C)c2-c4noc(c45)cc(cc5)OC</chem> | 2P4Y_A         |
| <chem>c1cccc1C(=O)c2c(ccc2)N[C@H](CNC(=O)C)Cc3ccc(cc3)OCCc4c(C)oc(n4)-c5cccc5</chem>        | 2POB_A         |
| <chem>N1C=CCC=C1N(C)CCOc(cc2)ccc2C[C@H](C3=O)SC(=O)N3</chem>                                | 2PRG_A         |
| <chem>c1cccc(O[C@H](C)C(=O)O)c1Cc2c(C)n(c(c23)ccc(c3)OC(F)F)C(=O)c4ccc(cc4)OC</chem>        | 2Q59_A         |
| <chem>c1cccc1Sc2c(C(=O)O)n(c(c23)ccc(Cl)c3)Cc4cc(OC)ccc4</chem>                             | 2Q6R_A         |
| <chem>c1cc(Cl)cc(Cl)c1C(=O)Nc(c2C(=O)O)ccc(c2)Oc3ncccn3</chem>                              | 2Q6S_B         |
| <chem>O=C(O)CCCCC\C=C\C=C/[C@H](O)CCCC</chem>                                               | 2VST_A         |
| <chem>O=C(O)CC/C=C\C/C=C\C/C=C\C/C=C\C/C=C\C/C=C\C/C=C\C/C=C\C/C</chem>                     | 2VV0_A         |
| <chem>O=C(O)CC[C@H](O)\C=C\C=C\C=C\C=C\C=C\C=C\C=C\C/C=C\C/C</chem>                         | 2VV1_A         |



| Cognate Ligand (SMILE)                                                                                    | PDB code_Chain |
|-----------------------------------------------------------------------------------------------------------|----------------|
| <chem>O=C(O)CCC[C@H](O)C=C\C/C=C\C/C=C\C/C=C\C/C=C\C</chem>                                               | 2VV2_A         |
| <chem>O=C(O)CCC(=O)C/C=C/C/CC/C=C\C/C=C\C/C=C\C/C=C\C/C=C\C</chem>                                        | 2VV3_A         |
| <chem>O=C(O)CCCCC(=O)C[C@H](O)/C=C\C/C=C\C\CCCC</chem>                                                    | 2VV4_A         |
| <chem>O=C(O)CCC/C=C\C[C@H]1C=CC(=O)/C1=C/C=C\C\CCCC</chem>                                                | 2ZK1_A         |
| <chem>O=C(O)CCC/C=C\C[C@H]1C=CC(=O)\C1=C/C=C\C\CCCC</chem>                                                | 2ZK2_A         |
| <chem>O=C(O)CCC/C=C\C\CC(=O)/C=C/C=C\C\C=C\C\CCCC</chem>                                                  | 2ZK3_A         |
| <chem>CCCCC(=O)/C=C/C=C\C/C=C\C\C/C=C\C\CCCC(=O)O</chem>                                                  | 2ZK4_A         |
| <chem>CCC/C([N+][O-])=O=C/c1ccc(o1)-c(ccc2)cc2C(=O)O</chem>                                               | 2ZK5_A         |
| <chem>CC[C@H](C(=O)O)Cc1cc(ccc1)CNC(=O)c2ccc(cc2)C34C[C@@H]5[C@H](C3)C[C@H](C4)C5</chem>                  | 2ZNO_A         |
| <chem>O=C(O)CCC/C=C\C[C@H]1C=CC(=O)/C1=C/C=C\C\CCCC</chem>                                                | 2ZVT_A         |
| <chem>c1ccccc1C[C@H](C(=O)O)Oc(cc2)ccc2-c3ccccc3</chem>                                                   | 3B3K_A         |
| <chem>c1ccccc1-n(n2)nc(c2CC(=O)O)Cc3cc(ccc3)OCCc4c(C)oc(n4)-c5ccccc5</chem>                               | 3BC5_A         |
| <chem>c1ccccc1C[C@H](C(=O)O)Oc2ccc(Cl)cc2</chem>                                                          | 3CDP_A         |
| <chem>c1ccccc1C[C@H](C(=O)O)Oc(cc2)ccc2CC</chem>                                                          | 3CDS_A         |
| <chem>N1C=CCC=C1N(C)CCOc(cc2)ccc2C[C@H](C3=O)SC(=O)N3</chem>                                              | 3CS8_A         |
| <chem>CCCC/C=C\C/C([N+][O-])=O=C\CCCCCCCC(=O)O</chem>                                                     | 3CWD_A         |
| <chem>c1cc(Cl)cc(Cl)c1C(=O)Nc(c2C(=O)O)ccc(c2)Oc3ncccn3</chem>                                            | 3DZU_D         |
| <chem>N1C=CCC=C1N(C)CCOc(cc2)ccc2C[C@H](C3=O)SC(=O)N3</chem>                                              | 3DZY_D         |
| <chem>[O-][N+](=O)c(c1)ccc(Cl)c1C(=O)Nc2ccccc2</chem>                                                     | 3E00_D         |
| <chem>COc(c1)ccc(c12)n(cc2CCC(=O)O)S(=O)(=O)c(cc3)ccc3OC</chem>                                           | 3ET3_A         |
| <chem>CCO[C@H](C(=O)O)Cc1c(C)cc(cc1)OCc2csc(n2)-c3ccc(Cl)cc3</chem>                                       | 3FEI_A         |
| <chem>CCO[C@H](C(=O)O)Cc1c(C)cc(cc1)OCc2csc(n2)-c3ccc(Cl)cc3</chem>                                       | 3FEJ_A         |
| <chem>c1cccc(c12)ncc(c2)Oc3c(Cl)cc(cc3Cl)NS(=O)(=O)c4c(Cl)cc(Cl)cc4</chem>                                | 3FUR_A         |
| <chem>CO[C@H](C(=O)O)Cc(c(c12)sc1)ccc2OCCc3c(C)oc(n3)-c4ccccc4</chem>                                     | 3G9E_A         |
| <chem>FC(F)(F)c1ccc(cc1)OCc2cc(OCC#CC)c(cc2)Sc(c(c34)CCCC4)ccc3OCC(=O)O</chem>                            | 3H0A_D         |
| <chem>c1ccccc1C[C@H](C(=O)O)Oc(cc2)ccc2Cc3ccccc3</chem>                                                   | 3H00_A         |
| <chem>CCOP(=O)(OCC)/C(P(=O)(OCC)OCC)=C/c(c1)cc(C(C)(C)C)c(O)c1C(C)(C)C</chem>                             | 3HOD_A         |
| <chem>n1ccnn1[C@H](C(=O)O)Cc2ccc(cc2)CCCc3c(C)oc(n3)-c4ccccc4</chem>                                      | 3IA6_B         |
| <chem>C1C=CCC=C1CN(C[C@H]2C=CC=CC2)C(=O)C[C@H](C3=O)S[C@@H](CCCCC)N3CCCCc(cc4)ccc4C(=O)O</chem>           | 4PRG_A         |
| <chem>CC(C)CCC[C@H](C)[C@H]1CC[C@H]([C@H]12C)[C@H]3[C@H](CC2)[C@]4(C)C(=CC3)C[C@H](O)CC4</chem>           | 1N83_A         |
| <chem>CC(C)CCC[C@H](C)[C@H]1CC[C@H]([C@H]12C)[C@H]3[C@H](CC2)[C@]4(C)C(=CC3)C[C@H](CC4)OS(=O)(=O)O</chem> | 1S0X_A         |
| <chem>CC1(C)[C@H](O1)CC[C@H](C)[C@H]2CC[C@H]([C@H]23C)[C@H]4[C@H](CC3)[C@]5(C)C(=CC4)C[C@H](O)CC5</chem>  | 1P8D_A         |
| <chem>O=C(O)Cc1cc(ccc1)OCCCN(Cc(c(Cl)c2C(F)(F)F)ccc2)CC(c3ccccc3)c4ccccc4</chem>                          | 1PQ6_A         |
| <chem>FC(F)(F)C(C(F)(F)F)(O)c1ccc(cc1)NCC(F)(F)F</chem>                                                   | 1PQ9_A         |
| <chem>FC(F)(F)C(C(F)(F)F)(O)c1ccc(cc1)N(CC(F)(F)F)S(=O)(=O)c2ccccc2</chem>                                | 1PQC_A         |
| <chem>FC(F)(F)C(C(F)(F)F)(O)c1ccc(cc1)N(CC(F)(F)F)S(=O)(=O)c2ccccc2</chem>                                | 1UPV_A         |
| <chem>FC(F)(F)C(C(F)(F)F)(O)c1ccc(cc1)N(CC(F)(F)F)S(=O)(=O)c2ccccc2</chem>                                | 1UPW_A         |
| <chem>c1ccc(C(F)(F)F)c(c12)nccc2-c3cc(ccc3)Oc4cc(S(=O)(=O)C)ccc4</chem>                                   | 3KFC_A         |
| <chem>FC(F)(F)C(C(F)(F)F)(O)c1ccc(cc1)N(CC(F)(F)F)S(=O)(=O)c2ccccc2</chem>                                | 1UHL_B         |
| <chem>c1ccccc1CN(C2=O)C(=O)C(=C2c3ccccc3)Nc4ccc(cc4)OC</chem>                                             | 2ACL_B         |

| Cognate Ligand (SMILE)                                                                                                                                     | PDB code_Chain |
|------------------------------------------------------------------------------------------------------------------------------------------------------------|----------------|
| <chem>FC(F)(F)C(C(F)(F)F)(O)c1ccc(cc1)N(CCCC)Cc2cc(OC)c(c(Cl)c2)OC</chem>                                                                                  | 3FAL_B         |
| <chem>O=C(O)Cn(cc1)c(c12)cccc2OCCCN(Cc(c(Cl)c3C(F)(F)F)ccc3)CC(c4cccc4)c5ccccc5</chem>                                                                     | 3FC6_B         |
| <chem>COC(=O)CCc1cc(ccc1)N(C(=O)C2CCCC2)Cc3ccc(cc3)-c4ccc(cc4)N(C)C</chem>                                                                                 | 1OSH_A         |
| <chem>c1cc(O)ccc1C(=O)[C@H]2CC[C@H]([C@@]23C)[C@H]4[C@H](CC3)[C@]5(C)C(=CC4)C=C(C(=O)O)CC5</chem>                                                          | 3BEJ_A         |
| <chem>O=C(O)c1cc(ccc1)C=Cc2c(Cl)cc(cc2)OCc3c(C(C)C)onc3-c4c(Cl)cccc4Cl</chem>                                                                              | 3DCT_A         |
| <chem>c1cc(F)c(F)cc1C(=O)N(C=C2C(=O)OC(C)C)CC(C)[C@H]3[C@H]2Nc(c34)cccc4</chem>                                                                            | 3FLI_A         |
| <chem>O=C(O)c1cc(ccc1)C=Cc2c(Cl)cc(cc2)OCc3c(C(C)C)onc3C[S@@](=O)c4c(Cl)cccc4Cl</chem>                                                                     | 3GD2_A         |
| <chem>c1cc(F)cc2[nH]c(c3c12)C(C(=O)OC(C)C)=CN(CC3(C)C)C(=O)c4ccc(cc4)OCCCN5CCOCC5</chem>                                                                   | 3L1B_A         |
| <chem>C1CCCC1NC(=O)[C@H](C2CCCC2)n3c(-c4ccc(Cl)cc4)nc(c35)ccc(c5)C(=O)O</chem>                                                                             | 3OKH_A         |
| <chem>C1CCCC1NC(=O)[C@H](C2CCCC2)n(c(c34)cccc3)c(n4)-c5ccc(Cl)cc5</chem>                                                                                   | 3OKI_A         |
| <chem>O=C(O)c1cc(C)c(cc1)NC(=O)[C@H](C2CCCC2)n(c(c34)cc(F)c(F)c3)c(n4)-c5ccc(Cl)cc5</chem>                                                                 | 3OLF_A         |
| <chem>c1cccc(c1)NC(=O)[C@H](C2CCCC2)n(c(c34)cc(F)c(F)c3)c(n4)-c5ccc(Cl)cc5</chem>                                                                          | 3OMK_A         |
| <chem>O=C(O)c1cc(F)c(cc1)NC(=O)[C@H](C2CCCC2)n(c(c34)cc(F)c(F)c3)c(n4)-c5ccc(Cl)cc5</chem>                                                                 | 3OMM_A         |
| <chem>O=C(O)c1ccc(cc1)NC(=O)[C@H](C2CCCC2)n(c(c34)cc(F)c(F)c3)c(n4)-c5ccc(Cl)cc5</chem>                                                                    | 3OOF_A         |
| <chem>O=C(O)c1cc(F)c(c(F)c1)NC(=O)[C@H](C2CCCC2)n(c(c34)cc(F)c(F)c3)c(n4)-c5ccc(Cl)cc5</chem>                                                              | 3OOK_A         |
| <chem>CC(C)(O)CCC[C@@H](C)[C@H]1CC[C@H]([C@@]12C)\C(CCC2)=C\C=C3/C(=C)[C@H](O)C[C@@H](C3)O</chem>                                                          | 1DB1_A         |
| <chem>CCC(O)(CC)CCCO[C@H](C)[C@H]1CC[C@H]([C@@]12C)\C(CCC2)=C\C=C3/C(=C)[C@H](O)C[C@@H](C3)O</chem>                                                        | 1IE8_A         |
| <chem>CC(C)(O)CCC[C@H](C)[C@H]1CC[C@H]([C@@]12C)\C(CCC2)=C\C=C3/C(=C)[C@H](O)C[C@@H](C3)O</chem>                                                           | 1IE9_A         |
| <chem>CCC(O)(CC)C=C/C=C/[C@@H](C)[C@H]1CC[C@H]([C@@]12C)\C(CCC2)=C\C=C3/C(=C)[C@H](O)C[C@@H](C3)O</chem>                                                   | 1S0Z_A         |
| <chem>C1CC1[C@H](O)C=C[C@@H](C)[C@H]2CC[C@H]([C@@]23C)\C(CCC3)=C\C=C4/C(=C)[C@H](O)C[C@@H](C4)O</chem>                                                     | 1S19_A         |
| <chem>CC(C)(O)C#CC[C@@H](C)[C@H]1CCC([C@@]12C)\C(CCC2)=C\C=C3/C(=C)[C@H](O)C[C@@H](C3)O</chem>                                                             | 1TXI_A         |
| <chem>CC(C)(O)CCC[C@@H](C)[C@H]1CC[C@H]([C@@]12C)\C(CCC2)=C\C=C3/C(=C)[C@H](O)C[C@@H](C3)O)CCC</chem>                                                      | 2HAM_A         |
| <chem>CC(C)(O)CCC[C@@H](C)[C@H]1CC[C@H]([C@@]12C)\C(CCC2)=C\C=C3/C(=C)[C@H](O)C[C@@H](C3)O)OCCCO</chem>                                                    | 2HAR_A         |
| <chem>CC(C)(O)CCC[C@@H](C)[C@H]1CC[C@H]([C@@]12C)\C(CCC2)=C\C=C3/C(=C)[C@H](O)C[C@@H](C3)O)OCCC</chem>                                                     | 2HAS_A         |
| <chem>CC(C)(O)CCC[C@@H](C)[C@H]1CC[C@H]([C@@]12C)\C(CCC2)=C\C=C3/C(=C)[C@H](O)C[C@@H](C3)O)CCCO</chem>                                                     | 2HB7_A         |
| <chem>CC(C)(O)CCC[C@@H](C)[C@H]1CC[C@H]([C@@]12C)\C(CCC2)=C\C=C3/C(=C)[C@H](O)C[C@@H](C3)O</chem>                                                          | 2HB8_A         |
| <chem>CC(C)(O)C[C@H](CO)C[C@@]1(C)[C@H]2CC[C@H]([C@@]23C)\C(CCC3)=C\C=C4/C(=C)[C@H](O)C[C@@H](C4)O</chem>                                                  | 3CS4_A         |
| <chem>CC(C)(O)C[C@H](CO)C[C@@]1(C)[C@H]2CC[C@H]([C@@]23C)\C(CCC3)=C\C=C4/C(=C)[C@H](O)C[C@@H](C4)O</chem>                                                  | 3CS6_A         |
| <chem>CCOP(=O)(OCC)/C(P(=O)(OCC)OCC)=C/c(c1)cc(C(C)C)c(O)c1C(C)C</chem>                                                                                    | 1ILH_A         |
| <chem>C/C(C)=C/CC[C@]1(C)[C@H](C\C=C\C(C)C)C[C@@]1(C)[C@H](C\C=C\C(C)C)C(=O)C(=C2O)C\C=C\C(C)C</chem>                                                      | 1M13_A         |
| <chem>CCOP(=O)(OCC)/C(P(=O)(OCC)OCC)=C/c(c1)cc(C(C)C)c(O)c1C(C)C</chem>                                                                                    | 1NRL_A         |
| <chem>O1C=C[C@H](OC)[C@@H](C)[C@H](OC(=O)C)[C@H](O)[C@H](O)[C@H](O)[C@H](O)C=C\C(C)C(=O)Nc(c2O)c/C=N/N(C3)CCN3C)c(O)c4c2c(O)c(O)c(O)c4C(=O)[C@@]15C</chem> | 1SKX_A         |
| <chem>FC(F)(F)C(C(F)(F)F)(O)c1ccc(cc1)N(C(C(F)(F)F)S(=O)(=O)c2ccccc2</chem>                                                                                | 2O9I_A         |
| <chem>C/C(C)=C/CC1(C\C=C\C(C)C)C(=O)C(C(=O)C(C)C)C(=O)C(C1=O)C\C=C\C(C)C</chem>                                                                            | 2QNV_A         |
| <chem>c1ccccc1C[C@H](C(=O)O)Oc(cc2)ccc2CCc3ccccc3</chem>                                                                                                   | 3HLV_B         |
| <chem>CC(=O)[C@H]1CC[C@H]([C@@]12C)[C@H]3[C@H](CC2)[C@]4(C)[C@H](CC3)CC(=O)CC4</chem>                                                                      | 1XV9_B         |
| <chem>c1cc(Cl)ccc1-c(n2)c(n(c23)ccs3)/C=N/OCc4cc(Cl)c(Cl)cc4</chem>                                                                                        | 1XVP_B         |
| <chem>O=C(O)CCCCCCCCCCCCC</chem>                                                                                                                           | 1PZL_A         |
| <chem>O=C(O)CCCCCCCCCCCCC</chem>                                                                                                                           | 3FS1_A         |
| <chem>O=C(O)CCCCCCCCCCCCC</chem>                                                                                                                           | 1LV2_A         |

| Cognate Ligand (SMILE)                                                              | PDB code_Chain |
|-------------------------------------------------------------------------------------|----------------|
| <chem>O=C(O)\C=C(C)\C=C\C=C(C)/C=C/C(C1(C)C)=C(C)CCC1</chem>                        | 1FBY_A         |
| <chem>O=C(O)\C=C(C)\C=C\C=C(C)/C=C/C(C1(C)C)=C(C)CCC1</chem>                        | 1FM6_A         |
| <chem>O=C(O)\C=C(C)\C=C\C=C(C)/C=C/C(C1(C)C)=C(C)CCC1</chem>                        | 1FM9_A         |
| <chem>O=C(O)\C=C(C)\C=C\C=C(C)\C=C\C(C1(C)C)=C(C)CCC1</chem>                        | 1G5Y_A         |
| <chem>O=C(O)\C=C(C)\C=C\C=C(C)/C=C/C(C1(C)C)=C(C)CCC1</chem>                        | 1K74_A         |
| <chem>O=C(O)CCCCCCCCCCC/C=C/CCCCCCCC</chem>                                         | 1MV9_A         |
| <chem>O=C(O)c1ccc(cc1)C2(OCCO2)c(c3)ccc(c34)C(C)(C)CCC4(C)C</chem>                  | 1MVC_A         |
| <chem>O=C(O)c1ccc(cc1)C2(OCCO2)c(c3)ccc(c34)C(C)(C)CCC4(C)C</chem>                  | 1MZN_A         |
| <chem>O=C(O)/C=C/c(c1)oc(c12)cccc2-c(c3)ccc(c34)C(C)(C)CCC4(C)C</chem>              | 1RDT_A         |
| <chem>O=C(O)\C=C(C)\C=C\C=C(C)/C=C/C(C1(C)C)=C(C)CCC1</chem>                        | 1XLS_A         |
| <chem>O=C(O)CCCCCCCCCCCC</chem>                                                     | 1XV9_A         |
| <chem>O=C(O)CCCCCCCCCCCC</chem>                                                     | 1XVP_A         |
| <chem>O=C(O)\C=C(C)\C=C\C=C(C)/C=C/C(C1(C)C)=C(C)CCC1</chem>                        | 2ACL_A         |
| <chem>O=C(O)/C=C/c1cc(c(O)cc1)-c(c2)c(OC)cc(c23)C(C)(C)CCC3(C)C</chem>              | 2P1T_A         |
| <chem>O=C(O)/C=C/c1cc(c(O)cc1)-c(c2)c(OC)cc(c23)C(C)(C)CCC3(C)C</chem>              | 2P1U_A         |
| <chem>O=C(O)/C=C/c1cc(c(O)cc1)-c(c2)c(OCCC)cc(c23)C(C)(C)CCC3(C)C</chem>            | 2P1V_A         |
| <chem>O=C(O)c1ccc(cc1)C2(OCCO2)c(c3)ccc(c34)C(C)(C)CC4(C)C</chem>                   | 2ZXZ_A         |
| <chem>O=C(O)c1ccc(cc1)C2(OCCO2)c(c3)ccc(c34)[Si](C)(C)[Si]4(C)C</chem>              | 2ZY0_A         |
| <chem>O=C(O)\C=C(C)\C=C\C=C(C)/CCC(C1(C)C)=C(C)CCC1</chem>                          | 3DZU_A         |
| <chem>O=C(O)\C=C(C)\C=C\C=C(C)/CCC(C1(C)C)=C(C)CCC1</chem>                          | 3DZY_A         |
| <chem>O=C(O)\C=C(C)\C=C\C=C(C)/CCC(C1(C)C)=C(C)CCC1</chem>                          | 3E00_A         |
| <chem>O=C(O)\C=C(C)\C=C\C=C(C)/C=C/C(C1(C)C)=C(C)CCC1</chem>                        | 3FAL_A         |
| <chem>O=C(O)\C=C(C)\C=C\C=C(C)/C=C/C(C1(C)C)=C(C)CCC1</chem>                        | 3FC6_A         |
| <chem>c1cc(C=O)ccc1C(=C)c(c2)c(C)cc(c23)C(C)(C)CCC3(C)C</chem>                      | 3H0A_A         |
| <chem>O=C(O)c1ccc(nc1)C2(CC2)c(c(C)c3)cc(c34)C(C)(C)CCC4(C)C</chem>                 | 1H9U_A         |
| <chem>O=C(O)\C=C(C)\C=C\C=C(C)C@H](C)CCCC(C)(C)OC</chem>                            | 1UHL_A         |
| <chem>O[C@H]1CC[C@H]([C@@]12C)[C@H]3[C@H](CC2)c4c(CC3)cc(O)cc4</chem>               | 1A52_A         |
| <chem>O[C@H]1CC[C@H]([C@@]12C)[C@H]3[C@H](CC2)c4c(CC3)cc(O)cc4</chem>               | 1ERE_A         |
| <chem>c1cc(O)cc(c12)sc(-c3ccc(O)cc3)c2C(=O)c4ccc(cc4)OCC[NH2]5CCCC5</chem>          | 1ERR_A         |
| <chem>O[C@H]1CC[C@H]([C@@]12C)[C@H]3[C@H](CC2)c4c(CC3)cc(O)cc4</chem>               | 1G50_A         |
| <chem>c1cc(O)cc(c12)sc(c2)-c3ccc(O)cc3</chem>                                       | 1GWQ_A         |
| <chem>O[C@H]1CC[C@H]([C@@]12C)[C@H]3[C@H](CC2)c4c(CC3)cc(O)cc4</chem>               | 1GWR_A         |
| <chem>c1c(O)ccc2c1[C@@]1(C)C3=C2[C@H](C)C(c34)cc(O)cc4</chem>                       | 1L2I_A         |
| <chem>O[C@H]1CC[C@H]([C@@]12C)[C@H]3[C@H](CC2)c4c(CC3)cc(O)cc4</chem>               | 1PCG_A         |
| <chem>O[C@H]1CC[C@H]([C@@]12C)[C@H]3[C@H](CC2)c4c(CC3)cc(O)cc4</chem>               | 1QKT_A         |
| <chem>O[C@H]1CC[C@H]([C@@]12C)[C@H]3[C@H](CC2)c4c(CC3)cc(O)cc4</chem>               | 1QKU_A         |
| <chem>c1cccc1C(CC)=C(c2cccc2)/c3ccc(cc3)\C=C\C(=O)O</chem>                          | 1R5K_A         |
| <chem>C1CCCC[NH2]1CCOc(cc2)ccc2[C@H](O3)[C@@]1(C)C4ccc(O)cc4)Sc(c35)cc(O)cc5</chem> | 1SJ0_A         |
| <chem>C1CCCC[NH2]1CCOc(cc2)ccc2[C@H]3N(c4cccc4)CCc(c35)cc(O)cc5</chem>              | 1UOM_A         |
| <chem>c1c(O)cc(CC#N)c(c12)OC(C2)c3ccc(O)cc3</chem>                                  | 1X7E_A         |

| Cognate Ligand (SMILE)                                                                           | PDB code_Chain |
|--------------------------------------------------------------------------------------------------|----------------|
| <chem>Oc1cc(O)cc(c12)occ(c2=O)-c3ccc(O)cc3</chem>                                                | 1X7R_A         |
| <chem>C[C@@H]1[C@@H](C)C[NH2](C1)CCOc(cc2)ccc2[C@H](O3)[C@@H](c4ccc(O)cc4)Sc(c35)cc(O)cc5</chem> | 1XP1_A         |
| <chem>C[C@H]1[C@H](C)C[NH2](C1)CCOc(cc2)ccc2[C@H](O3)[C@@H](c4ccc(O)cc4)Sc(c35)cc(O)cc5</chem>   | 1XP6_A         |
| <chem>C1CCC[NH2]1[C@@H](C)COc(cc2)ccc2[C@H](O3)[C@@H](c4ccc(O)cc4)Sc(c35)cc(O)cc5</chem>         | 1XP9_A         |
| <chem>C1CCC[NH2]1[C@H](C)COc(cc2)ccc2[C@H](O3)[C@@H](c4ccc(O)cc4)Sc(c35)cc(O)cc5</chem>          | 1XPC_A         |
| <chem>c1cc(O)cc(c12)CCN(c3cccc3)[C@@H]2c4ccc(cc4)N(C5)CC[NH2]([C@H]56)CCCC6</chem>               | 1XQC_A         |
| <chem>C1CCC[NH2]1CCOc(cc2)ccc2[C@H](Oc(c34)ccc(c3O))[C@H]([C@@H]4C)c5ccc(O)cc5</chem>            | 1YIM_A         |
| <chem>C1CCC[NH2]1CCOc(cc2)ccc2[C@H](Oc(c34)ccc(c3F)O)[C@H]([C@@H]4C)c5ccc(O)cc5</chem>           | 1YIN_A         |
| <chem>OC[C@]12[C@H](C)C=C(C)[C@H]([C@H]1C)[C@@H](OC2)c3ccc(O)cc3</chem>                          | 1ZKY_A         |
| <chem>C1CCCC[NH2]1CCOc2ccc(cc2)Oc3c(-c4ccc(cc4)S(=O)(=O)C)ccc(c35)cc(O)cc5</chem>                | 2AYR_A         |
| <chem>OC[C@]12CC=C(C)[C@H](C1)[C@H](OC2)c3ccc(O)cc3</chem>                                       | 2B1V_A         |
| <chem>C[C@@]1(O)CC[C@H]([C@@]12C)c3c(CC2)c4c(cc3)cc(O)cc4</chem>                                 | 2B1Z_A         |
| <chem>c1cccc1C(\CC)=C(c2ccc(O)cc2)/c3ccc(cc3)OCC[NH2](C)C</chem>                                 | 2BJ4_A         |
| <chem>OC[C@@]12[C@H](C)[C@@H]([C@@H](C)CC1)[C@H](OC2)c3ccc(O)cc3</chem>                          | 2FAI_A         |
| <chem>CC([C@@H]12)=CC[C@@H](C2)C(C)O[C@H]1c3ccc(O)cc3</chem>                                     | 2G44_A         |
| <chem>c1cc(O)ccc1[C@@H]([C@H]([C@@H]23)CCC2)Oc4c3cc(O)cc4</chem>                                 | 2I0G_A         |
| <chem>c1cc(O)ccc1[C@@H]([C@H]([C@@H]23)CCC2)Oc4c3cc(O)cc4</chem>                                 | 2I0J_A         |
| <chem>c1cccc(c12)[nH]c(-c3cccc3)c2CC(=O)N[C@H](C)CCc4ccc(O)cc4</chem>                            | 2IOK_A         |
| <chem>c1cccc1C(\CC)=C(c2ccc(O)cc2)/c3ccc(cc3)OCC[NH2](C)C</chem>                                 | 2JF9_A         |
| <chem>c1cc(O)cc(c12)sc(-c3ccc(O)cc3)c2C(=O)c4ccc(cc4)OCC[NH2]5CCCCC5</chem>                      | 2JFA_A         |
| <chem>O[C@H]1CC[C@H]([C@@]12C)[C@H]3[C@H](CC2)c4c(CC3)cc(O)cc4</chem>                            | 2OCF_A         |
| <chem>C1CCC[NH2]1CCOc(cc2)ccc2[C@H]3[C@@H](c4cccc4)CCc(c35)cc(O)cc5</chem>                       | 2OUZ_A         |
| <chem>c1cccc(c1C(F)(F)F)C=C[C@]2(O)CC[C@H]([C@@]23C)[C@H]4[C@H](CC3)c5c(CC4)cc(O)cc5</chem>      | 2P15_A         |
| <chem>c1cc(O)ccc1[C@@H]([C@H]([C@@H]23)CCC2)Oc4c3c(O)ccc4</chem>                                 | 2POG_A         |
| <chem>c1cc(O)ccc1[C@@H]([C@H]([C@@H]23)CC(F)(F)C2)Oc4c3cc(O)cc4</chem>                           | 2Q70_A         |
| <chem>c1cc(O)cc(c12)n[nH]c2-c3c(O)cc(O)cc3</chem>                                                | 2QA6_A         |
| <chem>Oc1cc(O)cc(c12)occ(c2=O)-c3ccc(O)cc3</chem>                                                | 2QA8_A         |
| <chem>c1cc(O)ccc1-n(c2CC)nc(c23)ccc(c3)O</chem>                                                  | 2QAB_A         |
| <chem>COCc1cc(O)cc2c1O[C@H]([C@H]([C@H]23)CCC3)c4ccc(O)cc4</chem>                                | 2QE4_A         |
| <chem>O[C@H]1CC[C@H]([C@@]12C)[C@H]3[C@H]([C@H](C2)COC)c4c(CC3)cc(O)cc4</chem>                   | 2QGT_A         |
| <chem>c1c(O)ccc(c12)nn(c2Cl)-c3ccc(O)cc3</chem>                                                  | 2QGW_A         |
| <chem>CCOC(=O)[C@@H]1[C@H](C(=O)OCC)[C@@H](O2)C(c3ccc(O)cc3)=C([C@H]12)c4ccc(O)cc4</chem>        | 2QH6_A         |
| <chem>COC(=O)C([C@H]12)=C(C(=O)OC)[C@H](O2)C(c3ccc(O)cc3)=C1c4ccc(O)cc4</chem>                   | 2QR9_A         |
| <chem>Cn1c(N)nc(c12)ncc(c2)-c3ccc(O)cc3</chem>                                                   | 2QSE_A         |
| <chem>Cn1c(N)nc(c12)ncc(c2)-c3cccc3</chem>                                                       | 2QXM_A         |
| <chem>c1cc(O)cc(c12)sc(-c3ccc(O)cc3)c2C(=O)c4ccc(cc4)OCC[NH2]5CCCCC5</chem>                      | 2QXS_A         |
| <chem>c1cc(O)cc(c12)sc(-c3ccc(O)cc3)c2C(=O)c4ccc(cc4)OCC[NH2](CC5)CC[C@]H5C</chem>               | 2R6W_A         |
| <chem>c1cc(O)cc(c12)sc(-c3ccc(O)cc3)c2C(=O)c4ccc(cc4)OCC[NH2]5CCCCC5</chem>                      | 2R6Y_A         |
| <chem>c1cc(O)cc(c12)cc(C)c(-c3cc(O)ccc3)c2Oc4ccc(O)cc4</chem>                                    | 3DT3_A         |
| <chem>c1cc(O)ccc1C(\CC)=C(/CC)c2ccc(O)cc2</chem>                                                 | 3ERD_A         |

| Cognate Ligand (SMILE)                                                                                                      | PDB code_Chain |
|-----------------------------------------------------------------------------------------------------------------------------|----------------|
| <chem>c1ccccc1C(\CC)=C(c2ccc(O)cc2)/c3ccc(cc3)OCC[NH2](C)C</chem>                                                           | 3ERT_A         |
| <chem>c1c(O)ccc2c1C[C@@H](CC)C3=C2[C@H](CC)Cc(c34)cc(O)cc4</chem>                                                           | 1L2J_B         |
| <chem>c1cc(Cl)ccc1CCCS(c2)nc(N3CC[NH3]CC3)nc2NCCc4ccc(O)cc4</chem>                                                          | 1NDE_A         |
| <chem>Oc1cc(O)cc(c12)occ(c2=O)-c3ccc(O)cc3</chem>                                                                           | 1QKM_A         |
| <chem>c1cc(O)cc(c12)sc(-c3ccc(O)cc3)c2C(=O)c4ccc(cc4)OCC[NH2]5CCCCC5</chem>                                                 | 1QKN_A         |
| <chem>c1cc(O)cc(c12)onc2-c3c(O)cc(O)cc3</chem>                                                                              | 1U3Q_A         |
| <chem>c1cc(O)cc(c12)OC(N2)c3cccc(c34)c(O)ccc4</chem>                                                                        | 1U3R_A         |
| <chem>c1cc(O)cc(c12)onc2-c3ccc(c34)cc(O)cc4</chem>                                                                          | 1U3S_A         |
| <chem>c1c(O)ccc(c12)OC(C2)c3ccc(O)cc3</chem>                                                                                | 1U9E_A         |
| <chem>c1c(O)cc(C#N)c(c12)oc(c2)-c3ccc(O)cc3</chem>                                                                          | 1X76_A         |
| <chem>c1c(O)cc(CC#N)c(c12)oc(c2)-c3ccc(O)cc3</chem>                                                                         | 1X78_A         |
| <chem>C=Cc1cc(O)cc(c12)nc(o2)-c3cc(F)c(O)cc3</chem>                                                                         | 1X7B_A         |
| <chem>Oc1cc(O)cc(c12)occ(c2=O)-c3ccc(O)cc3</chem>                                                                           | 1X7J_A         |
| <chem>Clc1c(O)ccc(c12)cc(cc2)-c3ccc(O)cc3</chem>                                                                            | 1YY4_A         |
| <chem>c1cc(O)c(F)cc1-c(cc2C#N)cc(c23)ccc(c3)O</chem>                                                                        | 1YYE_A         |
| <chem>c1c(O)ccc(c12)C(Br)=C(C2=O)c3ccc(O)cc3</chem>                                                                         | 1ZAF_A         |
| <chem>CCCC[C@@]12C(=C(Br)C(=O)CC2)c3c(C1)cc(O)cc3</chem>                                                                    | 2GIU_A         |
| <chem>COCc1cc(O)cc2c1O[C@H]([C@H]([C@H]23)CCC3)c4ccc(O)cc4</chem>                                                           | 2JJ3_A         |
| <chem>O/N=C\c1ccc(c(c12)cccc2)-c3ccc(O)cc3</chem>                                                                           | 2NV7_A         |
| <chem>COCc1cc(O)cc2c1O[C@H]([C@H]([C@H]23)CC(F)(F)C3)c4ccc(O)cc4</chem>                                                     | 2QTU_A         |
| <chem>c1cc(O)ccc1[C@@]1[C@H]([C@H]([C@H]23)CC(F)(F)C2)Oc4c3cc(O)cc4</chem>                                                  | 2Z4B_A         |
| <chem>C1CCCCC1C[NH3]Cc2cn(c(c23)cccc3)-c(cc4)ccc4C</chem>                                                                   | 2PJL_A         |
| <chem>c1cc(O)ccc1C(C)(C)c2ccc(O)cc2</chem>                                                                                  | 2E2R_A         |
| <chem>c1ccccc1C(\CCCO)=C(c2ccc(O)cc2)/c3ccc(cc3)OCC[NH2](C)C</chem>                                                         | 2EWP_A         |
| <chem>c1cc(O)ccc1C(=O)NNCc(cc2)ccc2C(C)C</chem>                                                                             | 2GPP_A         |
| <chem>c1ccccc1C(\CC)=C(c2ccc(O)cc2)/c3ccc(cc3)OCC[NH2](C)C</chem>                                                           | 2GPU_A         |
| <chem>c1ccccc1C(\CC)=C(c2ccc(O)cc2)/c3ccc(cc3)OCC[NH2](C)C</chem>                                                           | 2GPV_A         |
| <chem>c1cc(O)ccc1C(C)(C)c2ccc(O)cc2</chem>                                                                                  | 2P7G_A         |
| <chem>c1ccccc1C(\CC)=C(c2ccc(O)cc2)/c3ccc(cc3)OCC[NH2](C)C</chem>                                                           | 2P7Z_A         |
| <chem>c1ccccc1C(C)(C)c2ccc(O)cc2</chem>                                                                                     | 2ZAS_A         |
| <chem>c1cc(O)ccc1C2(CCCC2)c3ccc(O)cc3</chem>                                                                                | 2ZKC_A         |
| <chem>OCC(=O)[C@@]1(O)[C@H](C)[C@H]([C@@]12C)[C@H]3[C@](F)([C@H](C2)O)[C@]4(C)C(CC3)=CC(=O)C=C4</chem>                      | 1M2Z_A         |
| <chem>CC#C[C@]1(O)CC[C@H]([C@@]12C)[C@H]3C(=C4C(CC3)=CC(=O)CC4)[C@H](C2)c5ccc(cc5)N(C)C</chem>                              | 1NHZ_A         |
| <chem>OCC(=O)[C@@]1(O)[C@H](C)[C@H]([C@@]12C)[C@H]3[C@](F)([C@H](C2)O)[C@]4(C)C(CC3)=CC(=O)C=C4</chem>                      | 1P93_A         |
| <chem>OCC(=O)[C@@]1(O)[C@H](C)[C@H]([C@@]12C)[C@H]3[C@H]([C@H](C2)O)[C@]4(C)C(C(C)=C3)=Cc5c(C4)cn5C6=CCCC=C6</chem>         | 3BQD_A         |
| <chem>O1CCCC1C(=O)O[C@]2(C(=O)SCF)[C@H](C)C[C@H]([C@@]23C)[C@H]4[C@](F)([C@H](C3)O)[C@]5(C)C([C@@]4(F)C4)=CC(=O)C=C5</chem> | 3CLD_A         |
| <chem>Clc1cccc(Cl)c1C(=O)N(CC)C[C@@]1(C(F)(F)F)O)CNC(=O)c2c(N)n(nc2)-c3ccc(F)cc3</chem>                                     | 3E7C_A         |
| <chem>OCC(=O)[C@@]1(O)[C@H](C)[C@H]([C@@]12C)[C@H]3[C@](F)([C@H](C2)O)[C@]4(C)C(CC3)=CC(=O)C=C4</chem>                      | 3GN8_A         |
| <chem>CC#C[C@]1(O)CC[C@H]([C@@]12C)[C@H]3C(=C4C(CC3)=CC(=O)CC4)[C@H](C2)c5ccc(cc5)N(C)C</chem>                              | 3H52_A         |
| <chem>c1c(F)ccc(OC)c1C(C)(C)C[C@@]1(C(F)(F)F)O)CNC2cc(C)cc(c23)n(nc3)-c(ccc4)cc4C(=O)N5CCCC[C@@]1H5C(=O)N</chem>            | 3K23_B         |

| Cognate Ligand (SMILE)                                                                                             | PDB code_Chain |
|--------------------------------------------------------------------------------------------------------------------|----------------|
| <chem>OCC(=O)[C@H]1CC[C@H]([C@@]12C)[C@H]3[C@H](CC2)[C@]4(C)C(CC3)=CC(=O)CC4</chem>                                | 1Y9R_A         |
| <chem>CC(=O)[C@H]1CC[C@H]([C@@]12C)[C@H]3[C@H](CC2)[C@]4(C)C(CC3)=CC(=O)CC4</chem>                                 | 1YA3_A         |
| <chem>OCC(=O)[C@H]1CC[C@H]([C@@]12C)[C@H]3[C@H]([C@H](C2)O)[C@]4(C)C(CC3)=CC(=O)CC4</chem>                         | 2A3I_A         |
| <chem>OCC(=O)[C@H]1CC[C@H]([C@@]12C=O)[C@H]3[C@H]([C@H](C2)O)[C@]4(C)C(CC3)=CC(=O)CC4</chem>                       | 2AA2_A         |
| <chem>CC(=O)[C@H]1CC[C@H]([C@@]12C)[C@H]3[C@H](CC2)[C@]4(C)C(CC3)=CC(=O)CC4</chem>                                 | 2AA5_A         |
| <chem>CC(=O)[C@H]1CC[C@H]([C@@]12C)[C@H]3[C@H](CC2)[C@]4(C)C(CC3)=CC(=O)CC4</chem>                                 | 2AA6_A         |
| <chem>OCC(=O)[C@H]1CC[C@H]([C@@]12C)[C@H]3[C@H](CC2)[C@]4(C)C(CC3)=CC(=O)CC4</chem>                                | 2AA7_A         |
| <chem>O=C(C(O)[C@@]1(O)CC[C@H]([C@@]12C)[C@H]3[C@H](C(=O)C2)[C@]4(C)C(CC3)=CC(=O)C=C4</chem>                       | 2AAX_A         |
| <chem>CC(=O)S[C@@]H1CC(=CC(=O)CC2)[C@@]2(C)[C@@]H(CC3)[C@@]H1[C@H](CC4)[C@@]3(C)[C@]45CCC(=O)O5</chem>             | 2AB2_A         |
| <chem>OCC(=O)[C@H]1CC[C@H]([C@@]12C)[C@H]3[C@H](CC2)[C@]4(C)C(CC3)CC(=O)CC4</chem>                                 | 2ABI_A         |
| <chem>CC(=O)S[C@@]H1CC(=CC(=O)CC2)[C@@]2(C)[C@@]H(CC3)[C@@]H1[C@H](CC4)[C@@]3(C)[C@]45CCC(=O)O5</chem>             | 2OAX_A         |
| <chem>CC(=O)[C@H]1CC[C@H]([C@@]12C)[C@H]3[C@H](CC2)[C@]4(C)C(CC3)=CC(=O)CC4</chem>                                 | 1A28_A         |
| <chem>C[C@]1(O)CC[C@H]([C@@]12C)[C@H]3C(C=C2)=C4C(CC3)=CC(=O)CC4</chem>                                            | 1E3K_A         |
| <chem>C#C[C@]1(O)CC[C@H]([C@@]12C)[C@H]3[C@H](CC2)[C@]4(C)C(CC3)=CC(=O)CC4</chem>                                  | 1SQN_A         |
| <chem>o1cccc1C(=O)[C@]2(C(=O)CC)[C@H](C)C[C@H]([C@@]23C)[C@H]4[C@](Cl)([C@H](C3)O)[C@]5(C)C(CC4)=CC(=O)C=C5</chem> | 1SR7_A         |
| <chem>N#Cc1ccc(n1C)-c(c2)ccc(c23)NC(=S)OC3(C)C</chem>                                                              | 1ZUC_A         |
| <chem>CC#C[C@]1(O)CC[C@H]([C@@]12C)[C@H]3C(=C4C(CC3)=CC(=O)CC4)[C@H](C2)c5ccc(cc5)N(C)C</chem>                     | 2W8Y_A         |
| <chem>CS(=O)(=O)N(C1)CC[C@]H1N(c(cc2)cc(Cl)c2C#N)Cc3c(C)cccc3</chem>                                               | 3KBA_A         |
| <chem>C[C@]1(O)CC[C@H]([C@@]12C)[C@H]3C(C=C2)=C4C(CC3)=CC(=O)CC4</chem>                                            | 1E3G_A         |
| <chem>OCC(=O)[C@]1(O)CC[C@H]([C@@]12C)[C@H]3[C@]F([C@H](C2)O)[C@]4(C)C(CC3)=CC(=O)CC4</chem>                       | 1GS4_A         |
| <chem>O[C@H]1CC[C@H]([C@@]12C)[C@H]3[C@H](CC2)[C@]4(C)[C@@]H(CC3)CC(=O)CC4</chem>                                  | 1T5Z_A         |
| <chem>O[C@H]1CC[C@H]([C@@]12C)[C@H]3[C@H](CC2)[C@]4(C)[C@@]H(CC3)CC(=O)CC4</chem>                                  | 1T63_A         |
| <chem>O[C@H]1CC[C@H]([C@@]12C)[C@H]3[C@H](CC2)[C@]4(C)[C@@]H(CC3)CC(=O)CC4</chem>                                  | 1T65_A         |
| <chem>O[C@H]1CC[C@H]([C@@]12C)[C@H]3[C@H](CC2)[C@]4(C)[C@@]H(CC3)CC(=O)CC4</chem>                                  | 1XJ7_A         |
| <chem>C[C@]1(O)CC[C@H]([C@@]12C)[C@H]3C(C=C2)=C4C(CC3)=CC(=O)CC4</chem>                                            | 1XOW_A         |
| <chem>C[C@]1(O)CC[C@H]([C@@]12C)[C@H]3C(C=C2)=C4C(CC3)=CC(=O)CC4</chem>                                            | 1XQ3_A         |
| <chem>N#Cc1c(C(F)(F)F)cc(cc1)NC(=O)[C@@](C)(O)CS(=O)(=O)c(cc2)ccc2F</chem>                                         | 1Z95_A         |
| <chem>O[C@H]1CC[C@H]([C@@]12C)[C@H]3[C@H](CC2)[C@]4(C)C(CC3)=CC(=O)CC4</chem>                                      | 2AM9_A         |
| <chem>O[C@H]1CC[C@H]([C@@]12C)[C@H]3[C@H](CC2)[C@]4(C)[C@@]H(CC3)CC(=O)CC4</chem>                                  | 2AMA_A         |
| <chem>CC[C@]1(O)CC[C@H]([C@@]12CC)[C@H]3C(C=C2)=C4C(CC3)=CC(=O)CC4</chem>                                          | 2AMB_A         |
| <chem>C[C@]1(O)CC[C@H]([C@@]12C)[C@H]3C(C=C2)=C4C(CC3)=CC(=O)CC4</chem>                                            | 2A06_A         |
| <chem>CC(C)(O)C(=O)Nc(c1)ccc([N+][O-])=O)c1C(F)(F)F</chem>                                                         | 2AX6_A         |
| <chem>FC(F)(F)c1c([N+][O-])=O)ccc(c1)NC(=O)[C@@](C)(O)COc2ccc(F)cc2</chem>                                         | 2AX7_A         |
| <chem>FC(F)(F)c1c([N+][O-])=O)ccc(c1)NC(=O)[C@@](C)(O)COc2ccc(F)cc2</chem>                                         | 2AX8_A         |
| <chem>BrC[C@](C)(O)C(=O)Nc(c1)ccc([N+][O-])=O)c1C(F)(F)F</chem>                                                    | 2AX9_A         |
| <chem>FC(F)(F)c1c([N+][O-])=O)ccc(c1)NC(=O)[C@@](C)(O)COc2ccc(F)cc2</chem>                                         | 2AXA_A         |
| <chem>FC(F)(F)CN(CC(F)(F)F)c(c1)ccc(c12)[nH]c(=O)cc2C(F)(F)F</chem>                                                | 2HVC_A         |
| <chem>CC(=O)O[C@]1(C(=O)C)CC[C@H]([C@@]12C)[C@H]3[C@H](CC2)[C@]4(C)[C@@]H5[C@@]H(C5)C(=O)CC4=C(Cl)C3</chem>        | 2OZ7_A         |
| <chem>O[C@H]1CC[C@H]([C@@]12C)[C@H]3[C@H](CC2)[C@]4(C)[C@@]H(CC3)CC(=O)CC4</chem>                                  | 2PIO_A         |
| <chem>O[C@H]1CC[C@H]([C@@]12C)[C@H]3[C@H](CC2)[C@]4(C)[C@@]H(CC3)CC(=O)CC4</chem>                                  | 2PIP_A         |



| Cognate Ligand (SMILE)                                                                              | PDB code_Chain |
|-----------------------------------------------------------------------------------------------------|----------------|
| <chem>O[C@H]1CC[C@H]([C@@]12C)[C@H]3[C@H](CC2)[C@]4(C)[C@@H](CC3)CC(=O)CC4</chem>                   | 2PIQ_A         |
| <chem>O[C@H]1CC[C@H]([C@@]12C)[C@H]3[C@H](CC2)[C@]4(C)[C@@H](CC3)CC(=O)CC4</chem>                   | 2PIR_A         |
| <chem>O[C@H]1CC[C@H]([C@@]12C)[C@H]3[C@H](CC2)[C@]4(C)[C@@H](CC3)CC(=O)CC4</chem>                   | 2PIT_A         |
| <chem>O[C@H]1CC[C@H]([C@@]12C)[C@H]3[C@H](CC2)[C@]4(C)[C@@H](CC3)CC(=O)CC4</chem>                   | 2PIU_A         |
| <chem>O[C@H]1CC[C@H]([C@@]12C)[C@H]3[C@H](CC2)[C@]4(C)[C@@H](CC3)CC(=O)CC4</chem>                   | 2PIV_A         |
| <chem>O[C@H]1CC[C@H]([C@@]12C)[C@H]3[C@H](CC2)[C@]4(C)[C@@H](CC3)CC(=O)CC4</chem>                   | 2PIW_A         |
| <chem>O[C@H]1CC[C@H]([C@@]12C)[C@H]3[C@H](CC2)[C@]4(C)[C@@H](CC3)CC(=O)CC4</chem>                   | 2PIX_A         |
| <chem>O[C@H]1CC[C@H]([C@@]12C)[C@H]3[C@H](CC2)[C@]4(C)[C@@H](CC3)CC(=O)CC4</chem>                   | 2PKL_A         |
| <chem>c1c(F)cc(F)cc1COCC[C@]23[C@@H](CC[C@@H]2O)[C@H]4[C@H](CC3)[C@]5(C)[C@@H](CC4)CC(=O)CC5</chem> | 2PNU_A         |
| <chem>O[C@H]1CC[C@H]([C@@]12C)[C@H]3[C@H](CC2)[C@]4(C)C(CC3)=CC(=O)CC4</chem>                       | 2Q7I_A         |
| <chem>O[C@H]1CC[C@H]([C@@]12C)[C@H]3[C@H](CC2)[C@]4(C)C(CC3)=CC(=O)CC4</chem>                       | 2Q7J_A         |
| <chem>O[C@H]1CC[C@H]([C@@]12C)[C@H]3[C@H](CC2)[C@]4(C)C(CC3)=CC(=O)CC4</chem>                       | 2Q7K_A         |
| <chem>O[C@H]1CC[C@H]([C@@]12C)[C@H]3[C@H](CC2)[C@]4(C)C(CC3)=CC(=O)CC4</chem>                       | 2Q7L_A         |
| <chem>O[C@H]1CC[C@H]([C@@]12C)[C@H]3[C@H](CC2)[C@]4(C)[C@@H](CC3)CC(=O)CC4</chem>                   | 2Z4J_A         |
| <chem>N#Cc1c(C(F)(F)F)cc(cc1)NC(=O)[C@@](C)(O)COc(c2)ccc(Cl)c2F</chem>                              | 3B5R_A         |
| <chem>N#Cc1c(l)cc(cc1)NC(=O)[C@@](C)(O)COc(cc2)ccc2C#N</chem>                                       | 3B65_A         |
| <chem>N#Cc1c(C(F)(F)F)cc(cc1)NC(=O)[C@@](C)(O)COc(cc2)ccc2[N+]([O-])=O</chem>                       | 3B66_A         |
| <chem>FC(F)(F)c1c([N+]([O-])=O)ccc(c1)NC(=O)[C@@](C)(O)COc2c(F)c(F)c(F)c(F)c2F</chem>               | 3B67_A         |
| <chem>FC(F)(F)c1c([N+]([O-])=O)ccc(c1)NC(=O)[C@@](C)(O)COc(cc2)ccc2NC(=O)C</chem>                   | 3B68_A         |

| PDB code_Chain | Ligand Profile | volume   | donorHB | accptHB | QPlogPo/w | MW      | SASA     | FOSA    | FISA    | PISA    | WPSA    | PSA     |
|----------------|----------------|----------|---------|---------|-----------|---------|----------|---------|---------|---------|---------|---------|
| 1NAV_A         | Agonist        | 1047.201 | 2       | 3.25    | 4.361     | 355.217 | 594.987  | 195.012 | 148.283 | 142.016 | 109.676 | 79.236  |
| 1BSX_A         | Agonist        | 1051.276 | 4       | 4.25    | 1.299     | 650.978 | 596.642  | 48.339  | 190.36  | 143.694 | 214.249 | 103.009 |
| 1N46_A         | Agonist        | 1144.652 | 2       | 4.75    | 3.324     | 367.404 | 620.6    | 274.317 | 174.444 | 171.839 | 0       | 112.657 |
| 1NAX_A         | Agonist        | 1042.086 | 2       | 3.25    | 4.325     | 355.217 | 590.911  | 190.563 | 148.263 | 144.644 | 107.441 | 79.235  |
| 1NQ0_A         | Agonist        | 973.989  | 2       | 3.25    | 4.305     | 621.936 | 562.513  | 41.193  | 150.421 | 156.416 | 214.483 | 80.765  |
| 1NQ1_A         | Agonist        | 973.019  | 2       | 3.25    | 4.303     | 621.936 | 563.601  | 43.179  | 149.685 | 156.378 | 214.359 | 80.272  |
| 1NQ2_A         | Agonist        | 973.754  | 2       | 3.25    | 4.306     | 621.936 | 564.184  | 43.26   | 149.895 | 156.717 | 214.312 | 80.24   |
| 1NUO_A         | Agonist        | 974.025  | 2       | 3.25    | 4.31      | 621.936 | 565.214  | 43.179  | 149.685 | 157.991 | 214.359 | 80.272  |
| 1Q4X_A         | Agonist        | 1246.063 | 2       | 3.5     | 5.256     | 376.451 | 696.794  | 226.738 | 153.898 | 316.158 | 0       | 80.256  |
| 1R6G_A         | Agonist        | 1366.795 | 3       | 6.15    | 4.568     | 551.231 | 761.196  | 122.979 | 177.121 | 341.689 | 119.407 | 107.944 |
| 1XZX_X         | Agonist        | 1051.266 | 4       | 4.25    | 1.304     | 650.978 | 597.407  | 48.346  | 189.76  | 145.089 | 214.212 | 103.013 |
| 1Y0X_X         | Agonist        | 1111.483 | 4       | 4.25    | 1.97      | 776.874 | 628.604  | 48.351  | 182.652 | 103.795 | 293.807 | 101.475 |
| 2J4A_A         | Antagonist     | 1113.859 | 2       | 3.25    | 4.857     | 458.146 | 631.08   | 222.301 | 142.108 | 149.485 | 117.186 | 76.96   |
| 2PIN_A         | Agonist        | 973.988  | 2       | 3.25    | 4.305     | 621.936 | 562.513  | 41.193  | 150.421 | 156.416 | 214.483 | 80.765  |
| 3D57_A         | Agonist        | 974.743  | 2       | 3.25    | 4.302     | 621.936 | 565.293  | 41.251  | 151.547 | 158.176 | 214.32  | 80.76   |
| 3GWS_X         | Agonist        | 1051.275 | 4       | 4.25    | 1.299     | 650.978 | 596.64   | 48.338  | 190.359 | 143.693 | 214.25  | 103.009 |
| 3HZF_A         | Agonist        | 1119.302 | 2       | 3.5     | 4.282     | 328.407 | 635.496  | 342.871 | 150.113 | 142.512 | 0       | 78.469  |
| 3IMY_A         | Agonist        | 1119.274 | 2       | 3.5     | 4.282     | 328.407 | 635.458  | 342.843 | 150.113 | 142.502 | 0       | 78.469  |
| 1DKF_B         | Antagonist     | 1424.995 | 2       | 5.5     | 5.55      | 450.536 | 786.72   | 195.594 | 174.221 | 416.905 | 0       | 97.986  |
| 1XAP_A         | Agonist        | 1206.094 | 1       | 2       | 6.022     | 348.484 | 671.625  | 374.072 | 106.807 | 190.746 | 0       | 50.362  |
| 1EXA_A         | Agonist        | 1238.988 | 3       | 6.2     | 3.611     | 399.461 | 679.993  | 308.918 | 190.205 | 165.485 | 15.385  | 104.67  |
| 1EXX_A         | Agonist        | 1263.249 | 3       | 6.2     | 3.855     | 399.461 | 704.12   | 323.91  | 184.924 | 158.811 | 36.475  | 104.718 |
| 1FCX_A         | Agonist        | 1267.988 | 2       | 3.7     | 5.252     | 388.505 | 691.794  | 319.201 | 148.403 | 224.19  | 0       | 70.748  |
| 1FCY_A         | Agonist        | 1259.377 | 1       | 4       | 5.282     | 386.49  | 698.443  | 309.232 | 149.201 | 240.011 | 0       | 76.931  |
| 1FCZ_A         | Agonist        | 1228.352 | 1       | 4       | 5.037     | 362.468 | 691.696  | 324.793 | 151.531 | 215.372 | 0       | 77.381  |
| 1FD0_A         | Agonist        | 1295.473 | 2       | 4.7     | 4.848     | 401.504 | 716.296  | 308.801 | 174.815 | 232.68  | 0       | 85.84   |
| 2LBD_A         | Agonist        | 1141.819 | 1       | 2       | 5.472     | 300.44  | 649.007  | 487.027 | 103.845 | 58.135  | 0       | 49.649  |
| 3LBD_A         | Agonist        | 1140.578 | 1       | 2       | 5.466     | 300.44  | 647.466  | 483.938 | 103.826 | 59.702  | 0       | 49.642  |
| 4LBD_A         | Agonist        | 1263.255 | 3       | 6.2     | 3.855     | 399.461 | 704.127  | 323.909 | 184.92  | 158.818 | 36.48   | 104.718 |
| 1I7G_A         | Agonist        | 1314.856 | 1       | 8.95    | 3.306     | 408.465 | 759.095  | 321.847 | 180.603 | 255.912 | 0.733   | 110.952 |
| 1K7L_A         | Agonist        | 1666.412 | 1       | 7.95    | 6.597     | 512.604 | 918.575  | 271.143 | 130.514 | 516.918 | 0       | 111.51  |
| 1KKQ_A         | Antagonist     | 1888.659 | 1       | 7.25    | 7.806     | 619.682 | 1010.805 | 329.324 | 96.268  | 468.418 | 116.796 | 97.917  |
| 2NPA_A         | Agonist        | 1502.263 | 1       | 7.45    | 5.607     | 436.507 | 865.8    | 393.237 | 125.003 | 347.56  | 0       | 99.354  |
| 2P54_A         | Agonist        | 1378.032 | 2       | 6.75    | 5.368     | 478.485 | 768.975  | 233.562 | 137.647 | 250.146 | 147.621 | 98.269  |
| 2REW_A         | Agonist        | 1619.152 | 1       | 7.5     | 6.488     | 512.561 | 906.436  | 298.471 | 125.191 | 482.774 | 0       | 111.274 |
| 2ZNN_A         | Agonist        | 1682.338 | 2       | 5.25    | 7.312     | 503.68  | 911.87   | 618.035 | 126.435 | 167.4   | 0       | 90.213  |
| 3ET1_A         | Agonist        | 1152.33  | 1       | 8       | 2.722     | 389.422 | 647.178  | 247.109 | 176.971 | 221.283 | 1.814   | 105.316 |
| 3G8I_A         | Agonist        | 1348.897 | 1       | 7.65    | 4.853     | 439.525 | 741.934  | 270.148 | 103.165 | 333.766 | 34.855  | 83.591  |
| 1GWX_A         | Agonist        | 1652.66  | 2       | 4.75    | 7.696     | 581.898 | 889.709  | 239.667 | 110.419 | 373.335 | 166.289 | 84.679  |
| 1Y0S_A         | Agonist        | 1642.798 | 2       | 4.75    | 7.109     | 490.589 | 914.924  | 477.225 | 114.459 | 244.78  | 78.46   | 85.054  |

| PDB code_Chain | Ligand Profile  | volume   | donorHB | accptHB | QPlogPo/w | MW      | SASA     | FOSA    | FISA    | PISA    | WPSA    | PSA     |
|----------------|-----------------|----------|---------|---------|-----------|---------|----------|---------|---------|---------|---------|---------|
| 2AWH_A         | Agonist         | 1233.447 | 1       | 2       | 5.967     | 282.465 | 732.521  | 604.517 | 109.68  | 18.325  | 0       | 51.746  |
| 2B50_A         | Agonist         | 1233.438 | 1       | 2       | 5.967     | 282.465 | 732.513  | 604.509 | 109.68  | 18.324  | 0       | 51.746  |
| 2BAW_A         | Agonist         | 1233.452 | 1       | 2       | 5.967     | 282.465 | 732.535  | 604.531 | 109.68  | 18.323  | 0       | 51.745  |
| 2J14_A         | Agonist         | 1459.378 | 2       | 6.75    | 5.892     | 511.36  | 801.552  | 95.756  | 157.57  | 409.372 | 138.854 | 114.735 |
| 2ZNP_A         | Agonist         | 1424.784 | 2       | 5.25    | 6.185     | 469.475 | 779.215  | 346.796 | 135.899 | 142.904 | 153.616 | 90.329  |
| 2ZNQ_A         | Agonist         | 1262.944 | 2       | 5.25    | 5.158     | 427.395 | 712.594  | 247.225 | 141.928 | 169.935 | 153.506 | 91.509  |
| 3D5F_A         | Agonist         | 1346.563 | 1       | 6       | 4.657     | 402.443 | 778.053  | 359.849 | 191.425 | 226.779 | 0       | 119.828 |
| 3DY6_A         | Partial agonist | 1186.704 | 1       | 8       | 3.012     | 436.481 | 596.915  | 98.497  | 188.582 | 308.595 | 1.24    | 119.564 |
| 3ET2_A         | Agonist         | 1152.334 | 1       | 8       | 2.722     | 389.422 | 647.183  | 247.111 | 176.968 | 221.29  | 1.814   | 105.315 |
| 3GZ9_A         | Agonist         | 1502.314 | 1.5     | 4.25    | 7.497     | 516.531 | 810.881  | 272.785 | 111.532 | 278.118 | 148.445 | 71.349  |
| 1FM6_D         | Agonist         | 1124.132 | 2       | 4.75    | 3.774     | 359.442 | 644.877  | 235.552 | 123.159 | 243.471 | 42.696  | 92.512  |
| 1FM9_D         | Agonist         | 1736.54  | 1       | 6.75    | 7.753     | 546.621 | 959.796  | 171.934 | 127.824 | 660.038 | 0       | 107.947 |
| 1I7L_A         | Agonist         | 1314.818 | 1       | 8.95    | 3.306     | 408.465 | 759.06   | 321.821 | 180.614 | 255.893 | 0.733   | 110.957 |
| 1KNU_A         | Agonist         | 1306.517 | 1       | 4.45    | 5.969     | 403.477 | 725.251  | 219.504 | 94.314  | 411.433 | 0       | 64.755  |
| 1NYX_A         | Agonist         | 1318.876 | 1       | 5.45    | 5.689     | 419.476 | 736.066  | 190.883 | 91.3    | 453.883 | 0       | 74.757  |
| 1RDT_D         | Agonist         | 1738.097 | 1       | 6.75    | 7.785     | 546.621 | 961.574  | 175.699 | 124.814 | 661.06  | 0       | 108.384 |
| 1WM0_X         | Agonist         | 1108.199 | 1       | 6       | 4.051     | 404.209 | 634.878  | 0       | 154.459 | 359.611 | 120.808 | 108.806 |
| 1ZEO_A         | Agonist         | 1351.911 | 1       | 5.75    | 5.123     | 425.524 | 717.834  | 463.916 | 131.014 | 122.903 | 0       | 95.957  |
| 1ZGY_A         | Agonist         | 1124.13  | 2       | 4.75    | 3.774     | 359.442 | 644.875  | 235.551 | 123.159 | 243.469 | 42.696  | 92.512  |
| 2ATH_A         | Agonist         | 1413.879 | 1       | 5       | 6.32      | 476.451 | 800.17   | 277.18  | 145.364 | 261.614 | 116.012 | 95.333  |
| 2F4B_A         | Agonist         | 1685.416 | 1       | 5.5     | 7.693     | 521.612 | 930.065  | 274.899 | 143.955 | 511.21  | 0       | 93.821  |
| 2FVJ_A         | Partial agonist | 1736.205 | 0       | 6.75    | 7.138     | 542.674 | 937.707  | 615.667 | 5.859   | 316.182 | 0       | 50.058  |
| 2G0G_A         | Partial agonist | 1123.758 | 1       | 5.5     | 4.437     | 417.447 | 607.881  | 0       | 85.249  | 384.345 | 138.287 | 61.275  |
| 2G0H_A         | Partial agonist | 1239.837 | 1       | 5.5     | 5.561     | 535.454 | 633.801  | 1.429   | 83.6    | 281.618 | 267.154 | 61.644  |
| 2GTK_A         | Agonist         | 1365.991 | 1       | 5.7     | 5.897     | 438.91  | 766.113  | 281.364 | 98.53   | 329.638 | 56.581  | 77.142  |
| 2HWQ_A         | Agonist         | 1699.472 | 1       | 5.5     | 7.664     | 521.612 | 942.45   | 261.049 | 162.166 | 519.235 | 0       | 94.977  |
| 2HWR_A         | Agonist         | 1774.771 | 1       | 5.5     | 8.28      | 549.665 | 962.829  | 331.501 | 138.824 | 492.504 | 0       | 89.554  |
| 2I4J_A         | Agonist         | 1586.21  | 1       | 5.25    | 7.259     | 452.592 | 889.989  | 493.862 | 95.065  | 301.062 | 0       | 72.878  |
| 2I4P_A         | Partial agonist | 1560.393 | 1       | 5.25    | 7.149     | 452.592 | 867.434  | 481.228 | 87.229  | 298.977 | 0       | 71.808  |
| 2I4Z_A         | Partial agonist | 1570.237 | 1       | 5.25    | 7.207     | 452.592 | 877.567  | 489.085 | 88.004  | 300.479 | 0       | 71.95   |
| 2OM9_A         | Partial agonist | 1370.293 | 2       | 3.5     | 5.843     | 400.557 | 755.486  | 542.692 | 141.229 | 71.565  | 0       | 76.328  |
| 2P4Y_A         | Partial agonist | 1498.259 | 1       | 5       | 6.87      | 574.94  | 784.428  | 230.585 | 153.497 | 275.423 | 124.923 | 101.581 |
| 2POB_A         | Antagonist      | 1880.832 | 1       | 7.25    | 7.607     | 573.69  | 1034.027 | 292.135 | 84.326  | 657.565 | 0       | 100.893 |
| 2PRG_A         | Agonist         | 1124.139 | 2       | 4.75    | 3.774     | 359.442 | 644.883  | 235.556 | 123.16  | 243.471 | 42.696  | 92.512  |
| 2Q59_A         | Agonist         | 1465.015 | 1       | 6.5     | 6.416     | 527.496 | 784.264  | 253.298 | 98.868  | 309.89  | 122.209 | 96.673  |
| 2Q6R_A         | Partial agonist | 1220.63  | 1       | 2.75    | 6.602     | 423.913 | 662.985  | 122.793 | 74.827  | 368.601 | 96.765  | 55.232  |
| 2Q6S_B         | Partial agonist | 1105.108 | 1       | 6       | 4.126     | 404.209 | 634.743  | 0       | 141.768 | 375.148 | 117.827 | 108.642 |
| 2VST_A         | Agonist         | 1233.278 | 2       | 3.7     | 4.815     | 296.449 | 733.38   | 545.756 | 145.412 | 42.212  | 0       | 71.612  |
| 2VV0_A         | Agonist         | 1259.27  | 1       | 2       | 6.225     | 328.494 | 658.77   | 466.394 | 109.598 | 82.778  | 0       | 51.758  |
| 2VV1_A         | Agonist         | 1247.056 | 2       | 3.7     | 5.268     | 344.493 | 649.667  | 425.518 | 110.8   | 113.35  | 0       | 69.498  |

| PDB code_Chain | Ligand Profile  | volume   | donorHB | accptHB | QPlogPo/w | MW      | SASA     | FOSA    | FISA    | PISA    | WPSA    | PSA     |
|----------------|-----------------|----------|---------|---------|-----------|---------|----------|---------|---------|---------|---------|---------|
| 2VV2_A         | Agonist         | 1190.941 | 2       | 3.7     | 4.648     | 318.455 | 642.18   | 412.051 | 143.605 | 86.525  | 0       | 72.969  |
| 2VV3_A         | Agonist         | 1218.063 | 1       | 4       | 5.096     | 344.493 | 627.812  | 442.917 | 112.751 | 72.144  | 0       | 75.483  |
| 2VV4_A         | Agonist         | 1178.482 | 1       | 4.7     | 4.233     | 310.433 | 673.228  | 487.828 | 148.822 | 36.578  | 0       | 99.133  |
| 2ZK1_A         | Agonist         | 1194.186 | 1       | 4       | 4.661     | 316.439 | 677.794  | 407.352 | 157.072 | 113.37  | 0       | 79.535  |
| 2ZK2_A         | Agonist         | 1193.985 | 1       | 4       | 4.66      | 316.439 | 677.535  | 407.095 | 157.071 | 113.37  | 0       | 79.534  |
| 2ZK3_A         | Agonist         | 1190.96  | 1       | 4       | 4.817     | 318.455 | 654.573  | 462.878 | 125.027 | 66.668  | 0       | 76.681  |
| 2ZK4_A         | Agonist         | 1224.577 | 1       | 4       | 5.106     | 318.455 | 680.769  | 490.75  | 114.881 | 75.138  | 0       | 78.844  |
| 2ZK5_A         | Agonist         | 980.013  | 1       | 4.5     | 3.224     | 301.298 | 565.931  | 173.068 | 159.938 | 232.924 | 0       | 98.022  |
| 2ZNO_A         | Agonist         | 1478.588 | 2       | 4.5     | 6.326     | 445.6   | 807.131  | 457.722 | 135.752 | 213.657 | 0       | 83.149  |
| 2ZVT_A         | Agonist         | 1188.98  | 1       | 4       | 4.575     | 316.439 | 678.81   | 407.719 | 163.613 | 107.478 | 0       | 81.317  |
| 3B3K_A         | Agonist         | 1023.114 | 1       | 2.75    | 4.843     | 318.371 | 559.146  | 31.61   | 103.752 | 423.784 | 0       | 57.542  |
| 3BC5_A         | Agonist         | 1491.815 | 1       | 6.75    | 5.983     | 494.549 | 764.208  | 205.348 | 125.97  | 432.889 | 0       | 106.776 |
| 3CDP_A         | Partial agonist | 855.878  | 1       | 2.75    | 4.108     | 276.719 | 490.57   | 24.134  | 92.75   | 302.011 | 71.675  | 54.423  |
| 3CDS_A         | Agonist         | 929.657  | 1       | 2.75    | 4.175     | 270.327 | 528.344  | 154.471 | 92.762  | 281.111 | 0       | 54.426  |
| 3CS8_A         | Agonist         | 1124.129 | 2       | 4.75    | 3.774     | 359.442 | 644.873  | 235.551 | 123.156 | 243.47  | 42.696  | 92.511  |
| 3CWD_A         | Agonist         | 1192.883 | 1       | 4       | 4.267     | 325.447 | 657.592  | 429.498 | 199.652 | 28.442  | 0       | 95.988  |
| 3DZU_D         | Agonist         | 1108.238 | 1       | 6       | 4.05      | 404.209 | 634.75   | 0       | 154.557 | 359.391 | 120.801 | 108.825 |
| 3DZY_D         | Agonist         | 1124.132 | 2       | 4.75    | 3.774     | 359.442 | 644.875  | 235.557 | 123.154 | 243.468 | 42.696  | 92.509  |
| 3E00_D         | Antagonist      | 836.242  | 1       | 3.5     | 2.772     | 276.679 | 505.015  | 0       | 135.151 | 310.002 | 59.862  | 78.657  |
| 3ET3_A         | Partial agonist | 1151.337 | 1       | 8       | 2.716     | 389.422 | 647.219  | 247.125 | 176.946 | 221.334 | 1.815   | 105.309 |
| 3FEI_A         | Agonist         | 1319.72  | 1       | 5.95    | 5.633     | 431.933 | 734.694  | 257.348 | 99.936  | 263.972 | 113.439 | 72.026  |
| 3FEJ_A         | Agonist         | 1292.576 | 1       | 5.95    | 5.378     | 431.933 | 691.682  | 227.362 | 106.342 | 256.963 | 101.015 | 74.795  |
| 3FUR_A         | Antagonist      | 1275.294 | 1       | 6       | 5.327     | 514.209 | 692.844  | 0       | 105.327 | 364.266 | 223.251 | 66.681  |
| 3G9E_A         | Agonist         | 1296.641 | 1       | 6.45    | 5.037     | 437.509 | 681.834  | 170.18  | 111.266 | 366.384 | 34.004  | 87.402  |
| 3H0A_D         | Partial agonist | 1719.143 | 1       | 4.25    | 9.003     | 570.622 | 940.148  | 377.406 | 112.157 | 301.518 | 149.067 | 70.748  |
| 3HO0_A         | Agonist         | 1090.224 | 1       | 2.75    | 5.276     | 332.398 | 601.625  | 67.093  | 103.376 | 431.156 | 0       | 57.382  |
| 3HOD_A         | Agonist         | 1561.358 | 1       | 10.75   | 4.195     | 504.539 | 789.894  | 717.773 | 54.332  | 17.712  | 0.076   | 64.858  |
| 3IA6_B         | Agonist         | 1379.565 | 1       | 6.5     | 5.287     | 416.479 | 775.64   | 210.334 | 134.965 | 430.341 | 0       | 98.637  |
| 4PRG_A         | Partial agonist | 2015.621 | 1       | 8.5     | 7.161     | 618.873 | 1031.838 | 530.185 | 139.236 | 337.974 | 24.443  | 96.07   |
| 1N83_A         | Agonist         | 1386.841 | 1       | 1.7     | 7.013     | 386.66  | 728.429  | 651.091 | 48.894  | 28.444  | 0       | 22.273  |
| 1S0X_A         | Agonist         | 1515.277 | 1       | 4       | 6.684     | 466.718 | 805.008  | 625.379 | 148.171 | 29.945  | 1.513   | 72.713  |
| 1P8D_A         | Agonist         | 1362.425 | 1       | 3.7     | 6.01      | 400.643 | 704.072  | 626.734 | 48.893  | 28.445  | 0       | 35.142  |
| 1PQ6_A         | Agonist         | 1548.746 | 1       | 4.75    | 5.918     | 582.061 | 742.77   | 143.098 | 29.871  | 466.591 | 103.211 | 59.207  |
| 1PQ9_A         | Agonist         | 819.065  | 2       | 1       | 4.663     | 341.176 | 485.851  | 44.537  | 41.13   | 98.474  | 301.711 | 29.632  |
| 1PQC_A         | Agonist         | 1114.19  | 1       | 4.5     | 5.088     | 481.332 | 612.074  | 34.239  | 88.446  | 214.07  | 275.319 | 52.674  |
| 1UPV_A         | Agonist         | 1121.106 | 1       | 4.5     | 5.081     | 481.332 | 619.275  | 22.266  | 95.871  | 229.813 | 271.325 | 54.149  |
| 1UPW_A         | Agonist         | 1121.099 | 1       | 4.5     | 5.081     | 481.332 | 619.269  | 22.267  | 95.868  | 229.81  | 271.324 | 54.149  |
| 3KFC_A         | Agonist         | 1249.727 | 0       | 5.5     | 5.108     | 443.44  | 692.678  | 79.504  | 83.606  | 417.318 | 112.25  | 55.391  |
| 1UHL_B         | Agonist         | 1121.098 | 1       | 4.5     | 5.081     | 481.332 | 619.267  | 22.265  | 95.868  | 229.811 | 271.324 | 54.149  |
| 2ACL_B         | Agonist         | 1220.336 | 1       | 4.25    | 5.287     | 384.434 | 677.563  | 129.992 | 64.236  | 483.336 | 0       | 70.549  |

| PDB code_Chain | Ligand Profile | volume   | donorHB | accptHB | QPlogPo/w | MW      | SASA     | FOSA    | FISA    | PISA    | WPSA    | PSA     |
|----------------|----------------|----------|---------|---------|-----------|---------|----------|---------|---------|---------|---------|---------|
| 3FAL_B         | Agonist        | 1371.513 | 1       | 2.5     | 7.761     | 499.88  | 757.053  | 373.83  | 27.312  | 105.801 | 250.111 | 34.077  |
| 3FC6_B         | Agonist        | 1739.456 | 1       | 4.75    | 6.849     | 621.098 | 878.544  | 107.358 | 101.018 | 527.007 | 143.162 | 64.203  |
| 1OSH_A         | Agonist        | 1639.506 | 0       | 6       | 6.963     | 498.664 | 853.569  | 520.009 | 61.453  | 272.108 | 0       | 63.931  |
| 3BEJ_A         | Agonist        | 1292.245 | 2       | 4.75    | 4.668     | 420.547 | 685.48   | 311.445 | 189.47  | 184.565 | 0       | 95.295  |
| 3DCT_A         | Agonist        | 1557.099 | 1       | 4.25    | 7.876     | 542.845 | 859.041  | 169.056 | 145.666 | 382.581 | 161.739 | 82.86   |
| 3FLI_A         | Agonist        | 1323.341 | 0       | 5       | 5.053     | 440.489 | 693.12   | 285.72  | 77.256  | 241.307 | 88.836  | 68.76   |
| 3GD2_A         | Agonist        | 1604.831 | 1       | 8.25    | 6.04      | 604.931 | 828.63   | 199.701 | 184.258 | 297.151 | 147.52  | 100.611 |
| 3L1B_A         | Agonist        | 1758.046 | 0       | 8.45    | 5.98      | 563.668 | 950.028  | 561.702 | 89.137  | 252.092 | 47.097  | 92.47   |
| 3OKH_A         | Agonist        | 1470.428 | 2       | 6       | 5.388     | 494.032 | 766.18   | 367.804 | 125.5   | 201.241 | 71.636  | 93.379  |
| 3OKI_A         | Agonist        | 1418.929 | 1       | 4       | 6.263     | 450.022 | 750.682  | 394.565 | 31.992  | 252.491 | 71.634  | 43.381  |
| 3OLF_A         | Agonist        | 1515.1   | 2       | 6       | 6.573     | 537.992 | 798.8    | 225.16  | 144.307 | 268.96  | 160.373 | 93.422  |
| 3OMK_A         | Agonist        | 1432.336 | 1       | 4       | 7.369     | 493.983 | 756.104  | 225.136 | 37.514  | 333.08  | 160.373 | 43.054  |
| 3OMM_A         | Agonist        | 1491.049 | 2       | 6       | 6.507     | 541.956 | 797.946  | 180.941 | 144.715 | 295.662 | 176.628 | 94.149  |
| 3OOF_A         | Agonist        | 1482.081 | 2       | 6       | 6.4       | 523.966 | 793.042  | 181.004 | 144.987 | 306.689 | 160.362 | 94.447  |
| 3OOK_A         | Agonist        | 1501.326 | 2       | 6       | 6.656     | 559.947 | 797.414  | 176.485 | 145.233 | 268.19  | 207.505 | 94.312  |
| 1DB1_A         | Agonist        | 1462.379 | 3       | 4.15    | 5.514     | 416.643 | 766.42   | 618.12  | 122.441 | 25.859  | 0       | 63.46   |
| 1IE8_A         | Agonist        | 1622.52  | 3       | 5.85    | 5.902     | 460.696 | 862.493  | 723.787 | 112.842 | 25.864  | 0       | 69.244  |
| 1IE9_A         | Agonist        | 1466.167 | 3       | 4.15    | 5.528     | 416.643 | 772.088  | 622.71  | 123.515 | 25.863  | 0       | 63.429  |
| 1S0Z_A         | Agonist        | 1601.786 | 3       | 4.15    | 6.483     | 454.692 | 849.788  | 695.424 | 110.873 | 43.491  | 0       | 60.604  |
| 1S19_A         | Agonist        | 1417.466 | 3       | 5.1     | 4.851     | 412.611 | 746.069  | 586.393 | 126.101 | 33.575  | 0       | 64.04   |
| 1TXI_A         | Agonist        | 1439.696 | 3       | 4.15    | 5.301     | 402.616 | 785.558  | 644.652 | 128.084 | 12.821  | 0       | 64.557  |
| 2HAM_A         | Agonist        | 1637.154 | 3       | 4.15    | 6.746     | 458.723 | 867.442  | 736.489 | 102.577 | 28.376  | 0       | 59.726  |
| 2HAR_A         | Agonist        | 1703.947 | 4       | 7.55    | 5.137     | 490.722 | 908.468  | 710.875 | 168.88  | 28.712  | 0       | 92.887  |
| 2HAS_A         | Agonist        | 1680.657 | 3       | 5.85    | 6.263     | 474.723 | 894.755  | 754.434 | 113.046 | 27.275  | 0       | 69.871  |
| 2HB7_A         | Agonist        | 1660.069 | 4       | 5.85    | 5.599     | 474.723 | 880.115  | 692.647 | 159.09  | 28.379  | 0       | 82.858  |
| 2HB8_A         | Agonist        | 1519.486 | 3       | 4.15    | 5.955     | 430.67  | 801.685  | 666.059 | 109.9   | 25.726  | 0       | 61.095  |
| 3CS4_A         | Agonist        | 1481.019 | 3       | 4.9     | 5.334     | 444.653 | 771.164  | 621.665 | 123.661 | 25.837  | 0       | 69.73   |
| 3CS6_A         | Agonist        | 1484.504 | 3       | 4.9     | 5.402     | 444.653 | 778.436  | 634.318 | 116.751 | 27.366  | 0       | 69.152  |
| 1ILH_A         | Agonist        | 1529.918 | 1       | 10.75   | 4.066     | 504.539 | 754.779  | 694.655 | 46.871  | 12.34   | 0.914   | 67.592  |
| 1M13_A         | Agonist        | 1796.887 | 0       | 5.75    | 8.006     | 536.793 | 885.678  | 810.369 | 37.003  | 38.306  | 0       | 67.85   |
| 1NRL_A         | Agonist        | 1528.841 | 1       | 10.75   | 4.002     | 504.539 | 764.575  | 686.538 | 56.013  | 19.806  | 2.218   | 67.234  |
| 1SKX_A         | Agonist        | 2248.58  | 6       | 20.35   | 2.867     | 822.951 | 1032.045 | 783.951 | 199.452 | 48.642  | 0       | 210.679 |
| 2O9I_A         | Antagonist     | 1114.194 | 1       | 4.5     | 5.088     | 481.332 | 612.081  | 34.239  | 88.446  | 214.075 | 275.322 | 52.674  |
| 2QNV_A         | Agonist        | 1341.181 | 0       | 8       | 3.677     | 400.557 | 676.874  | 582.679 | 71.933  | 22.262  | 0       | 82.124  |
| 3HLV_B         | Agonist        | 1127.485 | 1       | 2.75    | 5.522     | 346.425 | 613.069  | 67.161  | 104.255 | 441.653 | 0       | 57.621  |
| 1XV9_B         | Agonist        | 1051.419 | 0       | 4       | 3.733     | 316.483 | 561.349  | 466.691 | 94.658  | 0       | 0       | 55.693  |
| 1XVP_B         | Agonist        | 1124.775 | 0       | 4.7     | 5.188     | 436.742 | 596.526  | 65.023  | 36.585  | 299.202 | 195.715 | 32.889  |
| 1PZL_A         | Agonist        | 1010.699 | 1       | 2       | 4.517     | 228.374 | 612.125  | 502.446 | 109.68  | 0       | 0       | 51.745  |
| 3FS1_A         | Agonist        | 1010.699 | 1       | 2       | 4.517     | 228.374 | 612.126  | 502.446 | 109.68  | 0       | 0       | 51.745  |
| 1LV2_A         | Agonist        | 1131.925 | 1       | 2       | 5.293     | 256.428 | 678.166  | 568.486 | 109.68  | 0       | 0       | 51.745  |

| PDB code_Chain | Ligand Profile  | volume   | donorHB | accptHB | QPlogPo/w | MW      | SASA    | FOSA    | FISA    | PISA    | WPSA   | PSA    |
|----------------|-----------------|----------|---------|---------|-----------|---------|---------|---------|---------|---------|--------|--------|
| 1FBY_A         | Agonist         | 1140.65  | 1       | 2       | 5.467     | 300.44  | 647.641 | 484.065 | 103.828 | 59.749  | 0      | 49.652 |
| 1FM6_A         | Agonist         | 1139.934 | 1       | 2       | 5.462     | 300.44  | 646.777 | 483.827 | 103.826 | 59.124  | 0      | 49.652 |
| 1FM9_A         | Agonist         | 1139.939 | 1       | 2       | 5.462     | 300.44  | 646.781 | 483.831 | 103.827 | 59.123  | 0      | 49.652 |
| 1G5Y_A         | Agonist         | 1142.689 | 1       | 2       | 5.478     | 300.44  | 648.094 | 486.247 | 103.845 | 58.002  | 0      | 49.649 |
| 1K74_A         | Agonist         | 1140.015 | 1       | 2       | 5.462     | 300.44  | 646.587 | 483.759 | 103.829 | 59      | 0      | 49.652 |
| 1MV9_A         | Agonist         | 1482.331 | 1       | 2       | 7.569     | 338.573 | 871.015 | 745.729 | 109.68  | 15.607  | 0      | 51.746 |
| 1MVC_A         | Agonist         | 1231.19  | 1       | 3.5     | 5.507     | 380.483 | 670.099 | 412.884 | 106.808 | 150.406 | 0      | 62.917 |
| 1MZN_A         | Agonist         | 1231.377 | 1       | 3.5     | 5.508     | 380.483 | 672.565 | 414.79  | 106.808 | 150.966 | 0      | 62.915 |
| 1RDT_A         | Agonist         | 1239.172 | 1       | 2.5     | 6.024     | 374.479 | 692.201 | 337.336 | 114.813 | 240.052 | 0      | 59.791 |
| 1XLS_A         | Agonist         | 1144.194 | 1       | 2       | 5.466     | 302.456 | 643.665 | 500.773 | 103.895 | 38.997  | 0      | 49.642 |
| 1XV9_A         | Agonist         | 1071.308 | 1       | 2       | 4.905     | 242.401 | 645.144 | 535.463 | 109.68  | 0       | 0      | 51.745 |
| 1XVP_A         | Agonist         | 1071.313 | 1       | 2       | 4.905     | 242.401 | 645.147 | 535.467 | 109.68  | 0       | 0      | 51.745 |
| 2ACL_A         | Agonist         | 1140.648 | 1       | 2       | 5.467     | 300.44  | 647.644 | 484.064 | 103.827 | 59.753  | 0      | 49.652 |
| 2P1T_A         | Partial agonist | 1262.042 | 2       | 3.5     | 5.159     | 380.483 | 701.42  | 411.467 | 152.494 | 137.46  | 0      | 78.291 |
| 2P1U_A         | Partial agonist | 1324.255 | 2       | 3.5     | 5.575     | 394.51  | 731.406 | 449.411 | 148.438 | 133.557 | 0      | 77.553 |
| 2P1V_A         | Partial agonist | 1379.251 | 2       | 3.5     | 5.913     | 408.536 | 753.494 | 478.104 | 148.983 | 126.406 | 0      | 76.889 |
| 2ZXZ_A         | Agonist         | 1196.223 | 1       | 3.5     | 5.298     | 366.456 | 657.375 | 387.782 | 106.809 | 162.785 | 0      | 62.906 |
| 2ZY0_A         | Agonist         | 1296.018 | 1       | 3.5     | 5.935     | 398.605 | 711.537 | 438.948 | 106.809 | 165.78  | 0      | 62.925 |
| 3DZU_A         | Agonist         | 1121.15  | 1       | 2       | 5.341     | 302.456 | 618.263 | 459.626 | 103.807 | 54.83   | 0      | 49.643 |
| 3DZY_A         | Agonist         | 1121.152 | 1       | 2       | 5.341     | 302.456 | 618.252 | 459.614 | 103.807 | 54.831  | 0      | 49.643 |
| 3E00_A         | Agonist         | 1121.15  | 1       | 2       | 5.341     | 302.456 | 618.255 | 459.617 | 103.807 | 54.83   | 0      | 49.643 |
| 3FAL_A         | Agonist         | 1140.147 | 1       | 2       | 5.463     | 300.44  | 646.768 | 483.733 | 103.828 | 59.207  | 0      | 49.652 |
| 3FC6_A         | Agonist         | 1139.936 | 1       | 2       | 5.462     | 300.44  | 646.78  | 483.827 | 103.827 | 59.125  | 0      | 49.652 |
| 3H0A_A         | Agonist         | 1195.817 | 1       | 2       | 5.907     | 348.484 | 655.268 | 400.807 | 106.823 | 147.637 | 0      | 50.366 |
| 1H9U_A         | Agonist         | 1219.382 | 1       | 3       | 5.563     | 363.499 | 660.982 | 447.213 | 110.464 | 103.305 | 0      | 59.978 |
| 1UHL_A         | Agonist         | 1063.427 | 1       | 2.75    | 4.615     | 268.395 | 622.004 | 494.768 | 103.733 | 23.503  | 0      | 57.525 |
| 1A52_A         | Agonist         | 910.352  | 2       | 2.45    | 4.004     | 272.386 | 511.15  | 303.648 | 95.839  | 111.663 | 0      | 43.692 |
| 1ERE_A         | Agonist         | 910.353  | 2       | 2.45    | 4.004     | 272.386 | 511.15  | 303.649 | 95.839  | 111.663 | 0      | 43.693 |
| 1ERR_A         | Antagonist      | 1477.819 | 2       | 6.25    | 4.832     | 473.586 | 824.811 | 282.161 | 141.116 | 364.579 | 36.955 | 81.174 |
| 1G50_A         | Agonist         | 910.352  | 2       | 2.45    | 4.004     | 272.386 | 511.15  | 303.648 | 95.839  | 111.663 | 0      | 43.692 |
| 1GWQ_A         | Agonist         | 771.332  | 2       | 1.5     | 2.956     | 242.292 | 467.813 | 0       | 109.441 | 322.364 | 36.008 | 45.104 |
| 1GWR_A         | Agonist         | 910.352  | 2       | 2.45    | 4.004     | 272.386 | 511.15  | 303.648 | 95.839  | 111.663 | 0      | 43.692 |
| 1L2I_A         | Antagonist      | 1063.068 | 2       | 1.5     | 4.53      | 320.43  | 591.904 | 287.748 | 109.437 | 194.719 | 0      | 45.114 |
| 1PCG_A         | Agonist         | 910.352  | 2       | 2.45    | 4.004     | 272.386 | 511.15  | 303.648 | 95.839  | 111.663 | 0      | 43.692 |
| 1QKT_A         | Agonist         | 910.352  | 2       | 2.45    | 4.004     | 272.386 | 511.15  | 303.648 | 95.839  | 111.663 | 0      | 43.692 |
| 1QKU_A         | Agonist         | 910.352  | 2       | 2.45    | 4.004     | 272.386 | 511.15  | 303.648 | 95.839  | 111.663 | 0      | 43.692 |
| 1R5K_A         | Antagonist      | 1208.625 | 1       | 2       | 6.272     | 354.448 | 669.921 | 118.22  | 114.69  | 437.011 | 0      | 51.618 |
| 1SJ0_A         | Partial agonist | 1431.659 | 2       | 5.5     | 5.002     | 463.59  | 789.296 | 307.868 | 110.713 | 345.52  | 25.194 | 65.694 |
| 1UOM_A         | Antagonist      | 1435.102 | 1       | 4.5     | 5.946     | 428.573 | 789.851 | 354.558 | 56.298  | 378.995 | 0      | 37.199 |
| 1X7E_A         | Agonist         | 886.084  | 2       | 3.75    | 2.161     | 267.284 | 525.443 | 101.819 | 177.001 | 246.623 | 0      | 78.6   |



| PDB code_Chain | Ligand Profile  | volume   | donorHB | accptHB | QPlogPo/w | MW      | SASA    | FOSA    | FISA    | PISA    | WPSA   | PSA     |
|----------------|-----------------|----------|---------|---------|-----------|---------|---------|---------|---------|---------|--------|---------|
| 1X7R_A         | Agonist         | 806.688  | 2       | 3.75    | 1.67      | 270.241 | 480.232 | 0       | 187.061 | 293.171 | 0      | 98.585  |
| 1XP1_A         | Antagonist      | 1493.671 | 2       | 5.5     | 5.371     | 477.617 | 818.883 | 334.601 | 113.529 | 345.559 | 25.194 | 66.199  |
| 1XP6_A         | Antagonist      | 1493.292 | 2       | 5.5     | 5.367     | 477.617 | 818.284 | 334.166 | 113.692 | 345.232 | 25.195 | 66.287  |
| 1XP9_A         | Antagonist      | 1429.755 | 2       | 5.5     | 4.976     | 463.59  | 781.807 | 302.254 | 112.585 | 341.772 | 25.196 | 65.462  |
| 1XPC_A         | Agonist         | 1431.757 | 2       | 5.5     | 4.986     | 463.59  | 784.174 | 305.26  | 112.684 | 341.036 | 25.194 | 65.043  |
| 1XQC_A         | Partial agonist | 1427.666 | 1       | 4.75    | 5.756     | 439.599 | 768.968 | 361.334 | 57.366  | 350.268 | 0      | 32.24   |
| 1YIM_A         | Antagonist      | 1423.252 | 2       | 5       | 5.012     | 445.557 | 779.876 | 344.225 | 113.599 | 322.051 | 0      | 66.397  |
| 1YIN_A         | Antagonist      | 1499.046 | 2       | 5       | 5.626     | 477.574 | 818.418 | 369.034 | 107.669 | 313.365 | 28.349 | 63.697  |
| 1ZKY_A         | Agonist         | 936.272  | 2       | 4.15    | 2.81      | 288.386 | 515.135 | 272.574 | 94.122  | 148.44  | 0      | 50.976  |
| 2AYR_A         | Antagonist      | 1589.996 | 1       | 8       | 4.854     | 517.639 | 862.541 | 359.296 | 135.009 | 368.181 | 0.055  | 78.727  |
| 2B1V_A         | Agonist         | 867.183  | 2       | 4.15    | 2.369     | 260.332 | 496.665 | 226.739 | 99.249  | 170.677 | 0      | 51.218  |
| 2B1Z_A         | Agonist         | 923.43   | 2       | 1.5     | 3.825     | 282.382 | 515.875 | 252.191 | 84.675  | 179.009 | 0      | 40.733  |
| 2BJ4_A         | Antagonist      | 1336.517 | 1       | 3.5     | 5.71      | 387.521 | 723.845 | 300.593 | 59.763  | 363.49  | 0      | 36.094  |
| 2FAI_A         | Agonist         | 919.313  | 2       | 4.15    | 2.655     | 276.375 | 521.731 | 279.666 | 98.754  | 143.311 | 0      | 49.054  |
| 2G44_A         | Agonist         | 888.98   | 1       | 1.5     | 4.004     | 258.36  | 496.853 | 285.061 | 54.7    | 157.091 | 0      | 29.171  |
| 2I0G_A         | Agonist         | 922.152  | 2       | 2.25    | 3.428     | 282.338 | 530.43  | 162.366 | 109.321 | 258.743 | 0      | 51.617  |
| 2I0J_A         | Agonist         | 922.41   | 2       | 2.25    | 3.43      | 282.338 | 530.423 | 162.363 | 109.32  | 258.74  | 0      | 51.616  |
| 2I0K_A         | Antagonist      | 1251.89  | 3       | 3.25    | 4.493     | 398.504 | 660.97  | 144.878 | 104.184 | 411.909 | 0      | 67.566  |
| 2JF9_A         | Antagonist      | 1356.674 | 1       | 3.5     | 5.85      | 387.521 | 752.944 | 314.016 | 59.861  | 379.067 | 0      | 35.831  |
| 2JFA_A         | Antagonist      | 1480.695 | 2       | 6.25    | 4.88      | 473.586 | 825.543 | 282.169 | 137.781 | 368.055 | 37.538 | 81.621  |
| 2OCF_A         | Agonist         | 910.352  | 2       | 2.45    | 4.004     | 272.386 | 511.15  | 303.648 | 95.839  | 111.663 | 0      | 43.692  |
| 2OUZ_A         | Antagonist      | 1389.545 | 1       | 3.5     | 6.047     | 413.558 | 767.271 | 346.336 | 58.98   | 361.955 | 0      | 35.739  |
| 2P15_A         | Agonist         | 1305.953 | 2       | 1.5     | 6.702     | 442.52  | 699.197 | 264.156 | 80.167  | 270.828 | 84.046 | 40.331  |
| 2POG_A         | Agonist         | 919.083  | 2       | 2.25    | 3.541     | 282.338 | 525.986 | 155.008 | 93.639  | 277.339 | 0      | 49.888  |
| 2Q70_A         | Agonist         | 948.191  | 2       | 2.25    | 3.884     | 318.319 | 544.712 | 97.697  | 109.327 | 261.808 | 75.88  | 51.859  |
| 2QA6_A         | Partial agonist | 751.392  | 4       | 3.25    | 0.901     | 242.234 | 455.836 | 0       | 207.676 | 248.159 | 0      | 95.967  |
| 2QA8_A         | Agonist         | 806.621  | 2       | 3.75    | 1.67      | 270.241 | 480.176 | 0       | 187.051 | 293.125 | 0      | 98.578  |
| 2QAB_A         | Partial agonist | 837.901  | 2       | 2.5     | 2.687     | 254.288 | 494.603 | 106.54  | 127.117 | 260.946 | 0      | 61.621  |
| 2QE4_A         | Agonist         | 1029.539 | 2       | 3.95    | 3.394     | 326.391 | 569.357 | 266.525 | 109.294 | 193.537 | 0      | 58.725  |
| 2QGT_A         | Agonist         | 1029.167 | 2       | 4.15    | 3.309     | 316.439 | 562.651 | 362.731 | 95.928  | 103.992 | 0      | 51.497  |
| 2QGW_A         | Partial agonist | 782.758  | 2       | 2.5     | 2.584     | 260.679 | 473.218 | 0       | 127.326 | 291.419 | 54.473 | 61.694  |
| 2QH6_A         | Partial agonist | 1287.23  | 2       | 7.2     | 3.427     | 424.449 | 698.586 | 322.021 | 154.097 | 222.468 | 0      | 112.216 |
| 2QR9_A         | Partial agonist | 1170.216 | 2       | 7.2     | 2.501     | 394.38  | 644.494 | 217.73  | 188.203 | 238.561 | 0      | 123.565 |
| 2QSE_A         | Partial agonist | 788.718  | 3       | 3.75    | 1.435     | 240.264 | 476.526 | 78.192  | 166.932 | 231.402 | 0      | 77.342  |
| 2QXM_A         | Agonist         | 766.589  | 2       | 3       | 2.185     | 224.265 | 464.81  | 78.192  | 112.207 | 274.411 | 0      | 54.789  |
| 2QXS_A         | Antagonist      | 1480.669 | 2       | 6.25    | 4.88      | 473.586 | 825.489 | 282.13  | 137.775 | 368.038 | 37.545 | 81.615  |
| 2R6W_A         | Agonist         | 1513.724 | 2       | 6.25    | 5.046     | 487.612 | 821.948 | 306.203 | 139.889 | 339.17  | 36.686 | 81.705  |
| 2R6Y_A         | Partial agonist | 1408.074 | 2       | 6.25    | 4.348     | 459.559 | 768.98  | 253.981 | 144.874 | 333.506 | 36.619 | 82.143  |
| 3DT3_A         | Antagonist      | 1090.671 | 3       | 2.75    | 3.872     | 358.393 | 599.685 | 67.901  | 157.5   | 374.283 | 0      | 73.767  |
| 3ERD_A         | Agonist         | 951.228  | 2       | 1.5     | 5.056     | 268.355 | 540.511 | 184.925 | 109.37  | 246.215 | 0      | 45.09   |



| PDB code_Chain | Ligand Profile  | volume   | donorHB | accptHB | QPlogPo/w | MW      | SASA    | FOSA    | FISA    | PISA    | WPSA    | PSA     |
|----------------|-----------------|----------|---------|---------|-----------|---------|---------|---------|---------|---------|---------|---------|
| 3ERT_A         | Antagonist      | 1354.507 | 1       | 3.5     | 5.835     | 387.521 | 749.952 | 313.064 | 59.867  | 377.02  | 0       | 35.832  |
| 1L2J_B         | Antagonist      | 1059.05  | 2       | 1.5     | 4.498     | 320.43  | 583.851 | 286.816 | 109.425 | 187.609 | 0       | 45.111  |
| 1NDE_A         | Antagonist      | 1553.319 | 3       | 6.25    | 5.491     | 485.046 | 884.433 | 324.445 | 117.961 | 332.842 | 109.186 | 80.906  |
| 1QKM_A         | Antagonist      | 806.688  | 2       | 3.75    | 1.67      | 270.241 | 480.232 | 0       | 187.061 | 293.171 | 0       | 98.585  |
| 1QKN_A         | Antagonist      | 1480.655 | 2       | 6.25    | 4.88      | 473.586 | 825.488 | 282.133 | 137.776 | 368.035 | 37.544  | 81.619  |
| 1U3Q_A         | Agonist         | 747.317  | 3       | 3.75    | 0.963     | 243.218 | 454.022 | 0       | 203.6   | 250.422 | 0       | 92.546  |
| 1U3R_A         | Agonist         | 854.726  | 3       | 3.25    | 1.975     | 279.295 | 500.287 | 17.454  | 117.607 | 365.225 | 0       | 65.213  |
| 1U3S_A         | Agonist         | 863.99   | 2       | 3       | 2.532     | 277.279 | 512.274 | 0       | 161.408 | 350.866 | 0       | 71.804  |
| 1U9E_A         | Agonist         | 757.576  | 2       | 2.25    | 2.434     | 228.247 | 457.424 | 58.244  | 109.304 | 289.876 | 0       | 53.269  |
| 1X76_A         | Agonist         | 810.96   | 2       | 3.5     | 1.861     | 251.241 | 492.397 | 0       | 178.375 | 314.022 | 0       | 78.462  |
| 1X78_A         | Agonist         | 868.565  | 2       | 3.5     | 2.228     | 265.268 | 516.565 | 47.525  | 173.45  | 295.589 | 0       | 78.041  |
| 1X7B_A         | Agonist         | 850.65   | 2       | 3.5     | 2.6       | 271.247 | 513.434 | 63.95   | 124.64  | 281.539 | 43.304  | 63.639  |
| 1X7J_A         | Agonist         | 806.687  | 2       | 3.75    | 1.67      | 270.241 | 480.231 | 0       | 187.062 | 293.17  | 0       | 98.585  |
| 1YY4_A         | Agonist         | 835.257  | 2       | 1.5     | 3.51      | 270.715 | 498.16  | 0       | 102.727 | 336.685 | 58.747  | 44.119  |
| 1YYE_A         | Agonist         | 873.808  | 2       | 3       | 2.621     | 279.27  | 521.528 | 0       | 172.988 | 305.159 | 43.381  | 70.62   |
| 1ZAF_A         | Agonist         | 825.798  | 2       | 3.5     | 2.298     | 317.138 | 493.206 | 0       | 155.892 | 277.347 | 59.967  | 77.33   |
| 2GIU_A         | Agonist         | 934.183  | 1       | 2.75    | 3.607     | 335.24  | 528.893 | 268.51  | 103.416 | 97.397  | 59.57   | 51.092  |
| 2JJ3_A         | Agonist         | 1067.001 | 2       | 3.95    | 3.63      | 326.391 | 601.8   | 285.877 | 109.249 | 206.674 | 0       | 58.306  |
| 2NV7_A         | Partial agonist | 874.582  | 2       | 3.95    | 2.447     | 263.295 | 517.696 | 16.347  | 135.448 | 365.9   | 0       | 59.645  |
| 2QTU_A         | Agonist         | 1091.47  | 2       | 3.95    | 4.071     | 362.372 | 610.757 | 221.178 | 109.247 | 204.447 | 75.885  | 58.335  |
| 2Z4B_A         | Agonist         | 947.828  | 2       | 2.25    | 3.846     | 318.319 | 543.331 | 108.011 | 109.322 | 258.713 | 67.285  | 51.792  |
| 2PJL_A         | Antagonist      | 1223.443 | 1       | 1.5     | 6.151     | 332.488 | 701.591 | 382.134 | 4.625   | 314.832 | 0       | 14.691  |
| 2E2R_A         | Agonist         | 806.872  | 2       | 1.5     | 3.317     | 228.29  | 471.911 | 114.139 | 109.419 | 248.352 | 0       | 45.102  |
| 2EWP_A         | Antagonist      | 1440.787 | 2       | 5.2     | 5.082     | 417.547 | 791.335 | 299.889 | 116.293 | 375.153 | 0       | 58.941  |
| 2GPP_A         | Agonist         | 1023.812 | 3       | 4.25    | 2.996     | 284.357 | 607.232 | 199.726 | 126.49  | 281.016 | 0       | 75.208  |
| 2GPU_A         | Antagonist      | 1354.41  | 1       | 3.5     | 5.833     | 387.521 | 748.849 | 313.058 | 59.866  | 375.925 | 0       | 35.831  |
| 2GPV_A         | Antagonist      | 1352.704 | 1       | 3.5     | 5.816     | 387.521 | 744.04  | 314.175 | 59.928  | 369.938 | 0       | 34.039  |
| 2P7G_A         | Agonist         | 806.745  | 2       | 1.5     | 3.318     | 228.29  | 471.911 | 114.139 | 109.419 | 248.352 | 0       | 45.102  |
| 2P7Z_A         | Antagonist      | 1339.736 | 1       | 3.5     | 5.735     | 387.521 | 730.664 | 306.153 | 59.118  | 365.392 | 0       | 36.072  |
| 2ZAS_A         | Agonist         | 783.886  | 1       | 0.75    | 3.934     | 212.291 | 459.374 | 114.134 | 54.71   | 290.53  | 0       | 22.551  |
| 2ZKC_A         | Agonist         | 907.216  | 2       | 1.5     | 3.582     | 268.355 | 519.465 | 175.182 | 109.47  | 234.813 | 0       | 45.112  |
| 1M2Z_A         | Agonist         | 1139.082 | 3       | 8.15    | 1.83      | 392.466 | 605.073 | 331.868 | 178.913 | 79.831  | 14.461  | 106.26  |
| 1NHZ_A         | Antagonist      | 1414.901 | 1       | 3.75    | 6.107     | 429.601 | 754.019 | 539.255 | 94.523  | 120.24  | 0       | 53.001  |
| 1P93_A         | Agonist         | 1139.081 | 3       | 8.15    | 1.83      | 392.466 | 605.072 | 331.868 | 178.912 | 79.831  | 14.461  | 106.26  |
| 3BQD_A         | Agonist         | 1494.958 | 3       | 7.15    | 4.577     | 490.641 | 778.881 | 472.663 | 142.521 | 163.697 | 0       | 93.249  |
| 3CLD_A         | Agonist         | 1436.093 | 1       | 8.2     | 4.757     | 538.578 | 748.026 | 291.535 | 114.939 | 229.947 | 111.605 | 100.472 |
| 3E7C_A         | Agonist         | 1432.138 | 3       | 6       | 5.683     | 562.35  | 766.919 | 139.781 | 117.427 | 327.718 | 181.993 | 106.37  |
| 3GN8_A         | Agonist         | 1139.081 | 3       | 8.15    | 1.83      | 392.466 | 605.072 | 331.868 | 178.912 | 79.831  | 14.461  | 106.26  |
| 3H52_A         | Antagonist      | 1415.624 | 1       | 3.75    | 6.113     | 429.601 | 755.826 | 539.552 | 94.46   | 121.814 | 0       | 52.987  |
| 3K23_B         | Agonist         | 1832.911 | 4       | 8.25    | 5.826     | 655.691 | 921.336 | 406.089 | 157.333 | 247.83  | 110.084 | 125.164 |

| PDB code_Chain | Ligand Profile  | volume   | donorHB | accptHB | QPlogPo/w | MW      | SASA    | FOSA    | FISA    | PISA    | WPSA    | PSA     |
|----------------|-----------------|----------|---------|---------|-----------|---------|---------|---------|---------|---------|---------|---------|
| 1Y9R_A         | Agonist         | 1075.643 | 1       | 5.7     | 2.728     | 330.466 | 579.428 | 408.42  | 141.562 | 29.447  | 0       | 76.221  |
| 1YA3_A         | Agonist         | 1053.224 | 0       | 4       | 3.87      | 314.467 | 567.111 | 447.07  | 90.595  | 29.447  | 0       | 54.492  |
| 2A3I_A         | Agonist         | 1084.292 | 2       | 7.4     | 1.939     | 346.466 | 579.497 | 388.638 | 162.24  | 28.619  | 0       | 92.066  |
| 2AA2_A         | Agonist         | 1083.417 | 2       | 9.4     | 1.074     | 360.449 | 577.381 | 345.252 | 203.524 | 28.605  | 0       | 120.044 |
| 2AA5_A         | Agonist         | 1053.224 | 0       | 4       | 3.87      | 314.467 | 567.111 | 447.07  | 90.595  | 29.446  | 0       | 54.492  |
| 2AA6_A         | Agonist         | 1053.224 | 0       | 4       | 3.87      | 314.467 | 567.111 | 447.07  | 90.595  | 29.446  | 0       | 54.492  |
| 2AA7_A         | Agonist         | 1075.642 | 1       | 5.7     | 2.728     | 330.466 | 579.428 | 408.419 | 141.562 | 29.447  | 0       | 76.221  |
| 2AAX_A         | Agonist         | 1057.652 | 3       | 7.2     | 1.573     | 358.433 | 561.094 | 272.421 | 192.581 | 96.093  | 0       | 106.329 |
| 2AB2_A         | Antagonist      | 1239.767 | 0       | 7       | 3.139     | 416.574 | 648.836 | 476.611 | 133.456 | 22.525  | 16.244  | 92.425  |
| 2ABI_A         | Agonist         | 1080.247 | 1       | 5.7     | 2.7       | 332.482 | 577.787 | 432.639 | 145.149 | 0       | 0       | 76.35   |
| 2OAX_A         | Antagonist      | 1259.44  | 0       | 7       | 3.086     | 416.574 | 663.946 | 471.246 | 157.385 | 23.424  | 11.891  | 97.222  |
| 1A28_A         | Agonist         | 1053.224 | 0       | 4       | 3.87      | 314.467 | 567.111 | 447.07  | 90.594  | 29.446  | 0       | 54.492  |
| 1E3K_A         | Agonist         | 948.286  | 1       | 2.75    | 3.385     | 284.397 | 527.449 | 363.478 | 90.683  | 73.288  | 0       | 49.206  |
| 1SQN_A         | Agonist         | 998.826  | 1.5     | 2.75    | 3.358     | 298.424 | 554.932 | 391.105 | 92.852  | 70.975  | 0       | 49.518  |
| 1SR7_A         | Agonist         | 1396.721 | 1       | 8.2     | 4.389     | 521.436 | 699.503 | 283.835 | 116.268 | 220.495 | 78.906  | 99.107  |
| 1ZUC_A         | Agonist         | 961.606  | 1       | 4.5     | 3.3       | 297.374 | 561.654 | 204.83  | 89.108  | 185.104 | 82.611  | 59.092  |
| 2W8Y_A         | Antagonist      | 1411.668 | 1       | 3.75    | 6.086     | 429.601 | 750.608 | 536.161 | 94.588  | 119.859 | 0       | 52.921  |
| 3KBA_A         | Partial agonist | 1214.05  | 0       | 7       | 3.262     | 403.926 | 661.79  | 233.098 | 150.804 | 212.166 | 65.722  | 71.288  |
| 1E3G_A         | Agonist         | 948.286  | 1       | 2.75    | 3.385     | 284.397 | 527.449 | 363.478 | 90.683  | 73.288  | 0       | 49.206  |
| 1GS4_A         | Agonist         | 1098.961 | 3       | 8.15    | 1.584     | 380.455 | 581.372 | 359.301 | 185.781 | 28.206  | 8.083   | 108.51  |
| 1T5Z_A         | Agonist         | 968.983  | 1       | 3.7     | 3.659     | 290.445 | 525.144 | 430.003 | 95.141  | 0       | 0       | 50.506  |
| 1T63_A         | Agonist         | 968.984  | 1       | 3.7     | 3.659     | 290.445 | 525.144 | 430.003 | 95.141  | 0       | 0       | 50.506  |
| 1T65_A         | Agonist         | 968.984  | 1       | 3.7     | 3.659     | 290.445 | 525.144 | 430.003 | 95.141  | 0       | 0       | 50.506  |
| 1XJ7_A         | Agonist         | 968.983  | 1       | 3.7     | 3.659     | 290.445 | 525.144 | 430.003 | 95.141  | 0       | 0       | 50.506  |
| 1XOW_A         | Agonist         | 948.286  | 1       | 2.75    | 3.385     | 284.397 | 527.449 | 363.478 | 90.683  | 73.288  | 0       | 49.206  |
| 1XQ3_A         | Agonist         | 948.286  | 1       | 2.75    | 3.385     | 284.397 | 527.449 | 363.478 | 90.683  | 73.288  | 0       | 49.206  |
| 1Z95_A         | Agonist         | 1166.582 | 1       | 7.75    | 3.015     | 430.373 | 658.333 | 80.983  | 175.787 | 247.498 | 154.065 | 109.954 |
| 2AM9_A         | Agonist         | 962.433  | 1       | 3.7     | 3.32      | 288.429 | 524.41  | 395.378 | 99.588  | 29.444  | 0       | 50.852  |
| 2AMA_A         | Agonist         | 968.984  | 1       | 3.7     | 3.659     | 290.445 | 525.144 | 430.003 | 95.141  | 0       | 0       | 50.506  |
| 2AMB_A         | Agonist         | 1038.519 | 1       | 2.75    | 4.157     | 312.451 | 564.911 | 416.211 | 82.137  | 66.562  | 0       | 47.958  |
| 2AO6_A         | Agonist         | 948.286  | 1       | 2.75    | 3.385     | 284.397 | 527.449 | 363.478 | 90.683  | 73.288  | 0       | 49.206  |
| 2AX6_A         | Agonist         | 839.503  | 2       | 4.25    | 2.252     | 292.214 | 500.839 | 149.533 | 147.462 | 101.071 | 102.772 | 95.361  |
| 2AX7_A         | Agonist         | 1123.96  | 2       | 5       | 3.928     | 402.302 | 648.465 | 91.447  | 146.046 | 266.895 | 144.078 | 101.505 |
| 2AX8_A         | Agonist         | 1123.946 | 2       | 5       | 3.928     | 402.302 | 648.448 | 91.442  | 146.043 | 266.885 | 144.078 | 101.503 |
| 2AX9_A         | Agonist         | 885.832  | 2       | 4.25    | 2.658     | 371.11  | 524.528 | 111.371 | 145.693 | 100.859 | 166.605 | 94.473  |
| 2AXA_A         | Agonist         | 1123.947 | 2       | 5       | 3.928     | 402.302 | 648.452 | 91.443  | 146.044 | 266.887 | 144.078 | 101.502 |
| 2HVC_A         | Agonist         | 935.657  | 1       | 3.5     | 4.353     | 392.224 | 539.95  | 49.956  | 85.118  | 107.68  | 297.195 | 44.797  |
| 2OZ7_A         | Agonist         | 1243.354 | 0       | 6       | 3.923     | 418.959 | 652.746 | 477.905 | 113.842 | 2.404   | 58.596  | 79.633  |
| 2PIO_A         | Agonist         | 968.984  | 1       | 3.7     | 3.659     | 290.445 | 525.144 | 430.003 | 95.141  | 0       | 0       | 50.506  |
| 2PIP_A         | Agonist         | 968.984  | 1       | 3.7     | 3.659     | 290.445 | 525.144 | 430.003 | 95.141  | 0       | 0       | 50.506  |

| PDB code_Chain | Ligand Profile | volume   | donorHB | accptHB | QPlogPo/w | MW      | SASA    | FOSA    | FISA    | PISA    | WPSA    | PSA     |
|----------------|----------------|----------|---------|---------|-----------|---------|---------|---------|---------|---------|---------|---------|
| 2PIQ_A         | Agonist        | 968.984  | 1       | 3.7     | 3.659     | 290.445 | 525.144 | 430.003 | 95.141  | 0       | 0       | 50.506  |
| 2PIR_A         | Agonist        | 968.984  | 1       | 3.7     | 3.659     | 290.445 | 525.144 | 430.003 | 95.141  | 0       | 0       | 50.506  |
| 2PIT_A         | Agonist        | 968.984  | 1       | 3.7     | 3.659     | 290.445 | 525.144 | 430.003 | 95.141  | 0       | 0       | 50.506  |
| 2PIU_A         | Agonist        | 968.983  | 1       | 3.7     | 3.659     | 290.445 | 525.143 | 430.003 | 95.141  | 0       | 0       | 50.506  |
| 2PIV_A         | Agonist        | 968.984  | 1       | 3.7     | 3.659     | 290.445 | 525.144 | 430.003 | 95.141  | 0       | 0       | 50.506  |
| 2PIW_A         | Agonist        | 968.984  | 1       | 3.7     | 3.659     | 290.445 | 525.144 | 430.003 | 95.141  | 0       | 0       | 50.506  |
| 2PIX_A         | Agonist        | 968.983  | 1       | 3.7     | 3.659     | 290.445 | 525.144 | 430.003 | 95.141  | 0       | 0       | 50.506  |
| 2PKL_A         | Agonist        | 968.984  | 1       | 3.7     | 3.659     | 290.445 | 525.144 | 430.003 | 95.141  | 0       | 0       | 50.506  |
| 2PNU_A         | Agonist        | 1382.16  | 1       | 5.4     | 5.578     | 446.576 | 737.257 | 422.818 | 92.264  | 128.216 | 93.959  | 57.057  |
| 2Q7I_A         | Agonist        | 962.433  | 1       | 3.7     | 3.32      | 288.429 | 524.41  | 395.378 | 99.588  | 29.444  | 0       | 50.852  |
| 2Q7J_A         | Agonist        | 962.433  | 1       | 3.7     | 3.32      | 288.429 | 524.41  | 395.378 | 99.588  | 29.444  | 0       | 50.852  |
| 2Q7K_A         | Agonist        | 962.433  | 1       | 3.7     | 3.32      | 288.429 | 524.41  | 395.378 | 99.588  | 29.444  | 0       | 50.852  |
| 2Q7L_A         | Agonist        | 962.433  | 1       | 3.7     | 3.32      | 288.429 | 524.41  | 395.378 | 99.588  | 29.444  | 0       | 50.852  |
| 2Z4J_A         | Agonist        | 968.983  | 1       | 3.7     | 3.659     | 290.445 | 525.144 | 430.003 | 95.141  | 0       | 0       | 50.506  |
| 3B5R_A         | Agonist        | 1163.979 | 2       | 5.5     | 4.336     | 416.759 | 680.236 | 91.492  | 129.16  | 242.595 | 216.989 | 85.101  |
| 3B65_A         | Agonist        | 1115.304 | 2       | 7       | 2.554     | 447.231 | 647.283 | 95.616  | 189.621 | 285.871 | 76.175  | 108.417 |
| 3B66_A         | Agonist        | 1177.746 | 2       | 6.5     | 2.957     | 409.321 | 686.714 | 91.246  | 226.223 | 262.164 | 107.082 | 130.024 |
| 3B67_A         | Agonist        | 1157.927 | 2       | 5       | 4.625     | 474.264 | 656.376 | 86.52   | 134.455 | 150.356 | 285.046 | 100.18  |
| 3B68_A         | Agonist        | 1276.328 | 3       | 7.5     | 3.101     | 441.363 | 734.936 | 185.746 | 204.232 | 247.918 | 97.041  | 140.188 |
